# Supplementary material for: Cryogenic ion trap vibrational spectroscopy of the microhydrated sulfate dianions SO42−(H2O)3−8
Source: Royal Society of Chemistry journal article supplement (doi:10.1039/d0cp04386a), 2020-01-01

## Structures of $\text{SO}_4^{2-}(\text{H}_2\text{O})_3$

| atom | x         | y         | z         |
|------|-----------|-----------|-----------|
| S    | 0.000000  | 0.000000  | 1.185295  |
| O    | 0.000000  | 0.000000  | 2.659275  |
| O    | 0.000000  | 1.408657  | 0.664339  |
| O    | 1.219932  | -0.704328 | 0.664339  |
| O    | -1.219932 | -0.704328 | 0.664339  |
| O    | -0.476067 | 1.658551  | -1.957555 |
| H    | -0.311684 | 1.631425  | -0.970205 |
| H    | -0.950069 | 0.823199  | -2.097035 |
| O    | 1.674381  | -0.416989 | -1.957555 |
| H    | 1.568697  | -0.545786 | -0.970205 |
| H    | 1.187946  | 0.411185  | -2.097035 |
| O    | -1.198314 | -1.241562 | -1.957555 |
| H    | -1.257013 | -1.085639 | -0.970205 |
| H    | -0.237876 | -1.234384 | -2.097035 |

3.3.3-1

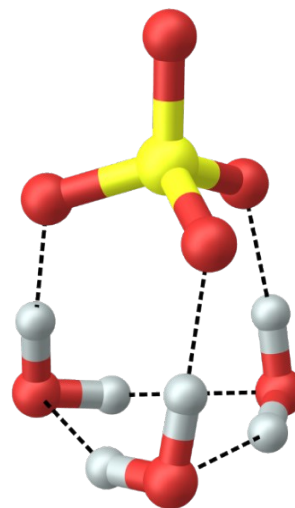

| atom | x         | y         | z         |
|------|-----------|-----------|-----------|
| S    | -1.032982 | -0.274516 | 0.059785  |
| O    | -2.441358 | -0.299782 | 0.495242  |
| O    | -0.171976 | 0.308822  | 1.158402  |
| O    | -0.875399 | 0.595181  | -1.156513 |
| O    | -0.553953 | -1.650458 | -0.255011 |
| O    | 2.159785  | -2.104864 | -0.497411 |
| H    | 1.176629  | -2.003704 | -0.456511 |
| H    | 2.445945  | -1.244379 | -0.152762 |
| O    | 0.560603  | 2.728757  | -0.538025 |
| H    | 0.473984  | 2.512597  | 0.398759  |
| H    | 0.018215  | 1.965802  | -0.902381 |
| O    | 2.410061  | 0.610745  | 0.695418  |
| H    | 2.251732  | 1.263916  | 0.001505  |
| H    | 1.459094  | 0.390824  | 0.938023  |

3.4.2-1

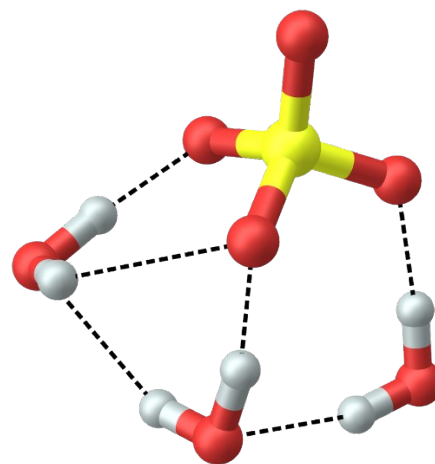

| atom | x         | y         | z         |
|------|-----------|-----------|-----------|
| S    | 0.600821  | 0.055643  | 0.000000  |
| O    | -0.645223 | 0.902276  | 0.000000  |
| O    | 1.793463  | 0.947117  | 0.000000  |
| O    | 0.600821  | -0.811249 | 1.216674  |
| O    | 0.600821  | -0.811249 | -1.216674 |
| O    | 0.584499  | 3.447343  | 0.000000  |
| H    | 1.279294  | 2.754652  | 0.000000  |
| H    | -0.163658 | 2.820224  | 0.000000  |
| O    | -2.884445 | -0.777550 | 0.000000  |
| H    | -2.364845 | -1.596986 | 0.000000  |
| H    | -2.163014 | -0.104289 | 0.000000  |
| O    | -0.738158 | -2.901068 | 0.000000  |
| H    | -0.347577 | -2.364424 | -0.724950 |
| H    | -0.347577 | -2.364424 | 0.724950  |

3.5.1-1

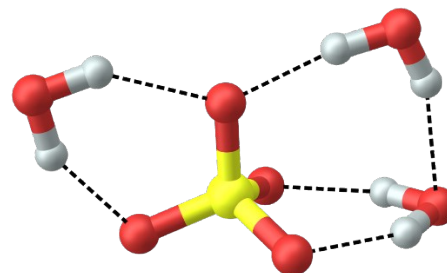

| atom | x         | y         | z         |
|------|-----------|-----------|-----------|
| S    | -0.331509 | -0.467031 | 0.255778  |
| O    | 0.360219  | -0.099684 | 1.529043  |
| O    | -0.451451 | 0.773084  | -0.596927 |
| O    | -1.691252 | -1.000578 | 0.542443  |
| O    | 0.475023  | -1.484946 | -0.475428 |
| O    | 3.038937  | -0.516334 | -0.966431 |
| H    | 2.158738  | -0.946312 | -0.836294 |
| H    | 2.877163  | 0.346338  | -0.553084 |
| O    | 1.890179  | 1.900858  | 0.430239  |
| H    | 1.561789  | 1.235997  | 1.078539  |
| H    | 1.136714  | 1.803282  | -0.188291 |
| O    | -3.256226 | 0.896594  | -0.767646 |
| H    | -3.022483 | 0.107580  | -0.235409 |
| H    | -2.331206 | 1.173658  | -0.920246 |

3.5.1-2

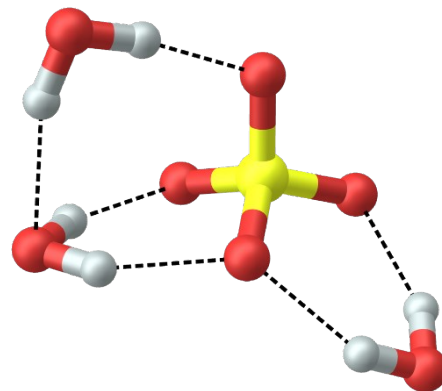

| atom | x         | y         | z         |
|------|-----------|-----------|-----------|
| S    | -0.682738 | -0.614595 | -0.160171 |
| O    | -0.417719 | 0.477739  | -1.162197 |
| O    | 0.350448  | -1.685690 | -0.321969 |
| O    | -2.037180 | -1.161823 | -0.344827 |
| O    | -0.534905 | -0.020784 | 1.221186  |
| O    | 2.309734  | 1.114146  | -1.185900 |
| H    | 1.345809  | 0.924113  | -1.274529 |
| H    | 2.513376  | 0.622575  | -0.375107 |
| O    | -1.194243 | 2.612049  | 0.648690  |
| H    | -1.033685 | 1.768865  | 1.127180  |
| H    | -0.984592 | 2.265324  | -0.235386 |
| O    | 2.255059  | -0.634494 | 1.281155  |
| H    | 1.765610  | -1.203891 | 0.635320  |
| H    | 1.467731  | -0.152620 | 1.596152  |

3.5.1-3

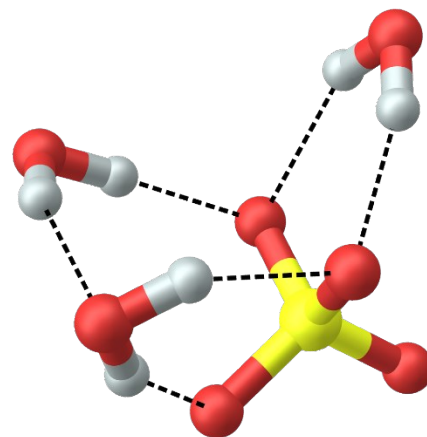

| atom | x         | y         | z         |
|------|-----------|-----------|-----------|
| S    | 0.407717  | -0.078393 | 0.032718  |
| O    | 1.326799  | -0.910445 | -0.794752 |
| O    | -0.578554 | 0.609627  | -0.865277 |
| O    | 1.188762  | 0.928592  | 0.801560  |
| O    | -0.353178 | -0.956581 | 0.983224  |
| O    | -2.765341 | -1.410463 | -0.015040 |
| H    | -1.883904 | -1.318166 | 0.458243  |
| H    | -2.529654 | -0.956999 | -0.833486 |
| O    | 3.759748  | 0.252597  | -0.078136 |
| H    | 3.132219  | -0.352471 | -0.525656 |
| H    | 3.068121  | 0.736733  | 0.417252  |
| O    | -2.960681 | 1.611265  | -0.034116 |
| H    | -3.225772 | 0.736465  | 0.279886  |
| H    | -2.024925 | 1.411980  | -0.299429 |

3.5.1-4 (originally 3.4.1-1)

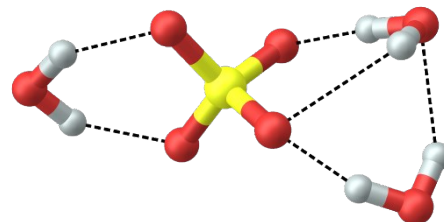

| atom | x         | y         | z         |
|------|-----------|-----------|-----------|
| S    | 0.000000  | 0.000000  | 0.370917  |
| O    | 1.221306  | -0.008140 | 1.221770  |
| O    | -1.221306 | 0.008140  | 1.221770  |
| O    | 0.000000  | -1.222161 | -0.505274 |
| O    | 0.000000  | 1.222161  | -0.505274 |
| O    | -2.268807 | 2.505734  | 0.595790  |
| H    | -2.163118 | 1.632134  | 1.028660  |
| H    | -1.493431 | 2.407434  | 0.011082  |
| O    | 2.268807  | -2.505734 | 0.595790  |
| H    | 2.163118  | -1.632134 | 1.028660  |
| H    | 1.493431  | -2.407434 | 0.011082  |
| O    | 0.000000  | 0.000000  | -3.032939 |
| H    | -0.002958 | 0.721978  | -2.373611 |
| H    | 0.002958  | -0.721978 | -2.373611 |

3.6.0-1

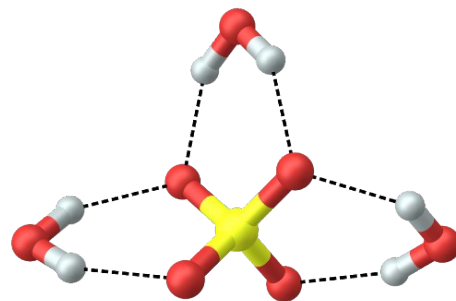

| atom | x         | y         | z         |
|------|-----------|-----------|-----------|
| S    | -0.562098 | -0.300629 | 0.000000  |
| O    | -0.764944 | 1.190528  | 0.000000  |
| O    | -1.859614 | -0.995141 | 0.000000  |
| O    | 0.233441  | -0.674696 | 1.221459  |
| O    | 0.233441  | -0.674696 | -1.221459 |
| O    | 0.233441  | 1.797367  | -2.553049 |
| H    | -0.187345 | 1.948370  | -1.683382 |
| H    | 0.402647  | 0.845592  | -2.405866 |
| O    | 0.233441  | 1.797367  | 2.553049  |
| H    | -0.187345 | 1.948370  | 1.683382  |
| H    | 0.402647  | 0.845592  | 2.405866  |
| O    | 2.317088  | -2.105801 | 0.000000  |
| H    | 1.776296  | -1.728644 | -0.722149 |
| H    | 1.776296  | -1.728644 | 0.722149  |

3.6.0-2

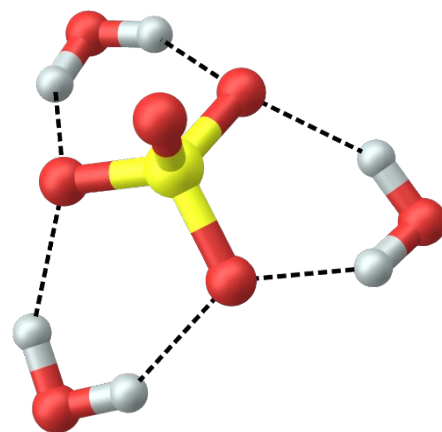

| atom | x         | y         | z         |
|------|-----------|-----------|-----------|
| S    | -0.204256 | -0.678135 | 0.000000  |
| O    | 1.006393  | -1.545403 | 0.000000  |
| O    | -1.017838 | -0.934833 | 1.220698  |
| O    | -1.017838 | -0.934833 | -1.220698 |
| O    | 0.234002  | 0.774970  | 0.000000  |
| O    | -1.017838 | 1.537666  | 2.456115  |
| H    | -1.190178 | 0.589327  | 2.267742  |
| H    | -0.487160 | 1.693771  | 1.654632  |
| O    | -1.017838 | 1.537666  | -2.456115 |
| H    | -0.487160 | 1.693771  | -1.654632 |
| H    | -1.190178 | 0.589327  | -2.267742 |
| O    | 3.055367  | 0.310110  | 0.000000  |
| H    | 2.255608  | 0.865882  | 0.000000  |
| H    | 2.571892  | -0.544679 | 0.000000  |

3.6.0-3

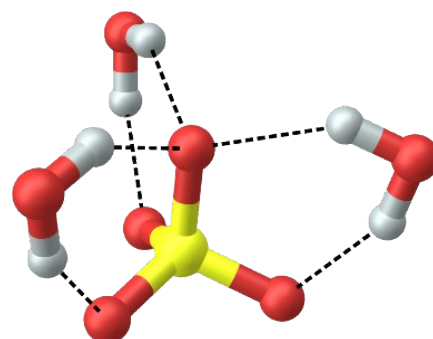

Supplement: d0cp04386a2.pdf [file d0cp04386a2.pdf]
