# Supplementary material for: Cryogenic ion trap vibrational spectroscopy of the microhydrated sulfate dianions SO42−(H2O)3−8
Source: Royal Society of Chemistry journal article supplement (doi:10.1039/d0cp04386a), 2020-01-01

## Structures of $\text{SO}_4^{2-}(\text{H}_2\text{O})_4$

| atom | x         | y         | z         |
|------|-----------|-----------|-----------|
| 16   | -1.361074 | -0.061224 | -0.039997 |
| 8    | -1.067887 | 1.378398  | -0.322610 |
| 8    | -2.768200 | -0.373566 | -0.330169 |
| 8    | -1.037535 | -0.360394 | 1.390619  |
| 8    | -0.454085 | -0.902564 | -0.913646 |
| 8    | 1.444359  | 2.116974  | 0.315964  |
| 1    | 1.623552  | 1.433292  | 0.987356  |
| 1    | 0.490709  | 1.930763  | 0.093867  |
| 8    | 1.944325  | -1.956753 | -0.229663 |
| 1    | 2.286415  | -1.262633 | -0.817120 |
| 1    | 0.976617  | -1.763332 | -0.322206 |
| 8    | 1.792740  | 0.378152  | -1.946880 |
| 1    | 1.838109  | 1.073617  | -1.262956 |
| 1    | 0.905334  | -0.007510 | -1.755366 |
| 8    | 1.548702  | -0.201135 | 2.084975  |
| 1    | 0.567159  | -0.221540 | 1.905158  |
| 1    | 1.869934  | -0.835962 | 1.422485  |

4.4.4-1 (4-V)

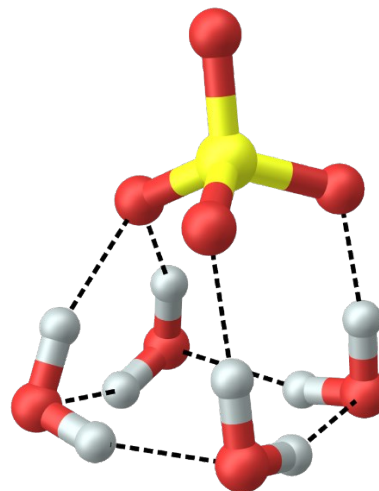

| atom | x         | y         | z         |
|------|-----------|-----------|-----------|
| 16   | -0.666304 | -0.581295 | 0.001275  |
| 8    | -0.718103 | 0.925251  | -0.001466 |
| 8    | 0.063388  | -1.040961 | -1.216716 |
| 8    | -2.049165 | -1.117701 | 0.002861  |
| 8    | 0.064596  | -1.037284 | 1.219896  |
| 8    | 2.722139  | -0.576974 | -1.214168 |
| 1    | 1.753183  | -0.798970 | -1.273138 |
| 1    | 2.855821  | -0.534688 | -0.253448 |
| 8    | 2.450600  | 0.147500  | 1.655258  |
| 1    | 2.277571  | 0.979874  | 1.186522  |
| 1    | 1.574740  | -0.317933 | 1.566914  |
| 8    | -3.554525 | 1.224533  | -0.000623 |
| 1    | -2.636963 | 1.550840  | -0.003389 |
| 1    | -3.319621 | 0.273000  | 0.001663  |
| 8    | 1.681802  | 2.103864  | -0.446424 |
| 1    | 2.102693  | 1.380205  | -0.938107 |
| 1    | 0.767582  | 1.742569  | -0.296363 |

4.5.3-1 (4-II)

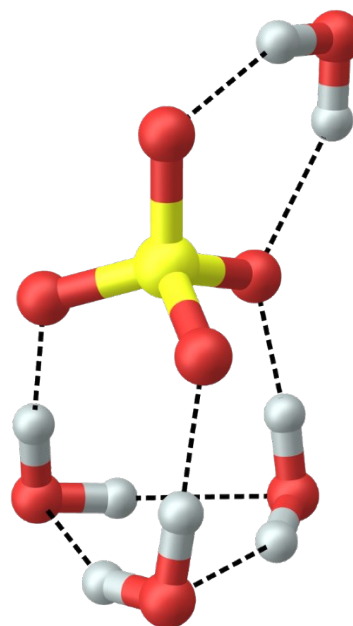

| atom | x         | y         | z         |
|------|-----------|-----------|-----------|
| 16   | 0.848834  | -0.839682 | 0.010714  |
| 8    | 2.029944  | -0.102467 | -0.539694 |
| 8    | 0.382916  | -0.122165 | 1.252010  |
| 8    | 1.191464  | -2.234780 | 0.310512  |
| 8    | -0.264418 | -0.775785 | -1.005344 |
| 8    | -2.914791 | -1.304178 | -0.283646 |
| 1    | -1.980007 | -1.312921 | -0.586781 |
| 1    | -2.886098 | -0.541004 | 0.315897  |
| 8    | 1.528762  | 2.374487  | 0.342387  |
| 1    | 1.883688  | 1.562056  | -0.108690 |
| 1    | 1.008393  | 1.905801  | 1.015378  |
| 8    | -0.867101 | 1.901063  | -1.334811 |
| 1    | -0.078287 | 2.242750  | -0.879726 |
| 1    | -0.687682 | 0.927367  | -1.338565 |
| 8    | -2.054716 | 1.084188  | 1.222654  |
| 1    | -1.883589 | 1.518927  | 0.369437  |
| 1    | -1.214226 | 0.569025  | 1.329077  |

4.5.3-2

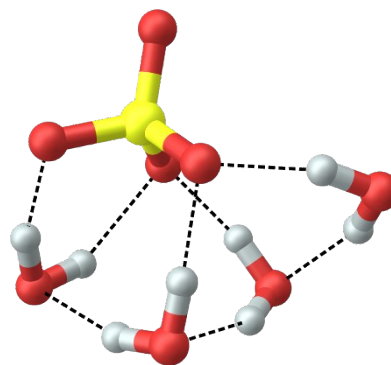

| atom | x         | y         | z         |
|------|-----------|-----------|-----------|
| 16   | -0.715630 | -0.498872 | 0.039872  |
| 8    | 0.244862  | -0.304993 | 1.187621  |
| 8    | -2.016221 | -0.993877 | 0.554746  |
| 8    | -0.128732 | -1.472449 | -0.920017 |
| 8    | -0.914955 | 0.825767  | -0.639962 |
| 8    | 2.418224  | -1.619642 | 0.068376  |
| 1    | 1.890267  | -1.178189 | 0.765188  |
| 1    | 1.666008  | -1.723021 | -0.556633 |
| 8    | 1.240041  | 2.163003  | 0.464500  |
| 1    | 0.514615  | 1.991814  | -0.171524 |
| 1    | 1.071892  | 1.363136  | 1.008064  |
| 8    | -3.724174 | 1.043218  | -0.301089 |
| 1    | -3.424677 | 0.209120  | 0.114938  |
| 1    | -2.838442 | 1.324870  | -0.596085 |
| 8    | 3.673896  | 0.924968  | -0.484627 |
| 1    | 2.888784  | 1.454114  | -0.244381 |
| 1    | 3.338112  | 0.012147  | -0.393904 |

4.6.2-1 (4-IV)

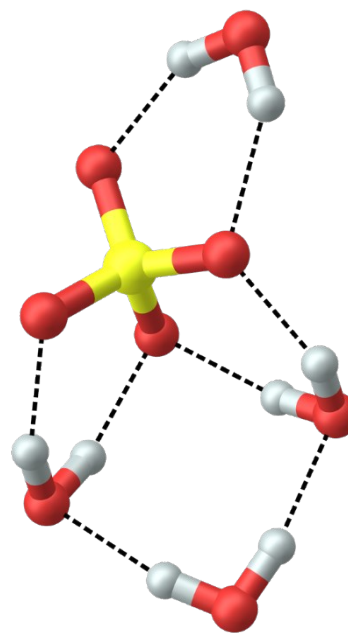

| atom | x         | y         | z         |
|------|-----------|-----------|-----------|
| 16   | 0.000000  | 0.000000  | 0.734035  |
| 8    | 0.000000  | 1.219632  | -0.143448 |
| 8    | 0.000000  | -1.219632 | -0.143448 |
| 8    | -1.224204 | 0.012163  | 1.578164  |
| 8    | 1.224204  | -0.012163 | 1.578164  |
| 8    | 2.818968  | -1.328189 | -0.244452 |
| 1    | 1.914903  | -1.559419 | -0.533707 |
| 1    | 2.545562  | -0.820336 | 0.551897  |
| 8    | -2.818968 | 1.328189  | -0.244452 |
| 1    | -1.914903 | 1.559419  | -0.533707 |
| 1    | -2.545562 | 0.820336  | 0.551897  |
| 8    | -2.399708 | -1.316578 | -1.620698 |
| 1    | -1.537763 | -1.380423 | -1.150820 |
| 1    | -2.721968 | -0.461147 | -1.296181 |
| 8    | 2.399708  | 1.316578  | -1.620698 |
| 1    | 2.721968  | 0.461147  | -1.296181 |
| 1    | 1.537763  | 1.380423  | -1.150820 |

4.6.2-2 (4-III)

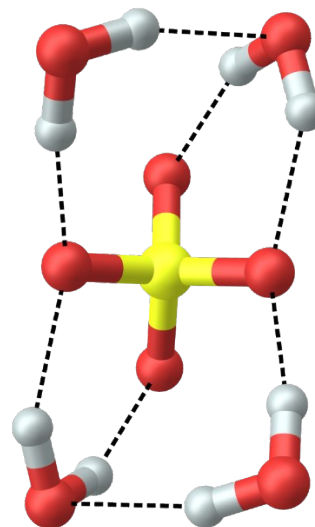

| atom | x         | y         | z         |
|------|-----------|-----------|-----------|
| 16   | -0.060522 | -0.710992 | -0.205826 |
| 8    | -0.004806 | -0.153598 | 1.194384  |
| 8    | -0.010175 | 0.445159  | -1.163899 |
| 8    | -1.322288 | -1.464919 | -0.397061 |
| 8    | 1.115593  | -1.595722 | -0.422020 |
| 8    | -1.498847 | 2.101839  | 0.610128  |
| 1    | -1.044016 | 1.400576  | 1.127015  |
| 1    | -1.108792 | 1.867497  | -0.253121 |
| 8    | -3.608693 | 0.078336  | 0.082178  |
| 1    | -3.102533 | 0.877510  | 0.301274  |
| 1    | -2.874841 | -0.549246 | -0.110038 |
| 8    | 2.820499  | -0.284202 | 1.280699  |
| 1    | 2.487940  | -0.909042 | 0.596860  |
| 1    | 1.939872  | 0.006036  | 1.587721  |
| 8    | 2.535093  | 1.656029  | -1.004675 |
| 1    | 2.823279  | 1.133982  | -0.239700 |
| 1    | 1.636446  | 1.285174  | -1.154681 |

4.6.2-3 (originally 4.8.0-3)

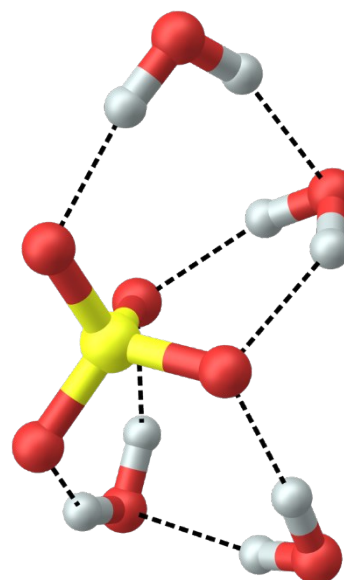

| atom | x         | y         | z         |
|------|-----------|-----------|-----------|
| 16   | -0.342850 | -0.188288 | 0.000000  |
| 8    | -1.603944 | 0.589901  | 0.000000  |
| 8    | -0.638457 | -1.653808 | 0.000000  |
| 8    | 0.464597  | 0.155819  | 1.218157  |
| 8    | 0.464597  | 0.155819  | -1.218157 |
| 8    | 0.464597  | -2.343782 | -2.516717 |
| 1    | 0.646593  | -1.394150 | -2.379164 |
| 1    | 0.000803  | -2.479825 | -1.669484 |
| 8    | 0.464597  | -2.343782 | 2.516717  |
| 1    | 0.646593  | -1.394150 | 2.379164  |
| 1    | 0.000803  | -2.479825 | 1.669484  |
| 8    | -1.050454 | 3.347073  | 0.000000  |
| 1    | -0.087639 | 3.228673  | 0.000000  |
| 1    | -1.351530 | 2.409979  | 0.000000  |
| 8    | 1.770452  | 2.302856  | 0.000000  |
| 1    | 1.471052  | 1.720567  | -0.728328 |
| 1    | 1.471052  | 1.720567  | 0.728328  |

4.7.1-1

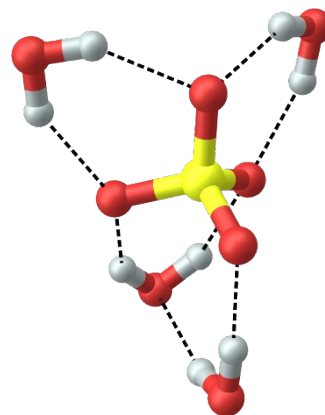

| atom | x         | y         | z         |
|------|-----------|-----------|-----------|
| 16   | 0.193948  | -0.022611 | 0.289684  |
| 8    | -0.168582 | -1.113118 | -0.675391 |
| 8    | 1.655280  | -0.098571 | 0.597847  |
| 8    | -0.605561 | -0.186594 | 1.532042  |
| 8    | -0.109130 | 1.304385  | -0.333357 |
| 8    | 2.278681  | -2.501325 | -0.769727 |
| 1    | 1.339502  | -2.303478 | -0.951776 |
| 1    | 2.437740  | -1.719564 | -0.208748 |
| 8    | -2.880525 | 1.459583  | -0.874466 |
| 1    | -3.068946 | 0.569982  | -0.535846 |
| 1    | -1.910058 | 1.512805  | -0.727758 |
| 8    | 2.434447  | 2.521443  | -0.107838 |
| 1    | 2.519277  | 1.607302  | 0.224177  |
| 1    | 1.485883  | 2.460828  | -0.327421 |
| 8    | -2.802916 | -1.310160 | 0.285703  |
| 1    | -2.065404 | -1.473580 | -0.334895 |
| 1    | -2.254709 | -0.897654 | 0.988818  |

4.7.1-2

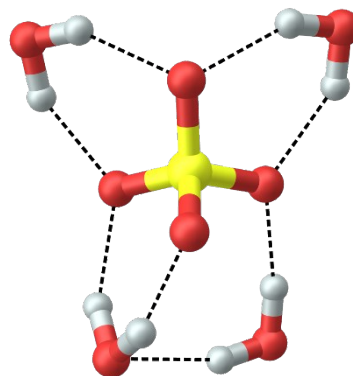

| atom | x         | y         | z         |
|------|-----------|-----------|-----------|
| 16   | -0.411143 | -0.379862 | -0.030628 |
| 8    | -1.531197 | -1.347420 | -0.084278 |
| 8    | 0.355993  | -0.537716 | 1.250592  |
| 8    | -0.947918 | 1.021925  | -0.093054 |
| 8    | 0.523495  | -0.601947 | -1.176721 |
| 8    | 2.337935  | -2.301980 | 0.367191  |
| 1    | 1.731019  | -1.797363 | 0.947747  |
| 1    | 2.011094  | -1.942478 | -0.473482 |
| 8    | -3.717586 | 0.394975  | -0.212302 |
| 1    | -3.211470 | -0.441669 | -0.174996 |
| 1    | -2.939339 | 0.981098  | -0.185622 |
| 8    | 2.347641  | 1.554265  | -1.357111 |
| 1    | 1.733875  | 0.788373  | -1.404058 |
| 1    | 2.108730  | 1.926712  | -0.494126 |
| 8    | 1.092396  | 2.216018  | 1.299239  |
| 1    | 1.180231  | 1.281969  | 1.565836  |
| 1    | 0.278079  | 2.096191  | 0.760307  |

4.7.1-3 (new)

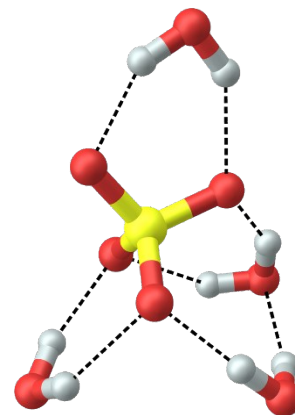

| atom | x         | y         | z         |
|------|-----------|-----------|-----------|
| 16   | 0.000000  | 0.000000  | 0.000000  |
| 8    | 0.865050  | -0.865045 | 0.859579  |
| 8    | -0.865045 | -0.865050 | -0.859579 |
| 8    | 0.865045  | 0.865050  | -0.859579 |
| 8    | -0.865050 | 0.865045  | 0.859579  |
| 8    | -3.417591 | 0.000000  | -0.000013 |
| 1    | -2.764107 | 0.514286  | 0.509998  |
| 1    | -2.764100 | -0.514286 | -0.510016 |
| 8    | 0.000000  | -3.417591 | 0.000013  |
| 1    | 0.514286  | -2.764100 | 0.510016  |
| 1    | -0.514286 | -2.764107 | -0.509998 |
| 8    | 3.417591  | 0.000000  | -0.000013 |
| 1    | 2.764107  | -0.514286 | 0.509998  |
| 1    | 2.764100  | 0.514286  | -0.510016 |
| 8    | 0.000000  | 3.417591  | 0.000013  |
| 1    | 0.514286  | 2.764107  | -0.509998 |
| 1    | -0.514286 | 2.764100  | 0.510016  |

4.8.0-1 (4-I)

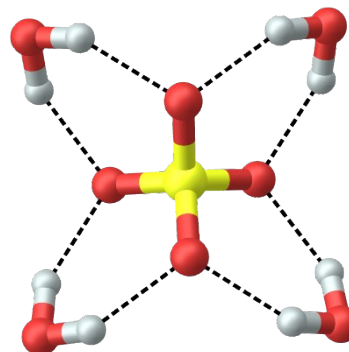

| atom | x         | y         | z         |
|------|-----------|-----------|-----------|
| 16   | -0.156960 | -0.436727 | 0.000000  |
| 8    | -1.391085 | -1.255911 | 0.000000  |
| 8    | 0.658791  | -0.731681 | 1.218790  |
| 8    | -0.525281 | 1.025696  | 0.000000  |
| 8    | 0.658791  | -0.731681 | -1.218790 |
| 8    | 2.852065  | -2.038789 | 0.000000  |
| 1    | 2.293328  | -1.700115 | 0.724607  |
| 1    | 2.293328  | -1.700115 | -0.724607 |
| 8    | -3.391501 | 0.674765  | 0.000000  |
| 1    | -2.937384 | -0.193646 | 0.000000  |
| 1    | -2.582536 | 1.213085  | 0.000000  |
| 8    | 0.658791  | 1.771804  | -2.492080 |
| 1    | 0.845339  | 0.825540  | -2.335880 |
| 1    | 0.159521  | 1.914645  | -1.668731 |
| 8    | 0.658791  | 1.771804  | 2.492080  |
| 1    | 0.845339  | 0.825540  | 2.335880  |
| 1    | 0.159521  | 1.914645  | 1.668731  |

4.8.0-2

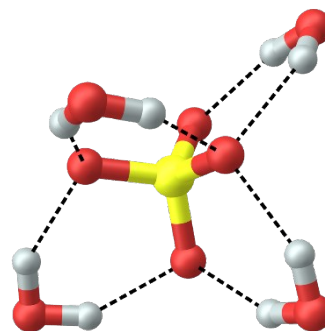

Supplement: d0cp04386a3.pdf [file d0cp04386a3.pdf]
