# Supplementary material for: Cryogenic ion trap vibrational spectroscopy of the microhydrated sulfate dianions SO42−(H2O)3−8
Source: Royal Society of Chemistry journal article supplement (doi:10.1039/d0cp04386a), 2020-01-01

## Structures of $\text{SO}_4^{2-}(\text{H}_2\text{O})_5$

| atom | x         | y         | z         |
|------|-----------|-----------|-----------|
| 16   | -0.850483 | -0.581903 | -0.076631 |
| 8    | 0.099082  | -0.579143 | -1.242641 |
| 8    | -2.150650 | -1.156377 | -0.486897 |
| 8    | -1.047296 | 0.836857  | 0.377199  |
| 8    | -0.250616 | -1.377956 | 1.027611  |
| 8    | 2.766072  | -1.235527 | -0.665856 |
| 8    | 1.995354  | 1.314596  | -1.789663 |
| 8    | 2.081929  | -0.353307 | 1.972890  |
| 8    | 1.242253  | 2.205882  | 0.884368  |
| 8    | -3.889021 | 0.971759  | 0.020660  |
| 1    | 2.726243  | -0.995559 | 0.280227  |
| 1    | 1.811391  | -1.221752 | -0.900960 |
| 1    | 1.141180  | 0.829912  | -1.696014 |
| 1    | 2.598321  | 0.613116  | -1.490405 |
| 1    | 1.926566  | 0.577793  | 1.728108  |
| 1    | 1.219223  | -0.772295 | 1.719475  |
| 1    | 1.624274  | 2.082423  | -0.001738 |
| 1    | 0.364644  | 1.755630  | 0.779815  |
| 1    | -3.557826 | 0.089631  | -0.244703 |
| 1    | -3.023153 | 1.337259  | 0.270943  |

5.6.4-1 (5-IV)

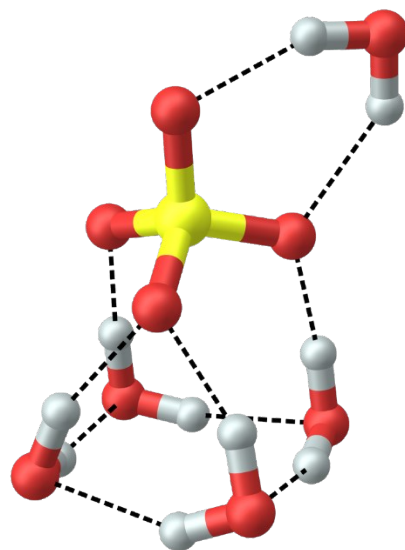

| atom | x         | y         | z         |
|------|-----------|-----------|-----------|
| 8    | -0.244124 | -1.286248 | 1.135761  |
| 16   | -0.846214 | -0.590030 | -0.034119 |
| 8    | 0.106526  | -0.674215 | -1.194353 |
| 8    | -1.055352 | 0.859246  | 0.298671  |
| 8    | -2.139403 | -1.209776 | -0.397744 |
| 1    | 0.354269  | 1.706378  | 0.890130  |
| 8    | 1.239257  | 2.076229  | 1.137884  |
| 1    | 1.701866  | 1.282509  | 1.465699  |
| 1    | 1.832560  | -1.189615 | -1.035100 |
| 8    | 2.810379  | -1.056320 | -1.038127 |
| 1    | 2.831475  | -0.118722 | -1.294607 |
| 1    | -3.561833 | 0.035574  | -0.245236 |
| 8    | -3.901179 | 0.932240  | -0.048090 |
| 1    | -3.037870 | 1.325924  | 0.165790  |
| 1    | 1.035614  | 0.885286  | -1.623014 |
| 8    | 1.747441  | 1.562963  | -1.635154 |
| 1    | 1.685004  | 1.912046  | -0.725046 |
| 1    | 1.332196  | -0.835779 | 1.645644  |
| 8    | 2.274545  | -0.555997 | 1.789143  |
| 1    | 2.661411  | -0.748091 | 0.917719  |

5.6.4-2

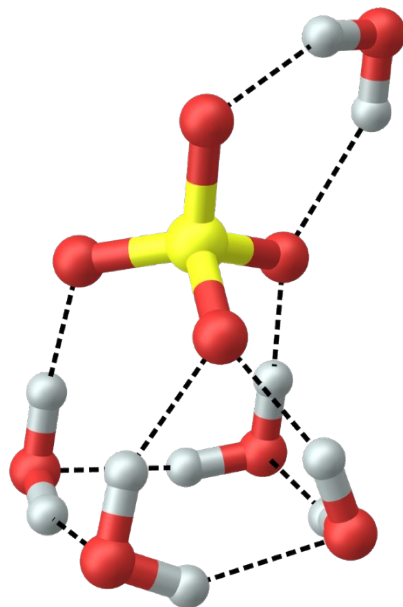

| atom | x         | y         | z         |
|------|-----------|-----------|-----------|
| 8    | 1.214177  | -1.854231 | 0.067608  |
| 16   | -0.014355 | -1.054486 | -0.101747 |
| 8    | -0.349227 | -0.336442 | 1.177158  |
| 8    | -1.165089 | -1.914742 | -0.484768 |
| 8    | 0.197897  | -0.018098 | -1.176649 |
| 1    | -0.203559 | 1.400496  | 1.290679  |
| 8    | -0.273091 | 2.382521  | 1.191348  |
| 1    | -0.877260 | 2.436695  | 0.431668  |
| 1    | 1.459586  | 1.191697  | -0.911334 |
| 8    | 2.019713  | 1.934748  | -0.581075 |
| 1    | 1.435934  | 2.291023  | 0.109669  |
| 1    | 2.819496  | -0.950821 | 0.315981  |
| 8    | 3.606588  | -0.369141 | 0.382566  |
| 1    | 3.232515  | 0.493317  | 0.137951  |
| 1    | -2.546935 | 1.106086  | -0.593997 |
| 8    | -1.974821 | 1.687495  | -1.123418 |
| 1    | -1.187887 | 1.107374  | -1.267116 |
| 1    | -2.362933 | -0.146275 | 1.194201  |
| 8    | -3.134557 | -0.386642 | 0.649689  |
| 1    | -2.672010 | -1.061558 | 0.100592  |

5.6.4-3

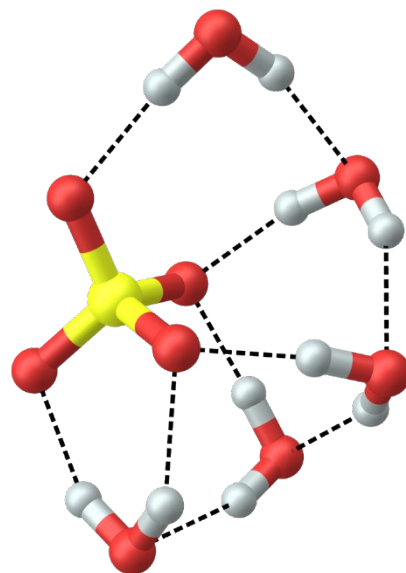

| atom | x         | y         | z         |
|------|-----------|-----------|-----------|
| 8    | 1.593520  | -1.416124 | -0.692820 |
| 16   | 0.320885  | -0.730511 | -0.363011 |
| 8    | -0.840057 | -1.586628 | -0.713148 |
| 8    | 0.236035  | 0.564763  | -1.118965 |
| 8    | 0.295699  | -0.420512 | 1.108228  |
| 1    | -1.123883 | 1.598289  | -0.701730 |
| 8    | -1.929424 | 2.076744  | -0.381394 |
| 1    | -1.969939 | 1.800625  | 0.548352  |
| 1    | -2.696274 | -0.064324 | 1.376875  |
| 8    | -2.140390 | 0.372033  | 2.042590  |
| 1    | -1.231816 | 0.074543  | 1.781564  |
| 1    | 2.984084  | 1.382812  | 0.045662  |
| 8    | 2.655270  | 2.019173  | -0.608524 |
| 1    | 1.804668  | 1.606486  | -0.866147 |
| 1    | -2.453766 | -0.964972 | -0.644912 |
| 8    | -3.320577 | -0.494881 | -0.545322 |
| 1    | -3.056656 | 0.428068  | -0.698707 |
| 1    | 2.241119  | -0.125959 | 1.619818  |
| 8    | 3.137864  | -0.271445 | 1.267851  |
| 1    | 2.864779  | -0.792379 | 0.479434  |

5.6.4-4

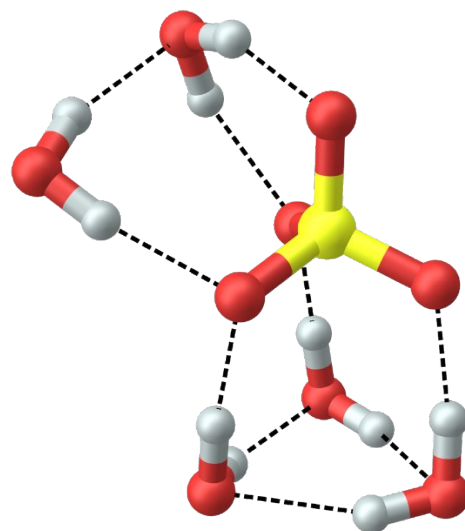

| atom | x         | y         | z         |
|------|-----------|-----------|-----------|
| 8    | -0.239550 | 0.536407  | -1.122313 |
| 16   | -0.319449 | -0.750660 | -0.352443 |
| 8    | -0.289745 | -0.425717 | 1.115773  |
| 8    | 0.843410  | -1.605423 | -0.699967 |
| 8    | -1.591555 | -1.442527 | -0.669853 |
| 1    | 1.324595  | 1.337973  | -1.111734 |
| 8    | 2.238831  | 1.701805  | -1.004035 |
| 1    | 2.759641  | 0.900275  | -0.834859 |
| 1    | -2.231153 | -0.101883 | 1.616340  |
| 8    | -3.130535 | -0.241923 | 1.268547  |
| 1    | -2.865976 | -0.778382 | 0.488204  |
| 1    | 2.426452  | -1.179138 | -0.142770 |
| 8    | 3.278863  | -0.810050 | 0.202840  |
| 1    | 2.971798  | -0.284756 | 0.960632  |
| 1    | 1.022852  | 0.567485  | 1.677869  |
| 8    | 1.822063  | 1.119388  | 1.876471  |
| 1    | 1.937838  | 1.607326  | 1.045133  |
| 1    | -2.959267 | 1.408057  | 0.037874  |
| 8    | -2.619300 | 2.034184  | -0.620394 |
| 1    | -1.775458 | 1.604452  | -0.874154 |

5.6.4-5

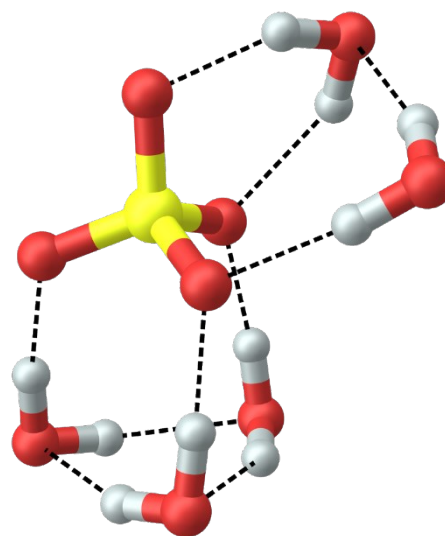

| atom | x         | y         | z         |
|------|-----------|-----------|-----------|
| 8    | 0.304867  | 0.098454  | 1.203423  |
| 16   | 0.364977  | -0.807258 | -0.000197 |
| 8    | 0.255850  | 0.058382  | -1.226069 |
| 8    | -0.771250 | -1.761677 | 0.044220  |
| 8    | 1.650628  | -1.534619 | -0.013560 |
| 1    | -1.286446 | 0.752467  | 1.551827  |
| 8    | -2.213732 | 1.090659  | 1.632143  |
| 1    | -2.729231 | 0.379327  | 1.218988  |
| 1    | 3.444166  | 0.898140  | -0.002961 |
| 8    | 3.950566  | 0.070086  | -0.017362 |
| 1    | 3.217918  | -0.585089 | -0.017520 |
| 1    | -2.407211 | -1.279334 | -0.193873 |
| 8    | -3.300384 | -0.868637 | -0.323309 |
| 1    | -3.075896 | -0.093096 | -0.864412 |
| 1    | -1.183470 | 1.036911  | -1.353591 |
| 8    | -2.015816 | 1.572321  | -1.297200 |
| 1    | -2.077092 | 1.740003  | -0.342946 |
| 1    | 1.417207  | 1.668047  | -0.755153 |
| 8    | 1.821527  | 2.124737  | 0.004714  |
| 1    | 1.382375  | 1.601099  | 0.706791  |

5.6.4-6 (5-VI) (=5-V)

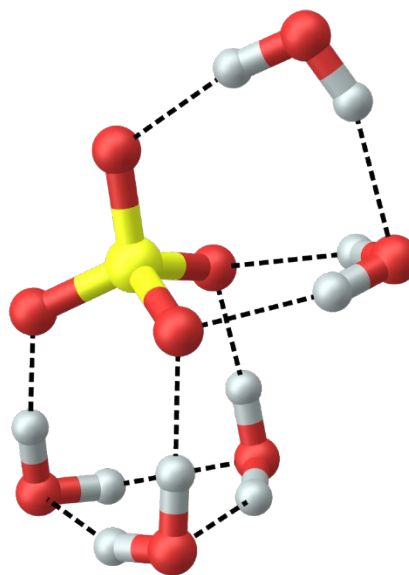

| atom | x         | y         | z         |
|------|-----------|-----------|-----------|
| 8    | -2.280830 | -1.092555 | -0.040179 |
| 16   | -0.840568 | -0.750937 | -0.023272 |
| 8    | -0.690470 | 0.758613  | 0.020370  |
| 8    | -0.172256 | -1.256153 | -1.253756 |
| 8    | -0.183389 | -1.321399 | 1.183807  |
| 1    | 1.487653  | -0.896799 | -1.521112 |
| 8    | 2.410213  | -0.541617 | -1.616237 |
| 1    | 2.243133  | 0.416306  | -1.588367 |
| 1    | 2.656199  | -0.853685 | 0.298443  |
| 8    | 2.504134  | -0.953635 | 1.256564  |
| 1    | 1.537352  | -1.175393 | 1.283967  |
| 1    | -2.591702 | 1.656568  | 0.036615  |
| 8    | -3.524074 | 1.387504  | 0.021973  |
| 1    | -3.358761 | 0.421060  | -0.004072 |
| 1    | 0.570390  | 1.374438  | 1.274439  |
| 8    | 1.427272  | 1.673217  | 1.650224  |
| 1    | 1.935614  | 0.838987  | 1.645401  |
| 1    | 1.668099  | 2.223562  | -0.274152 |
| 8    | 1.355922  | 2.143112  | -1.191781 |
| 1    | 0.528943  | 1.633260  | -1.026693 |

5.6.4-7 (= 5.6.4-8)

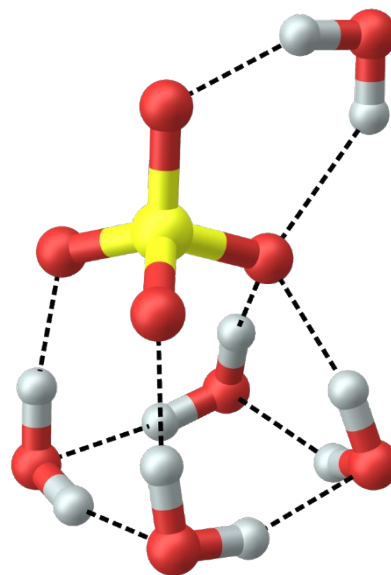



| atom | x         | y         | z         |
|------|-----------|-----------|-----------|
| 16   | -0.503012 | 0.000591  | 0.335967  |
| 8    | 0.268930  | 0.000393  | 1.603893  |
| 8    | -1.965586 | -0.001921 | 0.622461  |
| 8    | -0.157135 | 1.221868  | -0.461016 |
| 8    | -0.153881 | -1.217691 | -0.464095 |
| 8    | -2.682228 | -2.534149 | -0.421525 |
| 1    | -1.736695 | -2.435879 | -0.631445 |
| 1    | -2.784880 | -1.672513 | 0.024070  |
| 8    | 2.395887  | -1.223871 | -1.445700 |
| 1    | 2.519626  | -0.262055 | -1.498551 |
| 1    | 1.455996  | -1.292457 | -1.142201 |
| 8    | -2.694680 | 2.523832  | -0.425170 |
| 1    | -1.747471 | 2.433886  | -0.630865 |
| 1    | -2.791892 | 1.660944  | 0.019410  |
| 8    | 2.527947  | 1.646774  | -0.731456 |
| 1    | 2.819888  | 1.189684  | 0.074266  |
| 1    | 1.542794  | 1.576414  | -0.661763 |
| 8    | 2.944337  | -0.416097 | 1.350253  |
| 1    | 2.923289  | -0.921885 | 0.521593  |
| 1    | 1.978805  | -0.278708 | 1.528845  |

5.7.3-1 (5-III)

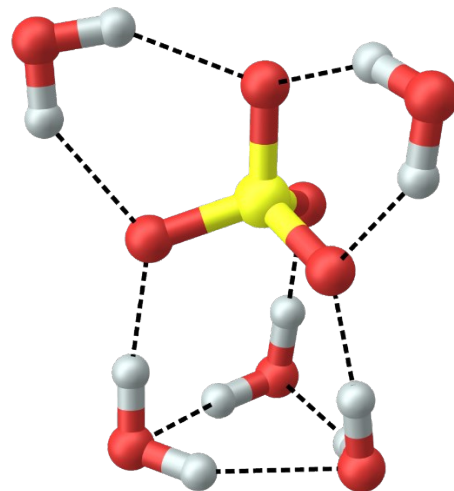

## 5.7.3-2

| atom | x         | y         | z         |
|------|-----------|-----------|-----------|
| 8    | -1.584977 | -1.469615 | 0.436667  |
| 16   | -0.679504 | -0.358753 | 0.085035  |
| 8    | 0.096378  | 0.095239  | 1.283700  |
| 8    | -1.475160 | 0.806864  | -0.433361 |
| 8    | 0.286699  | -0.785224 | -0.977829 |
| 1    | 1.867018  | 0.030265  | 1.287069  |
| 8    | 2.835438  | 0.134089  | 1.124275  |
| 1    | 2.822323  | 0.601465  | 0.270904  |
| 1    | 1.657532  | -2.020858 | -0.619762 |
| 8    | 2.521085  | -2.397126 | -0.351384 |
| 1    | 2.844826  | -1.685833 | 0.224912  |
| 1    | -3.436366 | -0.980107 | 0.134987  |
| 8    | -4.080051 | -0.308210 | -0.161796 |
| 1    | -3.422370 | 0.375326  | -0.383300 |
| 1    | 1.456291  | 2.026445  | -0.915953 |
| 8    | 2.001781  | 1.374639  | -1.389284 |
| 1    | 1.419760  | 0.578487  | -1.377262 |
| 1    | 0.411057  | 2.196423  | 1.019540  |
| 8    | 0.127634  | 2.841045  | 0.351401  |
| 1    | -0.578624 | 2.284824  | -0.060811 |

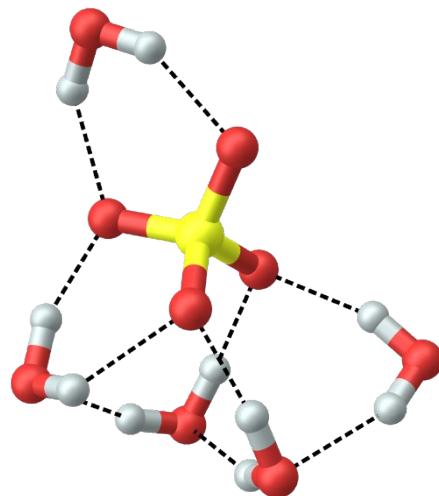

| atom | x         | y         | z         |
|------|-----------|-----------|-----------|
| 16   | -0.779378 | 0.318455  | 0.065206  |
| 8    | 0.224534  | -0.057965 | 1.129580  |
| 8    | -0.142989 | 1.318589  | -0.842356 |
| 8    | -1.124986 | -0.909114 | -0.718860 |
| 8    | -1.991451 | 0.879749  | 0.696377  |
| 8    | 1.350739  | 3.477121  | -0.025150 |
| 1    | 2.034993  | 2.866433  | 0.274926  |
| 1    | 0.648917  | 2.834588  | -0.284172 |
| 8    | 2.558609  | 0.647076  | 0.007568  |
| 1    | 0.629487  | -1.928089 | 1.008989  |
| 1    | 2.033524  | 0.903731  | -0.765499 |
| 8    | 0.604801  | -2.725064 | 0.442544  |
| 1    | -0.036892 | -2.363921 | -0.204126 |
| 1    | 1.800593  | 0.369785  | 0.589257  |
| 8    | -3.954868 | -0.842277 | -0.343899 |
| 1    | -3.564298 | -0.099467 | 0.156343  |
| 1    | -3.113354 | -1.188089 | -0.690783 |
| 8    | 3.284823  | -2.143604 | -0.419368 |
| 1    | 3.174523  | -1.179051 | -0.337936 |
| 1    | 2.388854  | -2.467300 | -0.201772 |

5.7.3-3 (new)

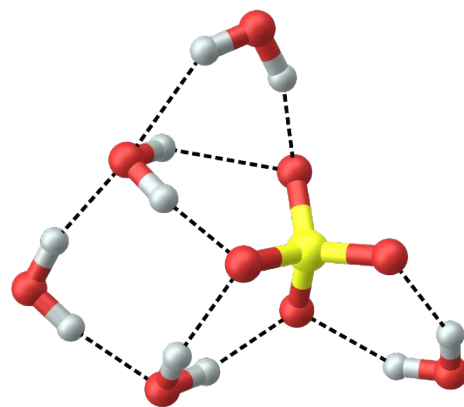

| atom | x         | y         | z         |
|------|-----------|-----------|-----------|
| 16   | 0.000000  | 0.302697  | -0.125842 |
| 8    | 0.000000  | -0.306553 | 1.242987  |
| 8    | -1.222159 | 1.145378  | -0.288658 |
| 8    | 0.000001  | -0.785023 | -1.145232 |
| 8    | 1.222158  | 1.145380  | -0.288658 |
| 8    | -2.802636 | -0.369685 | 1.448054  |
| 8    | -0.000002 | 3.680515  | -0.665946 |
| 8    | 2.802636  | -0.369683 | 1.448054  |
| 8    | 2.436715  | -2.268721 | -0.847770 |
| 8    | -2.436713 | -2.268723 | -0.847770 |
| 1    | -1.880601 | -0.582099 | 1.692784  |
| 1    | -2.587657 | 0.312758  | 0.780944  |
| 1    | 0.726419  | 3.038019  | -0.569362 |
| 1    | -0.726421 | 3.038018  | -0.569362 |
| 1    | 1.880601  | -0.582097 | 1.692784  |
| 1    | 2.587657  | 0.312760  | 0.780944  |
| 1    | 2.729215  | -1.764631 | -0.072491 |
| 1    | 1.579792  | -1.837153 | -1.045383 |
| 1    | -1.579790 | -1.837155 | -1.045383 |
| 1    | -2.729213 | -1.764633 | -0.072492 |

5.8.2-1 (new)

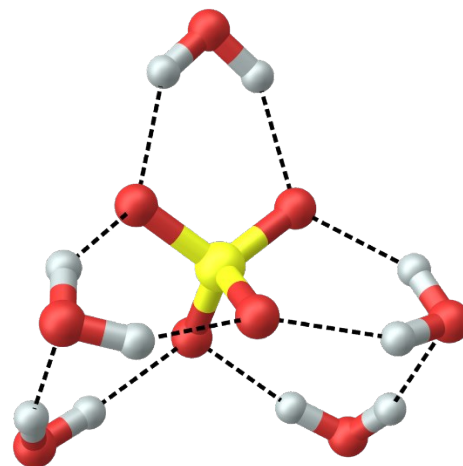

| atom | x         | y         | z         |
|------|-----------|-----------|-----------|
| 16   | -0.043081 | -0.033949 | 0.000000  |
| 8    | -0.484250 | -1.467260 | 0.000000  |
| 8    | 0.781408  | 0.234768  | 1.216228  |
| 8    | 0.781408  | 0.234768  | -1.216228 |
| 8    | -1.238783 | 0.853613  | 0.000000  |
| 1    | -2.502314 | -1.572986 | 0.000000  |
| 8    | -3.326137 | -1.056336 | 0.000000  |
| 1    | -2.906776 | -0.176174 | 0.000000  |
| 1    | 1.957818  | 1.706953  | 0.730261  |
| 8    | 2.304779  | 2.256310  | 0.000000  |
| 1    | 1.957818  | 1.706953  | -0.730261 |
| 1    | -0.792954 | 2.685401  | 0.000000  |
| 8    | -0.384634 | 3.576245  | 0.000000  |
| 1    | 0.558960  | 3.350520  | 0.000000  |
| 1    | 0.974704  | -1.346929 | -2.307307 |
| 8    | 0.781408  | -2.291753 | -2.458807 |
| 1    | 0.247235  | -2.426222 | -1.658545 |
| 1    | 0.974704  | -1.346929 | 2.307307  |
| 8    | 0.781408  | -2.291753 | 2.458807  |
| 1    | 0.247235  | -2.426222 | 1.658545  |

5.9.1-1 (5-II)

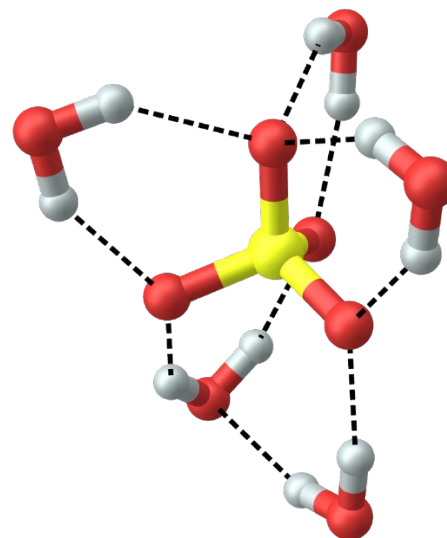

| atom | x         | y         | z         |
|------|-----------|-----------|-----------|
| 8    | -1.220672 | 0.000000  | 1.143414  |
| 16   | 0.000000  | 0.000000  | 0.291360  |
| 8    | 0.000000  | 1.222656  | -0.578304 |
| 8    | 0.000000  | -1.222656 | -0.578304 |
| 8    | 1.220672  | 0.000000  | 1.143414  |
| 1    | 2.274293  | -1.617532 | 0.885108  |
| 8    | 2.394987  | -2.468885 | 0.425001  |
| 1    | 1.605318  | -2.405317 | -0.137604 |
| 1    | -2.274293 | 1.617532  | 0.885108  |
| 8    | -2.394987 | 2.468885  | 0.425001  |
| 1    | -1.605318 | 2.405317  | -0.137604 |
| 1    | 0.000000  | -0.726984 | -2.511875 |
| 8    | 0.000000  | 0.000000  | -3.158730 |
| 1    | 0.000000  | 0.726984  | -2.511875 |
| 1    | -1.605318 | -2.405317 | -0.137604 |
| 8    | -2.394987 | -2.468885 | 0.425001  |
| 1    | -2.274293 | -1.617532 | 0.885108  |
| 1    | 2.274293  | 1.617532  | 0.885108  |
| 8    | 2.394987  | 2.468885  | 0.425001  |
| 1    | 1.605318  | 2.405317  | -0.137604 |

### 5.10.0-1 (5-I)

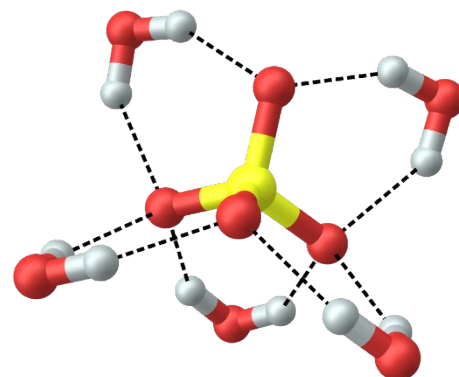

Supplement: d0cp04386a4.pdf [file d0cp04386a4.pdf]
