# Supplementary material for: Cryogenic ion trap vibrational spectroscopy of the microhydrated sulfate dianions SO42−(H2O)3−8
Source: Royal Society of Chemistry journal article supplement (doi:10.1039/d0cp04386a), 2020-01-01

## Structures of $\text{SO}_4^{2-}(\text{H}_2\text{O})_6$

| atom | x         | y         | z         |
|------|-----------|-----------|-----------|
| 8    | 1.367769  | -1.033708 | -1.266101 |
| 16   | 0.104667  | -0.558772 | -0.651051 |
| 8    | 0.317277  | -0.409811 | 0.837632  |
| 8    | -0.989715 | -1.525892 | -0.892922 |
| 8    | -0.261150 | 0.775842  | -1.213678 |
| 1    | 1.695784  | 0.627281  | 1.296879  |
| 8    | 2.596233  | 1.002626  | 1.445832  |
| 1    | 3.141651  | 0.293138  | 1.076316  |
| 1    | -2.532802 | -1.427594 | -0.096178 |
| 8    | -3.363440 | -1.236422 | 0.405067  |
| 1    | -3.015241 | -0.775523 | 1.186772  |
| 1    | 2.189102  | 2.303047  | -0.052341 |
| 8    | 1.771370  | 2.761017  | -0.798888 |
| 1    | 1.061788  | 2.134155  | -1.043500 |
| 1    | -3.210724 | 0.643281  | -0.429903 |
| 8    | -2.830895 | 1.530311  | -0.536477 |
| 1    | -1.912905 | 1.334147  | -0.840762 |
| 1    | -1.072284 | 0.249632  | 1.746619  |
| 8    | -1.902764 | 0.630068  | 2.118712  |
| 1    | -2.202692 | 1.204566  | 1.395008  |
| 1    | 2.575757  | -1.537246 | -0.213314 |
| 8    | 3.178976  | -1.780566 | 0.542137  |
| 1    | 2.538605  | -1.816252 | 1.260715  |

6.6.5-1

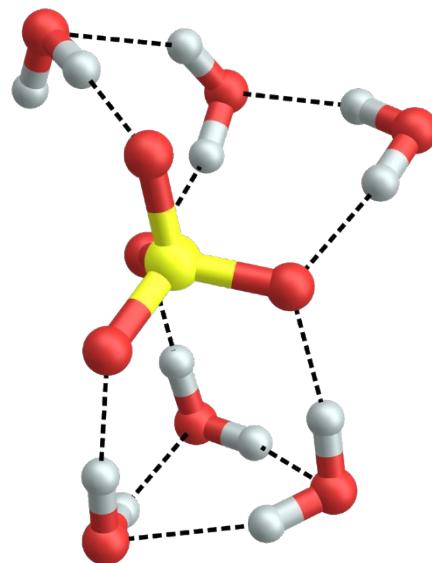

| atom | x         | y         | z         |
|------|-----------|-----------|-----------|
| 8    | 1.216420  | -1.767009 | 0.008507  |
| 16   | 0.000000  | -0.924726 | 0.000001  |
| 8    | -1.216420 | -1.767008 | -0.008502 |
| 8    | 0.005607  | -0.040476 | -1.216897 |
| 8    | -0.005607 | -0.040471 | 1.216895  |
| 1    | 3.004947  | 0.512711  | 1.200264  |
| 8    | 2.442865  | 1.158486  | 1.658370  |
| 1    | 1.548172  | 0.747973  | 1.589909  |
| 1    | 1.321748  | 1.152155  | -1.301388 |
| 8    | 2.100174  | 1.754292  | -1.223066 |
| 1    | 2.170062  | 1.871656  | -0.261692 |
| 1    | -1.321747 | 1.152161  | 1.301382  |
| 8    | -2.100173 | 1.754298  | 1.223058  |
| 1    | -2.170062 | 1.871657  | 0.261684  |
| 1    | -3.004948 | 0.512704  | -1.200262 |
| 8    | -2.442867 | 1.158477  | -1.658372 |
| 1    | -1.548174 | 0.747965  | -1.589911 |
| 1    | 2.802072  | -1.107939 | -0.274348 |
| 8    | 3.639380  | -0.599093 | -0.408266 |
| 1    | 3.320580  | 0.171633  | -0.907402 |
| 1    | -2.802071 | -1.107937 | 0.274355  |
| 8    | -3.639379 | -0.599091 | 0.408274  |
| 1    | -3.320577 | 0.171637  | 0.907405  |

6.6.6-1 (6-IV)

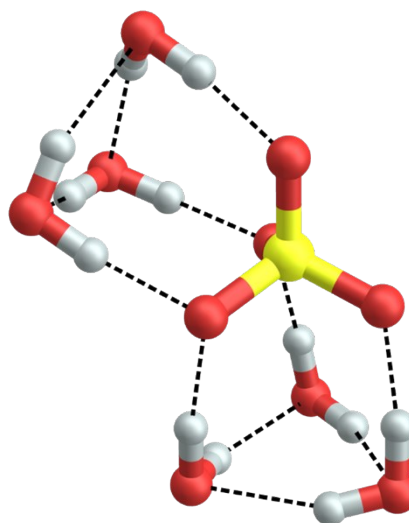

## 6.6.6-2

| atom | x         | y         | z         |
|------|-----------|-----------|-----------|
| 8    | -0.000001 | -0.009967 | 1.207953  |
| 16   | 0.000000  | -0.912640 | 0.004634  |
| 8    | 1.215806  | -1.755668 | 0.020137  |
| 8    | 0.000001  | -0.046917 | -1.225544 |
| 8    | -1.215806 | -1.755668 | 0.020134  |
| 1    | 3.000126  | 0.553599  | 1.202727  |
| 8    | 2.431111  | 1.220631  | 1.620024  |
| 1    | 1.537164  | 0.806302  | 1.557258  |
| 1    | 2.817026  | -1.123820 | -0.218906 |
| 8    | 3.662759  | -0.627426 | -0.346968 |
| 1    | 3.362529  | 0.126209  | -0.882614 |
| 1    | -2.817025 | -1.123819 | -0.218911 |
| 8    | -3.662757 | -0.627423 | -0.346975 |
| 1    | -3.362525 | 0.126214  | -0.882617 |
| 1    | -1.365810 | 1.100576  | -1.353629 |
| 8    | -2.154363 | 1.689827  | -1.286003 |
| 1    | -2.206829 | 1.846888  | -0.329004 |
| 1    | -1.537168 | 0.806298  | 1.557259  |
| 8    | -2.431115 | 1.220625  | 1.620026  |
| 1    | -3.000128 | 0.553594  | 1.202724  |
| 1    | 1.365813  | 1.100574  | -1.353632 |
| 8    | 2.154366  | 1.689826  | -1.286008 |
| 1    | 2.206831  | 1.846889  | -0.329010 |

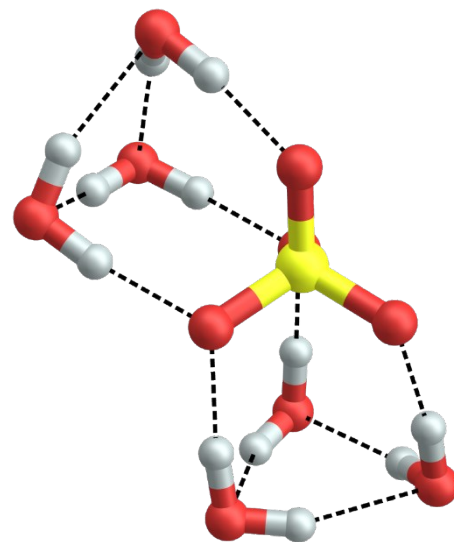

## 6.6.6-3

| atom | x         | y         | z         |
|------|-----------|-----------|-----------|
| 8    | -0.549372 | -0.100042 | -1.223571 |
| 16   | -0.819727 | -0.984952 | -0.030731 |
| 8    | -2.249968 | -1.353228 | -0.014008 |
| 8    | -0.492331 | -0.195510 | 1.208675  |
| 8    | 0.045086  | -2.184672 | -0.101890 |
| 1    | 1.007857  | 2.586961  | -0.111544 |
| 8    | 1.975419  | 2.527264  | -0.216037 |
| 1    | 2.087823  | 1.773751  | -0.837946 |
| 1    | 2.146362  | 1.248877  | 1.299516  |
| 8    | 2.040638  | 0.505061  | 1.917496  |
| 1    | 1.121762  | 0.194562  | 1.722829  |
| 1    | -0.863322 | 1.607181  | -0.677965 |
| 8    | -0.930868 | 2.273343  | 0.044755  |
| 1    | -0.831278 | 1.637175  | 0.782843  |
| 1    | 1.787653  | -1.956093 | 0.079176  |
| 8    | 2.731269  | -1.683561 | 0.185808  |
| 1    | 2.665869  | -0.982258 | 0.860783  |
| 1    | 2.472090  | -0.427656 | -1.254123 |
| 8    | 2.079556  | 0.245870  | -1.841653 |
| 1    | 1.111439  | 0.087086  | -1.709448 |
| 1    | -3.054152 | 1.612461  | 0.065566  |
| 8    | -3.799046 | 0.996694  | 0.069283  |
| 1    | -3.339522 | 0.127434  | 0.041131  |

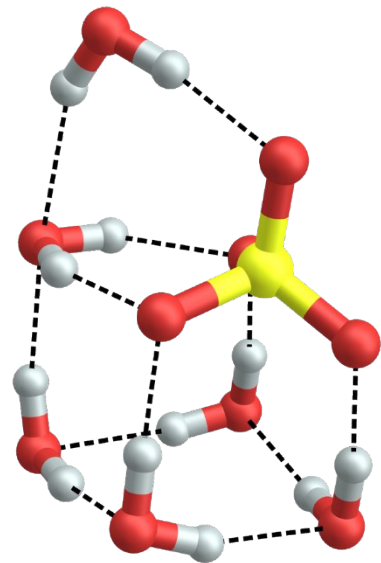

## 6.6.6-4

| atom | x         | y         | z         |
|------|-----------|-----------|-----------|
| 8    | 0.729600  | -2.411081 | 0.279399  |
| 16   | -0.201084 | -1.269976 | 0.133317  |
| 8    | -1.606488 | -1.734893 | 0.034762  |
| 8    | 0.156394  | -0.490865 | -1.103115 |
| 8    | -0.063196 | -0.350359 | 1.315168  |
| 1    | -2.629494 | 0.787522  | -1.295662 |
| 8    | -3.276522 | 0.185372  | -0.902857 |
| 1    | -2.711244 | -0.575947 | -0.610589 |
| 1    | 2.133885  | -0.728626 | -1.363153 |
| 8    | 2.887734  | -1.211707 | -0.978344 |
| 1    | 2.361730  | -1.846639 | -0.446480 |
| 1    | -0.385929 | 1.135042  | -1.114781 |
| 8    | -0.776392 | 2.046594  | -1.071916 |
| 1    | -1.142030 | 2.082021  | -0.170998 |
| 1    | 0.968554  | 2.902704  | -0.653637 |
| 8    | 1.843433  | 3.175795  | -0.327016 |
| 1    | 2.126384  | 2.402686  | 0.199035  |
| 1    | -1.378446 | 0.801876  | 1.541306  |
| 8    | -2.107203 | 1.466748  | 1.486631  |
| 1    | -2.730566 | 1.042249  | 0.875608  |
| 1    | 1.577633  | 0.443905  | 1.306796  |
| 8    | 2.488442  | 0.786607  | 1.157451  |
| 1    | 2.820457  | 0.175127  | 0.478187  |

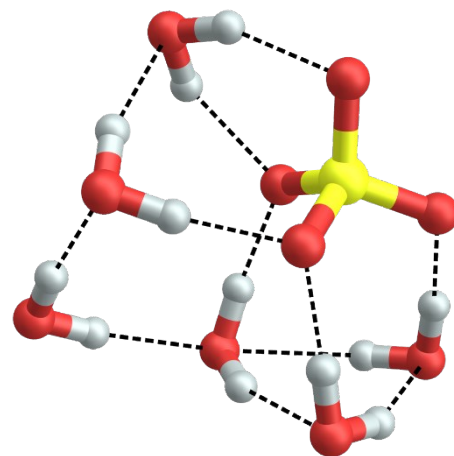

## 6.6.6-5

| atom | x         | y         | z         |
|------|-----------|-----------|-----------|
| 8    | -0.322977 | -0.493379 | 1.233773  |
| 16   | -0.443401 | -1.159530 | -0.110147 |
| 8    | -0.292052 | -0.083537 | -1.158545 |
| 8    | -1.766645 | -1.797520 | -0.239664 |
| 8    | 0.640883  | -2.158638 | -0.270922 |
| 1    | 1.320658  | -0.138414 | 1.704307  |
| 8    | 2.273807  | 0.104754  | 1.819295  |
| 1    | 2.726677  | -0.524772 | 1.236127  |
| 1    | -3.426859 | 0.713004  | 0.190012  |
| 8    | -3.963635 | -0.085777 | 0.084926  |
| 1    | -3.264688 | -0.766356 | -0.032544 |
| 1    | -1.277301 | 1.241024  | 0.979686  |
| 8    | -1.646451 | 1.830832  | 0.293715  |
| 1    | -1.312333 | 1.331605  | -0.484064 |
| 1    | -0.396608 | 3.315404  | -0.007520 |
| 8    | 0.370524  | 3.845346  | -0.288299 |
| 1    | 1.018747  | 3.148526  | -0.499444 |
| 1    | 3.004819  | -0.425722 | -0.943882 |
| 8    | 3.179058  | -1.321553 | -0.621352 |
| 1    | 2.262942  | -1.695592 | -0.543263 |
| 1    | 1.126146  | 0.901737  | -0.957454 |
| 8    | 1.931318  | 1.438960  | -0.737802 |
| 1    | 2.081568  | 1.216131  | 0.199391  |

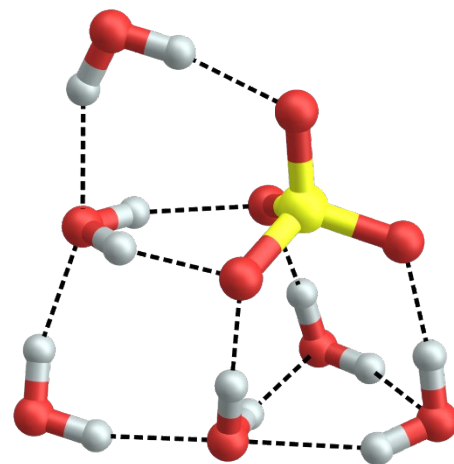

| atom | x         | y         | z         |
|------|-----------|-----------|-----------|
| 8    | -2.995869 | -1.916503 | 1.307950  |
| 8    | -0.505143 | -1.313641 | 0.290159  |
| 16   | 0.241070  | -0.898954 | -0.946255 |
| 8    | 0.379604  | -2.021210 | -1.871144 |
| 8    | -0.498097 | 0.242253  | -1.585487 |
| 8    | 1.588194  | -0.384245 | -0.519787 |
| 8    | 1.456655  | 1.583779  | 1.324730  |
| 8    | -1.248780 | 0.666453  | 1.972981  |
| 8    | -2.244355 | 1.974187  | -0.387049 |
| 8    | 3.410234  | -0.841871 | 1.532035  |
| 8    | 0.419283  | 2.839284  | -1.085705 |
| 1    | -2.179323 | -1.904199 | 0.763810  |
| 1    | -2.889982 | -1.091498 | 1.796126  |
| 1    | -0.908432 | -0.086898 | 1.424059  |
| 1    | -1.689582 | 1.216587  | 1.299166  |
| 1    | -1.850158 | 1.179109  | -0.815648 |
| 1    | -1.509863 | 2.597531  | -0.516403 |
| 1    | 0.241269  | 1.932448  | -1.423068 |
| 1    | 0.861881  | 2.645027  | -0.240935 |
| 1    | 1.527113  | 0.877886  | 0.628224  |
| 1    | 0.591382  | 1.388656  | 1.726879  |
| 1    | 2.822180  | -0.959967 | 0.756233  |
| 1    | 3.032579  | -0.039295 | 1.912182  |

6.6.6-6 (6-VII)

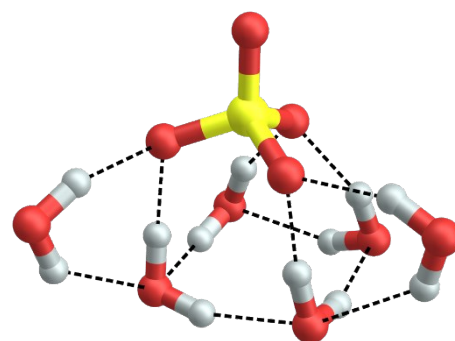



| atom | x         | y         | z         |
|------|-----------|-----------|-----------|
| 8    | 0.206368  | -0.858687 | -1.184662 |
| 16   | 1.030688  | -0.495817 | 0.019516  |
| 8    | 2.246457  | -1.330738 | 0.067732  |
| 8    | 0.197163  | -0.727495 | 1.245278  |
| 8    | 1.398664  | 0.949296  | -0.061494 |
| 1    | -2.985671 | -1.121045 | -0.140525 |
| 8    | -3.507843 | -0.303400 | -0.267819 |
| 1    | -2.952708 | 0.211212  | -0.894016 |
| 1    | -2.577400 | 0.531197  | 1.256991  |
| 8    | -1.932928 | 0.879729  | 1.898246  |
| 1    | -1.128100 | 0.335860  | 1.721351  |
| 1    | -1.090610 | -2.086384 | -0.649602 |
| 8    | -1.663952 | -2.452857 | 0.058150  |
| 1    | -1.172825 | -2.060033 | 0.805152  |
| 1    | 0.165140  | 2.188580  | 0.085457  |
| 8    | -0.631070 | 2.767210  | 0.167709  |
| 1    | -1.152691 | 2.293056  | 0.842080  |
| 1    | -1.375964 | 1.771934  | -1.295107 |
| 8    | -1.651381 | 1.047204  | -1.888763 |
| 1    | -0.951149 | 0.370358  | -1.725061 |
| 1    | 3.466017  | 1.150496  | -0.088121 |
| 8    | 4.269407  | 0.605721  | -0.062243 |
| 1    | 3.817881  | -0.260027 | -0.007937 |

6.7.5-1 (=6.7.5-2) (6-VI)

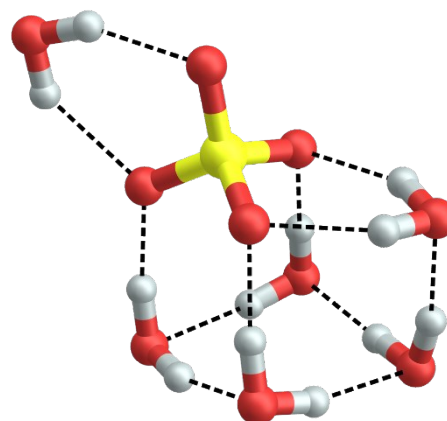

| atom | x         | y         | z         |
|------|-----------|-----------|-----------|
| 8    | 0.142782  | 0.030808  | -1.570810 |
| 16   | 1.038294  | -0.513948 | -0.490284 |
| 8    | 2.442775  | -0.488709 | -0.944032 |
| 8    | 0.611724  | -1.890715 | -0.150485 |
| 8    | 0.890126  | 0.374286  | 0.724280  |
| 1    | -2.037508 | 2.144712  | -0.184515 |
| 8    | -2.888201 | 1.729006  | 0.063649  |
| 1    | -2.871006 | 0.885561  | -0.439051 |
| 1    | -1.813548 | -1.437810 | 1.573003  |
| 8    | -1.822607 | -2.241959 | 1.021068  |
| 1    | -0.922329 | -2.213629 | 0.613567  |
| 1    | -0.171803 | 1.782690  | -1.252341 |
| 8    | -0.271245 | 2.568720  | -0.666790 |
| 1    | 0.203887  | 2.198240  | 0.097054  |
| 1    | -0.574942 | 0.324420  | 1.725005  |
| 8    | -1.439512 | 0.352627  | 2.199603  |
| 1    | -2.009885 | 0.856335  | 1.591914  |
| 1    | -2.425475 | -1.320889 | -0.551210 |
| 8    | -2.500204 | -0.700719 | -1.301854 |
| 1    | -1.554363 | -0.485230 | -1.485612 |
| 1    | 2.806894  | 0.874040  | 1.450428  |
| 8    | 3.733236  | 0.803032  | 1.171801  |
| 1    | 3.566387  | 0.323708  | 0.334870  |

6.7.5-3 (=6.7.5-4) (6-V)

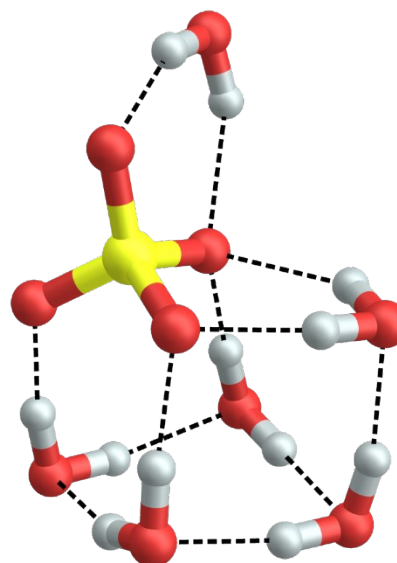

| atom | x         | y         | z         |
|------|-----------|-----------|-----------|
| 8    | -0.175639 | -1.222425 | 0.151952  |
| 16   | -0.095937 | -0.000618 | -0.710011 |
| 8    | -0.169271 | 1.215549  | 0.160432  |
| 8    | -1.213438 | 0.006556  | -1.680809 |
| 8    | 1.213212  | -0.001815 | -1.434654 |
| 1    | -1.539218 | -1.312724 | 1.269220  |
| 8    | -2.352360 | -1.243663 | 1.826147  |
| 1    | -2.439330 | -0.282967 | 1.938604  |
| 1    | -1.742708 | 1.574519  | 0.876362  |
| 8    | -2.659917 | 1.640505  | 1.237310  |
| 1    | -3.182992 | 1.197088  | 0.549568  |
| 1    | -2.844446 | -0.258857 | -1.104932 |
| 8    | -3.709670 | -0.389762 | -0.644408 |
| 1    | -3.443963 | -0.905472 | 0.134946  |
| 1    | 2.323330  | 1.339836  | -0.728791 |
| 8    | 2.529211  | 1.996273  | -0.031652 |
| 1    | 1.641745  | 2.009475  | 0.371004  |
| 1    | 3.674684  | -0.760595 | 0.936072  |
| 8    | 4.192954  | -0.001141 | 1.260846  |
| 1    | 3.675738  | 0.758090  | 0.933812  |
| 1    | 1.638665  | -2.012441 | 0.373667  |
| 8    | 2.526454  | -1.999203 | -0.028115 |
| 1    | 2.321213  | -1.343055 | -0.725753 |

6.7.5-5 (=6.7.5-6)

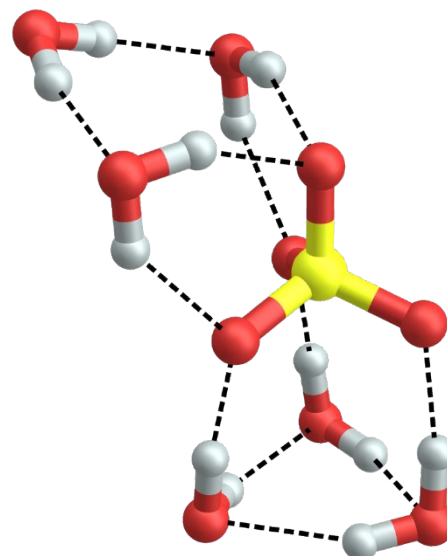

## 6.7.5-7

| atom | x         | y         | z         |
|------|-----------|-----------|-----------|
| 8    | -1.333643 | -1.896949 | -0.616569 |
| 16   | -0.178394 | -0.973048 | -0.504833 |
| 8    | 1.084982  | -1.648755 | -0.858693 |
| 8    | -0.103980 | -0.454614 | 0.910360  |
| 8    | -0.396664 | 0.201849  | -1.418203 |
| 1    | -2.968694 | 0.885884  | 0.020859  |
| 8    | -2.635994 | 1.578794  | -0.575290 |
| 1    | -1.873288 | 1.121251  | -1.002521 |
| 1    | -2.180360 | -0.454297 | 1.613396  |
| 8    | -3.005115 | -0.747591 | 1.197025  |
| 1    | -2.601924 | -1.289433 | 0.475820  |
| 1    | 0.972510  | 2.476206  | -0.187545 |
| 8    | 1.408739  | 2.229498  | -1.020882 |
| 1    | 0.818861  | 1.495568  | -1.313453 |
| 1    | -0.212954 | 1.320243  | 1.220651  |
| 8    | -0.441090 | 2.276868  | 1.243499  |
| 1    | -1.231124 | 2.290412  | 0.676131  |
| 1    | 2.921073  | -0.308791 | 1.416827  |
| 8    | 2.444331  | -0.524302 | 2.236089  |
| 1    | 1.531341  | -0.603381 | 1.899482  |
| 1    | 2.791220  | 0.873897  | -0.646943 |
| 8    | 3.269286  | 0.034047  | -0.523282 |
| 1    | 2.560840  | -0.629549 | -0.687817 |

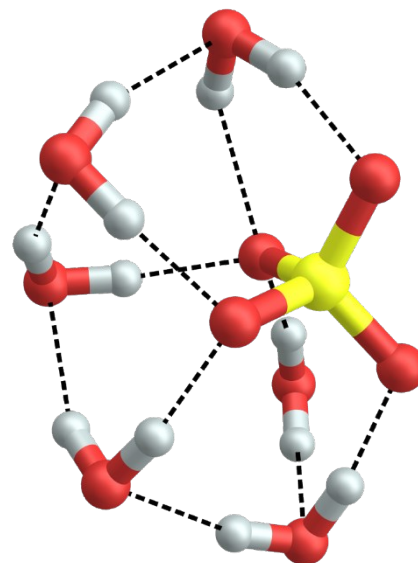

| atom | x         | y         | z         |
|------|-----------|-----------|-----------|
| 8    | 0.554625  | 0.939950  | -0.834556 |
| 16   | 0.506413  | -0.522893 | -0.517317 |
| 8    | 1.640593  | -1.217848 | -1.164124 |
| 8    | -0.792105 | -1.081982 | -1.003458 |
| 8    | 0.591403  | -0.701022 | 0.968315  |
| 1    | -2.245046 | -0.098293 | -1.511500 |
| 8    | -3.156135 | 0.257643  | -1.405464 |
| 1    | -3.418601 | -0.229635 | -0.605727 |
| 1    | -2.082085 | -1.548261 | 0.297323  |
| 8    | -2.847463 | -1.451961 | 0.902158  |
| 1    | -2.504462 | -0.784086 | 1.528779  |
| 1    | -1.589708 | 1.289974  | 1.654121  |
| 8    | -1.434586 | 0.580381  | 2.305749  |
| 1    | -0.646720 | 0.124473  | 1.922096  |
| 1    | 2.601610  | -0.792017 | 1.366140  |
| 8    | 3.447465  | -0.908307 | 0.898758  |
| 1    | 3.067680  | -1.128214 | 0.020268  |
| 1    | -0.806110 | 1.918382  | -0.271586 |
| 8    | -1.662579 | 2.321659  | 0.011190  |
| 1    | -2.305630 | 1.779049  | -0.476988 |
| 1    | 2.265127  | 1.686626  | -0.414150 |
| 8    | 3.172950  | 1.898232  | -0.116852 |
| 1    | 3.447999  | 1.054329  | 0.274574  |

6.7.5-8

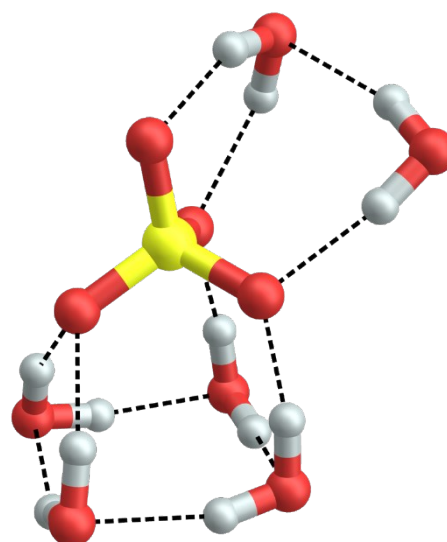

## 6.7.5-9

| atom | x         | y         | z         |
|------|-----------|-----------|-----------|
| 8    | 0.562363  | 0.301527  | -1.329471 |
| 16   | 0.482896  | -0.850650 | -0.376721 |
| 8    | 0.223698  | -0.294684 | 1.004411  |
| 8    | 1.767233  | -1.587893 | -0.366352 |
| 8    | -0.630405 | -1.749379 | -0.763604 |
| 1    | -0.478549 | 1.476976  | 1.067633  |
| 8    | -1.143017 | 2.196508  | 1.092483  |
| 1    | -1.477395 | 2.175610  | 0.174716  |
| 1    | 3.214081  | 1.218543  | -0.008920 |
| 8    | 3.008248  | 1.723610  | -0.810632 |
| 1    | 2.168572  | 1.307948  | -1.092552 |
| 1    | -3.108174 | -0.615082 | 0.385110  |
| 8    | -3.167613 | -0.828540 | -0.562304 |
| 1    | -2.273473 | -1.222715 | -0.722196 |
| 1    | -0.989751 | 1.145719  | -1.602653 |
| 8    | -1.885914 | 1.558578  | -1.589287 |
| 1    | -2.455263 | 0.811795  | -1.325333 |
| 1    | 2.217819  | 0.091023  | 1.790450  |
| 8    | 3.113604  | -0.168741 | 1.525316  |
| 1    | 2.856587  | -0.802773 | 0.814793  |
| 1    | -2.198166 | 0.767227  | 1.951413  |
| 8    | -2.316900 | -0.179775 | 2.146326  |
| 1    | -1.453003 | -0.513556 | 1.819984  |

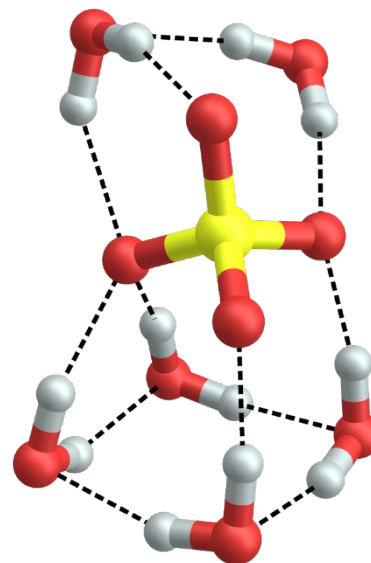

| atom | x         | y         | z         |
|------|-----------|-----------|-----------|
| 8    | -0.656662 | -0.308272 | 0.724243  |
| 16   | -0.838116 | -0.204998 | -0.777237 |
| 8    | -0.147365 | 1.041033  | -1.237742 |
| 8    | -2.277411 | -0.141397 | -1.091443 |
| 8    | -0.206068 | -1.384434 | -1.418535 |
| 1    | 1.647316  | 0.947401  | -1.120988 |
| 8    | 2.587301  | 0.804780  | -0.860796 |
| 1    | 2.652258  | -0.168690 | -0.835223 |
| 1    | -3.343451 | -0.470889 | 0.408258  |
| 8    | -3.512634 | -0.636686 | 1.358567  |
| 1    | -2.591788 | -0.590452 | 1.654944  |
| 1    | 1.398018  | -1.859799 | -1.018720 |
| 8    | 2.302332  | -2.054336 | -0.661498 |
| 1    | 2.131573  | -2.077710 | 0.295429  |
| 1    | 0.606512  | 0.805901  | 1.406654  |
| 8    | 1.443828  | 1.226050  | 1.711057  |
| 1    | 1.995365  | 1.165120  | 0.904979  |
| 1    | -0.221777 | 2.681298  | -0.356071 |
| 8    | -0.005895 | 3.434376  | 0.232519  |
| 1    | 0.516488  | 2.986088  | 0.912342  |
| 1    | 0.480742  | -1.444492 | 1.538453  |
| 8    | 1.282422  | -1.713012 | 2.046144  |
| 1    | 1.659820  | -0.838617 | 2.225611  |

6.7.5-10

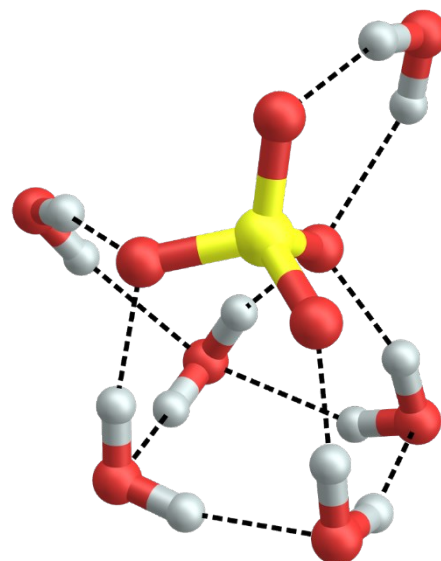

| atom | x         | y         | z         |
|------|-----------|-----------|-----------|
| 8    | 0.285126  | -0.114300 | 0.849766  |
| 16   | -0.083920 | -0.846317 | -0.427068 |
| 8    | -0.387397 | 0.181973  | -1.471782 |
| 8    | -1.276275 | -1.687044 | -0.175707 |
| 8    | 1.063158  | -1.677235 | -0.854066 |
| 1    | 3.908139  | 0.272481  | 0.373846  |
| 8    | 4.204565  | 1.138342  | 0.035585  |
| 1    | 3.360643  | 1.546222  | -0.233233 |
| 1    | -1.727956 | 1.280915  | -1.124619 |
| 8    | -2.463248 | 1.853123  | -0.795151 |
| 1    | -2.261588 | 1.908273  | 0.152678  |
| 1    | 2.442383  | -1.550951 | 0.259179  |
| 8    | 2.939542  | -1.252961 | 1.057542  |
| 1    | 2.210869  | -0.765136 | 1.472704  |
| 1    | -2.879046 | -1.066162 | 0.060616  |
| 8    | -3.722915 | -0.573344 | 0.212635  |
| 1    | -3.556176 | 0.246611  | -0.282365 |
| 1    | 1.175345  | 1.469780  | 0.282125  |
| 8    | 1.507471  | 2.070947  | -0.415252 |
| 1    | 1.023983  | 1.675460  | -1.159903 |
| 1    | -1.133101 | 0.607089  | 1.680500  |
| 8    | -1.972016 | 1.000975  | 2.016635  |
| 1    | -2.644874 | 0.392678  | 1.669906  |

6.7.5-11

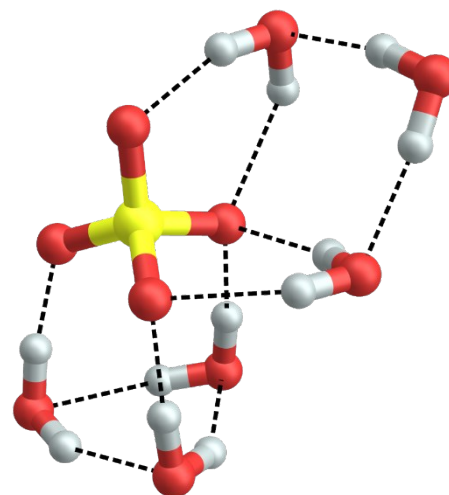



| atom | x         | y         | z         |
|------|-----------|-----------|-----------|
| 8    | 0.020571  | -0.939615 | 0.642348  |
| 16   | 0.080299  | -0.201725 | -0.669034 |
| 8    | -0.124999 | 1.253882  | -0.404798 |
| 8    | -0.979749 | -0.708531 | -1.568823 |
| 8    | 1.418052  | -0.423197 | -1.281102 |
| 1    | -3.405828 | 0.645790  | -0.419943 |
| 8    | -3.572914 | -0.174327 | -0.914290 |
| 1    | -2.665867 | -0.399328 | -1.236924 |
| 1    | 3.468480  | -0.409518 | 0.758672  |
| 8    | 3.651339  | 0.240878  | 0.067044  |
| 1    | 2.860549  | 0.104196  | -0.515648 |
| 1    | -1.584175 | -1.113277 | 1.378865  |
| 8    | -2.520320 | -1.106095 | 1.691244  |
| 1    | -3.015835 | -1.047104 | 0.857967  |
| 1    | 1.308618  | 2.297598  | 0.253805  |
| 8    | 2.132241  | 2.727861  | 0.560077  |
| 1    | 2.770428  | 1.999663  | 0.503703  |
| 1    | 1.453938  | -1.842701 | 1.014091  |
| 8    | 2.328108  | -2.309081 | 0.988936  |
| 1    | 2.509273  | -2.244210 | 0.044324  |
| 1    | -2.483031 | 0.943640  | 1.497103  |
| 8    | -2.463788 | 1.764636  | 0.978910  |
| 1    | -1.609662 | 1.681559  | 0.492151  |

6.7.5-12

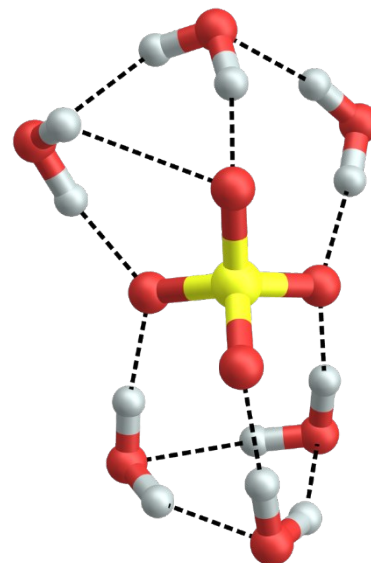

## 6.7.5-13

| atom | x         | y         | z         |
|------|-----------|-----------|-----------|
| 8    | -1.313751 | -1.331961 | -0.846577 |
| 16   | 0.069129  | -0.838461 | -0.534366 |
| 8    | 0.006526  | -0.127935 | 0.807616  |
| 8    | 0.492314  | 0.128726  | -1.571165 |
| 8    | 1.002397  | -1.973428 | -0.438564 |
| 1    | 2.770468  | -1.560271 | 0.061695  |
| 8    | 3.629878  | -1.227759 | 0.392596  |
| 1    | 3.395975  | -0.331524 | 0.684306  |
| 1    | 2.145351  | 1.899466  | 0.572594  |
| 8    | 2.352901  | 1.288169  | 1.300679  |
| 1    | 1.566896  | 0.700031  | 1.270021  |
| 1    | 0.241756  | 2.836186  | -0.410684 |
| 8    | 1.061171  | 2.708832  | -0.917741 |
| 1    | 0.933437  | 1.784969  | -1.242947 |
| 1    | -2.218715 | -1.645632 | 0.771499  |
| 8    | -2.472248 | -1.345443 | 1.669659  |
| 1    | -1.673209 | -0.822847 | 1.851392  |
| 1    | -0.809913 | 1.450702  | 0.812029  |
| 8    | -1.339277 | 2.274557  | 0.694821  |
| 1    | -2.084661 | 1.938749  | 0.171070  |
| 1    | -2.597276 | -0.053932 | -0.874488 |
| 8    | -3.341043 | 0.493475  | -0.526594 |
| 1    | -3.407109 | 0.121619  | 0.365536  |

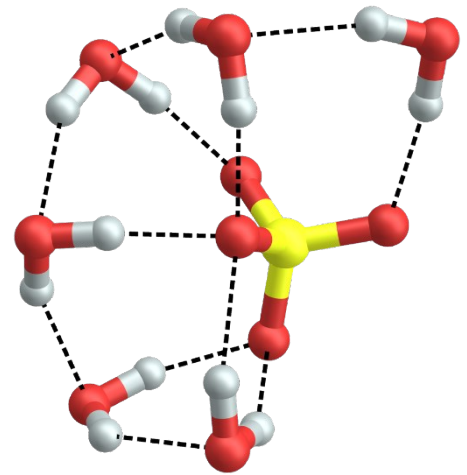

| atom | x         | y         | z         |
|------|-----------|-----------|-----------|
| 8    | 0.677370  | -0.071698 | -1.778847 |
| 16   | -0.461103 | -0.114742 | -0.833332 |
| 8    | -1.731156 | 0.166922  | -1.522473 |
| 8    | -0.238503 | 0.912722  | 0.258948  |
| 8    | -0.521911 | -1.458372 | -0.162794 |
| 1    | 2.271797  | -0.584299 | -1.357419 |
| 8    | 3.129210  | -0.893222 | -0.969704 |
| 1    | 2.824975  | -1.566231 | -0.338213 |
| 1    | -1.464070 | 0.291864  | 1.751804  |
| 8    | -1.948892 | -0.485693 | 2.082050  |
| 1    | -1.589196 | -1.139176 | 1.451376  |
| 1    | -3.560623 | -0.146375 | 0.882653  |
| 8    | -4.057821 | 0.030149  | 0.068320  |
| 1    | -3.325082 | 0.096617  | -0.579980 |
| 1    | 1.363703  | 0.793787  | 0.978585  |
| 8    | 2.304835  | 0.772881  | 1.281670  |
| 1    | 2.763340  | 0.396187  | 0.509836  |
| 1    | 0.878027  | -2.007695 | 0.707497  |
| 8    | 1.706646  | -2.202151 | 1.215655  |
| 1    | 1.908025  | -1.340477 | 1.608497  |
| 1    | 0.431427  | 2.706535  | 0.142927  |
| 8    | 1.066076  | 3.410972  | 0.382215  |
| 1    | 1.788498  | 2.875059  | 0.735411  |

6.7.5-14

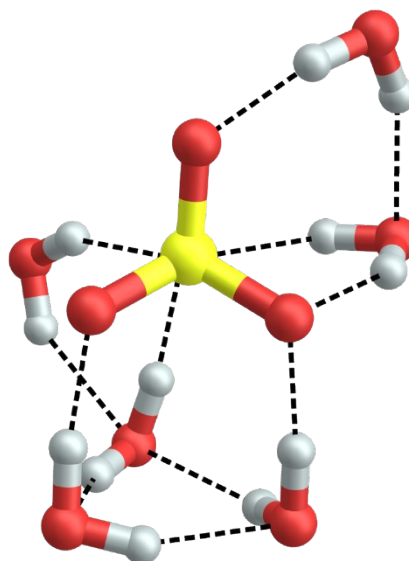

| atom | x         | y         | z         |
|------|-----------|-----------|-----------|
| 8    | -0.285024 | -0.014860 | -1.360675 |
| 16   | 0.697147  | -0.003564 | -0.234134 |
| 8    | 0.485781  | 1.230169  | 0.581262  |
| 8    | 2.084481  | -0.019543 | -0.768128 |
| 8    | 0.474598  | -1.210915 | 0.618708  |
| 1    | -3.058602 | -0.355641 | -1.276252 |
| 8    | -2.743618 | -1.273614 | -1.344970 |
| 1    | -1.777220 | -1.102026 | -1.400288 |
| 1    | -1.074847 | 1.356186  | 1.415209  |
| 8    | -2.002705 | 1.316772  | 1.749200  |
| 1    | -2.160639 | 0.354710  | 1.790141  |
| 1    | 2.120014  | 2.427314  | 0.514698  |
| 8    | 3.024242  | 2.492923  | 0.163278  |
| 1    | 3.033241  | 1.631894  | -0.293273 |
| 1    | -2.550993 | 1.621301  | -0.058723 |
| 8    | -2.596089 | 1.584616  | -1.034050 |
| 1    | -1.710297 | 1.224595  | -1.250869 |
| 1    | -1.137416 | -1.478364 | 1.262699  |
| 8    | -2.099324 | -1.558840 | 1.474263  |
| 1    | -2.490414 | -1.576768 | 0.583147  |
| 1    | 3.001243  | -1.683420 | -0.277188 |
| 8    | 2.978981  | -2.536460 | 0.193818  |
| 1    | 2.080978  | -2.444746 | 0.555197  |

6.8.4-1 (=6.8.4-2) (6-III)

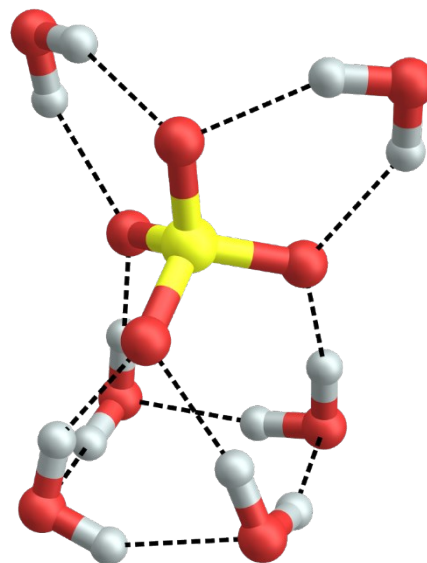

| atom | x         | y         | z         |
|------|-----------|-----------|-----------|
| 8    | -0.034269 | -0.277575 | -1.723980 |
| 16   | -0.710272 | -0.074979 | -0.422114 |
| 8    | -2.155692 | 0.212701  | -0.623164 |
| 8    | -0.068747 | 1.090348  | 0.288162  |
| 8    | -0.558727 | -1.294298 | 0.429786  |
| 1    | 1.641630  | -0.805094 | -1.693561 |
| 8    | 2.591839  | -1.014095 | -1.519474 |
| 1    | 2.547402  | -1.422606 | -0.634655 |
| 1    | 1.128747  | 0.835424  | 1.703469  |
| 8    | 2.028154  | 0.832098  | 2.096812  |
| 1    | 2.530141  | 1.180182  | 1.338970  |
| 1    | -2.609345 | 1.991279  | -0.048569 |
| 8    | -2.368203 | 2.848664  | 0.351216  |
| 1    | -1.437009 | 2.638615  | 0.526115  |
| 1    | 2.167725  | -1.069307 | 1.611017  |
| 8    | 1.999344  | -1.916969 | 1.163264  |
| 1    | 1.056358  | -1.805553 | 0.889661  |
| 1    | 2.754828  | 0.810692  | -0.984135 |
| 8    | 2.571359  | 1.686100  | -0.590106 |
| 1    | 1.601924  | 1.637216  | -0.457144 |
| 1    | -3.263303 | -1.243217 | 0.101263  |
| 8    | -3.305573 | -2.088444 | 0.584402  |
| 1    | -2.350621 | -2.176194 | 0.746051  |

6.8.4-3 (=6.8.4-4)

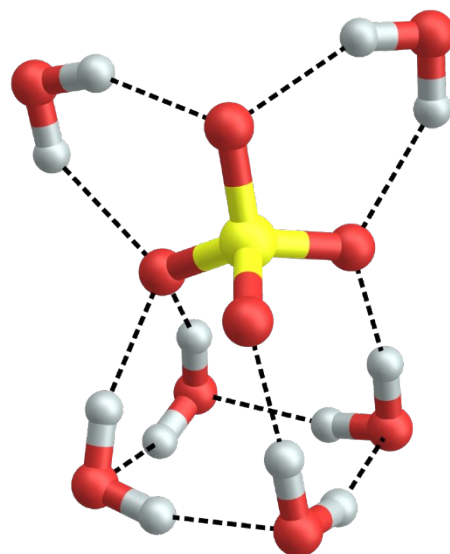

| atom | x         | y         | z         |
|------|-----------|-----------|-----------|
| 8    | 0.157307  | -0.354154 | 1.215535  |
| 16   | 0.369212  | 0.377614  | -0.072398 |
| 8    | 0.065499  | -0.541084 | -1.209528 |
| 8    | 1.788393  | 0.822358  | -0.152110 |
| 8    | -0.534476 | 1.561554  | -0.132935 |
| 1    | -2.249315 | 1.352079  | 0.242876  |
| 8    | -3.178054 | 1.084513  | 0.440425  |
| 1    | -3.046007 | 0.306973  | 1.008762  |
| 1    | 0.540755  | 3.285291  | -0.249349 |
| 8    | 1.446066  | 3.636039  | -0.294328 |
| 1    | 1.906140  | 2.777462  | -0.261480 |
| 1    | -2.971612 | -0.308646 | -1.055244 |
| 8    | -2.623848 | -1.123876 | -1.451900 |
| 1    | -1.651428 | -0.959003 | -1.452498 |
| 1    | 2.393934  | -2.401091 | -0.346543 |
| 8    | 1.979283  | -2.695496 | -1.172554 |
| 1    | 1.288974  | -2.014287 | -1.296721 |
| 1    | -1.400720 | -1.149586 | 1.450683  |
| 8    | -2.314015 | -1.525219 | 1.459639  |
| 1    | -2.466374 | -1.706250 | 0.517680  |
| 1    | 1.905506  | -1.280197 | 1.596811  |
| 8    | 2.841839  | -1.295588 | 1.327815  |
| 1    | 2.818814  | -0.496941 | 0.762920  |

6.8.4-5 (=6.8.4-7)

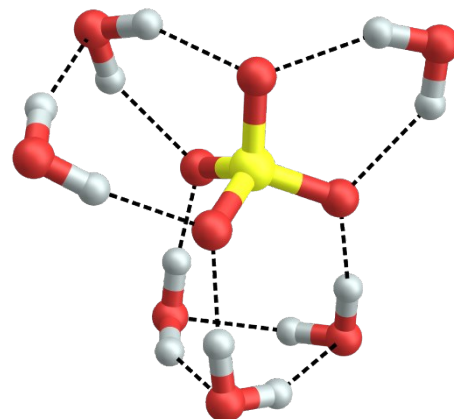

| atom | x         | y         | z         |
|------|-----------|-----------|-----------|
| 8    | -0.071806 | -0.542853 | -1.218522 |
| 16   | -0.360427 | 0.372232  | -0.074258 |
| 8    | -1.772239 | 0.841035  | -0.151563 |
| 8    | 0.561366  | 1.542551  | -0.123325 |
| 8    | -0.161283 | -0.373298 | 1.207488  |
| 1    | -1.858593 | 2.798107  | -0.254211 |
| 8    | -1.384576 | 3.649165  | -0.284273 |
| 1    | -0.485131 | 3.283424  | -0.241023 |
| 1    | 3.156615  | 0.139908  | -0.773453 |
| 8    | 3.244543  | 0.987139  | -0.304378 |
| 1    | 2.305198  | 1.283603  | -0.250920 |
| 1    | 2.869429  | -0.187496 | 1.339050  |
| 8    | 2.460656  | -0.934425 | 1.806087  |
| 1    | 1.497666  | -0.759651 | 1.676122  |
| 1    | 1.517330  | -1.353039 | -1.188852 |
| 8    | 2.423934  | -1.715450 | -1.047166 |
| 1    | 2.472403  | -1.769111 | -0.078820 |
| 1    | -1.360007 | -1.976251 | -1.313523 |
| 8    | -2.071690 | -2.634307 | -1.188386 |
| 1    | -2.467300 | -2.335083 | -0.354740 |
| 1    | -2.824587 | -0.442797 | 0.772876  |
| 8    | -2.869408 | -1.242314 | 1.335823  |
| 1    | -1.932182 | -1.255272 | 1.601349  |

6.8.4-6 (=6.8.4-8)

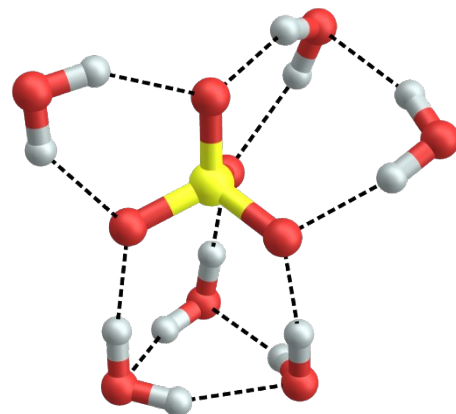

## 6.8.4-9

| atom | x         | y         | z         |
|------|-----------|-----------|-----------|
| 8    | -1.478646 | -1.281913 | 0.339900  |
| 16   | -0.660480 | -0.073136 | 0.020905  |
| 8    | -1.542176 | 1.097705  | -0.195728 |
| 8    | 0.149189  | -0.347462 | -1.207477 |
| 8    | 0.272693  | 0.196719  | 1.162468  |
| 1    | -0.449457 | -2.768573 | -0.196806 |
| 8    | 0.305528  | -3.131220 | -0.706456 |
| 1    | 0.493985  | -2.326236 | -1.222344 |
| 1    | -3.502643 | 0.573750  | 0.010193  |
| 8    | -4.085479 | -0.180442 | 0.200840  |
| 1    | -3.381612 | -0.844772 | 0.319022  |
| 1    | 2.918122  | -0.680620 | -0.297292 |
| 8    | 2.872807  | -0.064801 | -1.048676 |
| 1    | 1.902125  | -0.064166 | -1.221089 |
| 1    | 1.522970  | -1.110928 | 1.315684  |
| 8    | 2.169231  | -1.842884 | 1.187017  |
| 1    | 1.663922  | -2.451302 | 0.620910  |
| 1    | 2.593040  | 1.601831  | 0.036012  |
| 8    | 2.154583  | 2.160601  | 0.700223  |
| 1    | 1.433679  | 1.556369  | 0.988874  |
| 1    | 0.710220  | 3.269840  | -0.132002 |
| 8    | -0.147815 | 3.597004  | -0.449573 |
| 1    | -0.696009 | 2.788516  | -0.415957 |

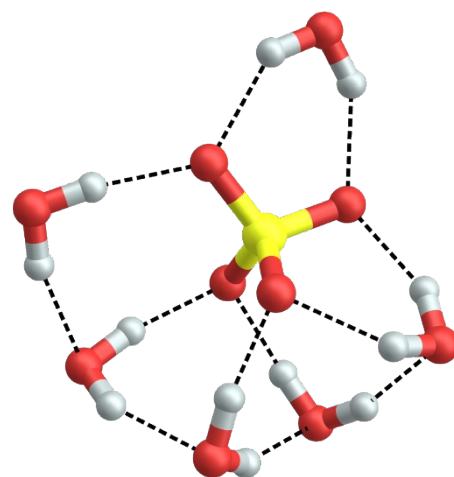



| <b>atom</b> | <b>x</b>  | <b>y</b>  | <b>z</b>  |
|-------------|-----------|-----------|-----------|
| 8           | -0.133506 | -0.486597 | 1.200312  |
| 16          | -0.393527 | 0.357250  | -0.010701 |
| 8           | 0.487740  | 1.559646  | 0.022552  |
| 8           | -1.815317 | 0.783081  | -0.029466 |
| 8           | -0.092228 | -0.459853 | -1.227090 |
| 1           | -0.827465 | -2.228672 | 0.722732  |
| 8           | -1.131162 | -2.843782 | 0.025770  |
| 1           | -0.842437 | -2.320768 | -0.742200 |
| 1           | -3.143934 | -0.543446 | -0.023256 |
| 8           | -3.683000 | -1.360625 | -0.016266 |
| 1           | -2.986582 | -2.036533 | 0.006258  |
| 1           | -0.607096 | 3.255415  | 0.027898  |
| 8           | -1.511185 | 3.613193  | 0.019067  |
| 1           | -1.976079 | 2.757673  | -0.000679 |
| 1           | 1.549210  | -1.108291 | -1.359685 |
| 8           | 2.477209  | -1.439658 | -1.293854 |
| 1           | 2.567954  | -1.590631 | -0.338826 |
| 1           | 1.582513  | -0.800723 | 1.556864  |
| 8           | 2.557732  | -0.934405 | 1.625203  |
| 1           | 2.907677  | -0.124343 | 1.219690  |
| 1           | 3.131599  | 0.414940  | -0.856480 |
| 8           | 3.182841  | 1.215424  | -0.307256 |
| 1           | 2.228098  | 1.437971  | -0.192869 |

6.8.4-10

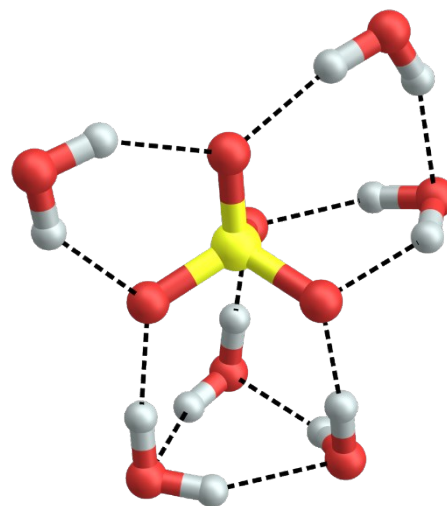

| atom | x         | y         | z         |
|------|-----------|-----------|-----------|
| 8    | -0.251992 | -0.637636 | 0.833802  |
| 16   | 0.093853  | -0.671979 | -0.637468 |
| 8    | -0.108437 | 0.702747  | -1.199131 |
| 8    | -0.815093 | -1.620876 | -1.319652 |
| 8    | 1.510402  | -1.077800 | -0.795982 |
| 1    | 2.005009  | -2.275929 | 0.827295  |
| 8    | 1.701329  | -2.541199 | 1.710686  |
| 1    | 0.911341  | -1.973515 | 1.747145  |
| 1    | -1.607556 | 1.949069  | 1.237388  |
| 8    | -0.917309 | 1.809934  | 1.908046  |
| 1    | -0.568954 | 0.932066  | 1.628909  |
| 1    | 0.757499  | 2.094548  | -0.525511 |
| 8    | 1.125817  | 2.807875  | 0.044830  |
| 1    | 0.591083  | 2.679125  | 0.845653  |
| 1    | -2.430884 | -1.520657 | -0.446899 |
| 8    | -2.999958 | -1.262851 | 0.313159  |
| 1    | -2.281213 | -1.053382 | 0.933280  |
| 1    | -2.982903 | 0.674231  | -0.214382 |
| 8    | -2.653801 | 1.555746  | -0.461571 |
| 1    | -1.770683 | 1.336673  | -0.837546 |
| 1    | 2.843223  | 0.251329  | -0.507173 |
| 8    | 3.437088  | 1.007757  | -0.333113 |
| 1    | 2.808012  | 1.708546  | -0.097256 |

6.8.4-11

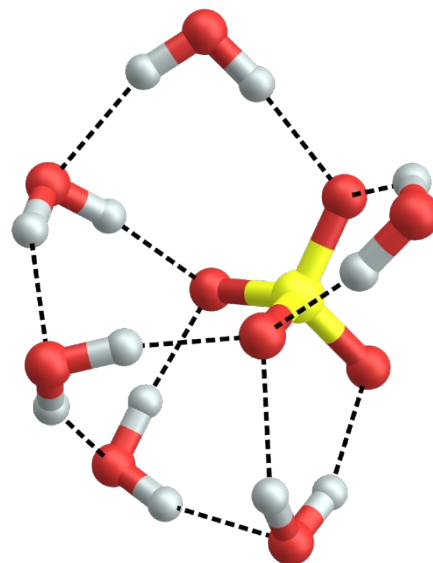

## 6.8.4-12

| atom | x         | y         | z         |
|------|-----------|-----------|-----------|
| 8    | -1.346792 | 0.668682  | -1.529966 |
| 16   | -0.387133 | -0.074580 | -0.688403 |
| 8    | -0.978485 | -1.384194 | -0.264299 |
| 8    | -0.083817 | 0.728599  | 0.550774  |
| 8    | 0.882228  | -0.337472 | -1.423113 |
| 1    | 2.468809  | 0.239503  | -0.822246 |
| 8    | 3.286206  | 0.434440  | -0.309627 |
| 1    | 3.047637  | 0.061382  | 0.557786  |
| 1    | 1.025801  | 2.287507  | 0.433849  |
| 8    | 1.810904  | 2.868302  | 0.414538  |
| 1    | 2.495438  | 2.231778  | 0.151616  |
| 1    | 1.735026  | -1.581079 | 1.447245  |
| 8    | 1.876631  | -0.750485 | 1.933789  |
| 1    | 1.152063  | -0.183397 | 1.587530  |
| 1    | -3.510107 | -0.067331 | 0.872136  |
| 8    | -3.551894 | -1.036028 | 0.912930  |
| 1    | -2.690286 | -1.277822 | 0.515726  |
| 1    | 0.351887  | -2.538409 | 0.005174  |
| 8    | 1.280926  | -2.871407 | -0.011445 |
| 1    | 1.634451  | -2.237076 | -0.653469 |
| 1    | -2.501743 | 1.516454  | -0.372246 |
| 8    | -2.805674 | 1.814792  | 0.513629  |
| 1    | -1.976701 | 1.659942  | 0.993663  |

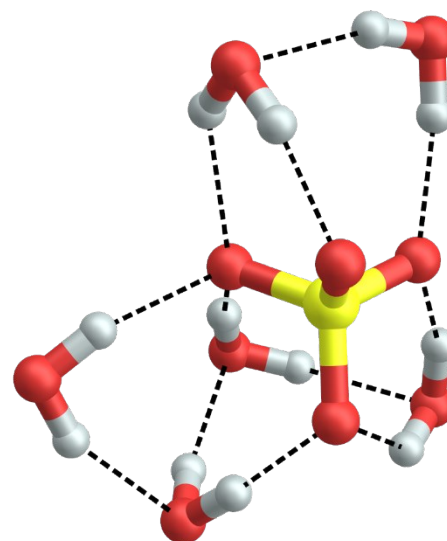

| atom | x         | y         | z         |
|------|-----------|-----------|-----------|
| 8    | 0.173708  | 0.164900  | -1.191936 |
| 16   | -0.777109 | -0.096379 | -0.064474 |
| 8    | -1.321908 | -1.479723 | -0.178722 |
| 8    | -1.883103 | 0.894810  | -0.104031 |
| 8    | -0.022867 | 0.032084  | 1.225497  |
| 1    | -1.315911 | 2.665716  | 0.122126  |
| 8    | -0.862997 | 3.526330  | 0.243577  |
| 1    | 0.062640  | 3.249762  | 0.307816  |
| 1    | -0.046570 | -2.620397 | 0.710871  |
| 8    | 0.746521  | -2.668718 | 1.280863  |
| 1    | 0.738366  | -1.736079 | 1.571623  |
| 1    | 1.534906  | -1.034570 | -1.200923 |
| 8    | 2.261171  | -1.677271 | -1.028268 |
| 1    | 1.919870  | -2.151907 | -0.250560 |
| 1    | 1.254127  | 1.366481  | 0.928215  |
| 8    | 1.732582  | 1.946717  | 0.296542  |
| 1    | 1.364569  | 1.555026  | -0.520394 |
| 1    | -3.288266 | -1.438890 | -0.316426 |
| 8    | -4.099580 | -0.900395 | -0.348417 |
| 1    | -3.665598 | -0.032937 | -0.274940 |
| 1    | 3.448742  | 0.963623  | 0.080913  |
| 8    | 4.130971  | 0.311509  | -0.154066 |
| 1    | 3.590872  | -0.445713 | -0.455052 |

6.8.4-13

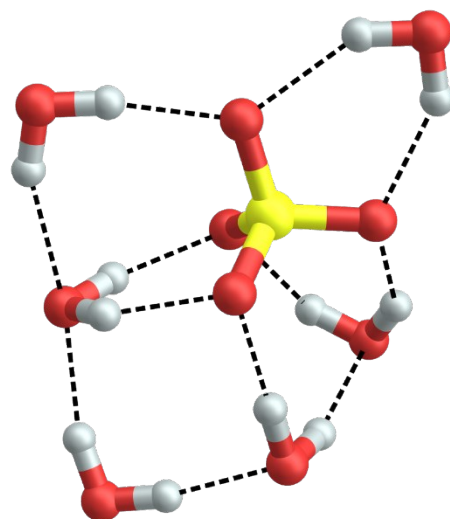

## 6.8.4-14

| atom | x         | y         | z         |
|------|-----------|-----------|-----------|
| 8    | -0.427239 | -1.121759 | -0.875198 |
| 16   | -0.361666 | 0.348776  | -0.625210 |
| 8    | -0.290642 | 0.587328  | 0.862978  |
| 8    | -1.566418 | 1.011246  | -1.165184 |
| 8    | 0.870466  | 0.908686  | -1.256130 |
| 1    | 0.801625  | -2.219266 | -0.230433 |
| 8    | 1.549955  | -2.697332 | 0.199364  |
| 1    | 1.672528  | -2.174156 | 1.009450  |
| 1    | -3.229195 | -1.207950 | 0.479631  |
| 8    | -2.993812 | -2.062214 | 0.084249  |
| 1    | -2.116475 | -1.863674 | -0.297439 |
| 1    | 2.603756  | -0.249515 | 1.266017  |
| 8    | 2.001316  | -0.448968 | 2.000340  |
| 1    | 1.148819  | -0.072794 | 1.675788  |
| 1    | 1.251446  | 2.585544  | -0.306590 |
| 8    | 1.182672  | 3.146435  | 0.487913  |
| 1    | 0.626295  | 2.557934  | 1.019582  |
| 1    | 2.420611  | 0.062397  | -0.983117 |
| 8    | 3.204629  | -0.479545 | -0.733781 |
| 1    | 2.809814  | -1.358366 | -0.602609 |
| 1    | -2.860014 | 0.954338  | 0.152960  |
| 8    | -3.163314 | 0.750526  | 1.064767  |
| 1    | -2.283446 | 0.649889  | 1.465582  |

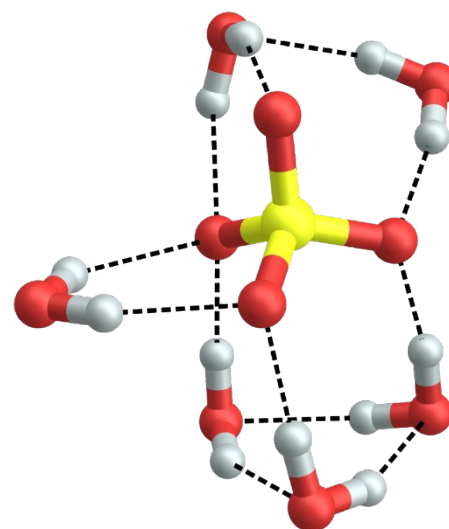

| atom | x         | y         | z         |
|------|-----------|-----------|-----------|
| 8    | -0.913243 | -0.177130 | -1.412458 |
| 16   | 0.389370  | -0.131441 | -0.685003 |
| 8    | 0.469290  | -1.266239 | 0.281238  |
| 8    | 0.457097  | 1.163766  | 0.085695  |
| 8    | 1.520159  | -0.198461 | -1.634314 |
| 1    | -0.814399 | 1.340107  | 1.314725  |
| 8    | -1.683391 | 1.486749  | 1.760868  |
| 1    | -2.231757 | 1.704548  | 0.993981  |
| 1    | -0.880212 | -1.456060 | 1.443544  |
| 8    | -1.677514 | -1.415416 | 2.020703  |
| 1    | -1.830842 | -0.455824 | 2.071512  |
| 1    | 2.947668  | -0.938730 | -0.709349 |
| 8    | 3.337530  | -1.369346 | 0.082402  |
| 1    | 2.499417  | -1.607932 | 0.514485  |
| 1    | -2.337962 | -1.327480 | -0.945272 |
| 8    | -3.056135 | -1.833658 | -0.518128 |
| 1    | -2.764861 | -1.815049 | 0.409493  |
| 1    | 3.363958  | 0.490530  | 0.945141  |
| 8    | 3.093782  | 1.378958  | 1.226704  |
| 1    | 2.184021  | 1.425055  | 0.871216  |
| 1    | -1.793793 | 1.392118  | -1.355900 |
| 8    | -1.979673 | 2.330799  | -1.122947 |
| 1    | -1.114380 | 2.551589  | -0.751627 |

6.8.4-15

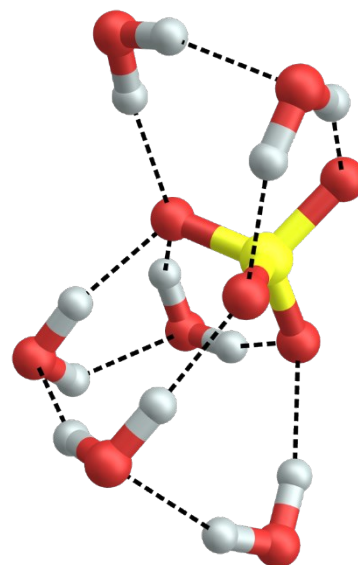

## 6.8.4-16

| atom | x         | y         | z         |
|------|-----------|-----------|-----------|
| 8    | 0.384030  | 1.385578  | -0.472671 |
| 16   | -0.255795 | 0.328743  | 0.368953  |
| 8    | -1.654434 | 0.740690  | 0.694130  |
| 8    | 0.520562  | 0.127545  | 1.611285  |
| 8    | -0.301201 | -0.950345 | -0.416736 |
| 1    | 3.279557  | 0.606403  | -0.033400 |
| 8    | 3.086296  | 1.117785  | -0.836731 |
| 1    | 2.122739  | 1.307633  | -0.731869 |
| 1    | 2.524507  | -0.706050 | -1.564061 |
| 8    | 2.161119  | -1.604776 | -1.501204 |
| 1    | 1.245930  | -1.439142 | -1.174770 |
| 1    | -1.291339 | -2.444273 | 0.215262  |
| 8    | -2.056543 | -3.042859 | 0.333874  |
| 1    | -2.780447 | -2.433224 | 0.130714  |
| 1    | -1.917296 | 2.701365  | 0.256231  |
| 8    | -1.517113 | 3.481464  | -0.163837 |
| 1    | -0.685366 | 3.054770  | -0.436856 |
| 1    | -2.653420 | -0.965192 | -1.429853 |
| 8    | -3.370348 | -0.662865 | -0.860617 |
| 1    | -2.853391 | -0.093727 | -0.235080 |
| 1    | 2.127579  | -0.573335 | 1.480660  |
| 8    | 3.015809  | -0.945972 | 1.259032  |
| 1    | 2.828244  | -1.445064 | 0.447568  |

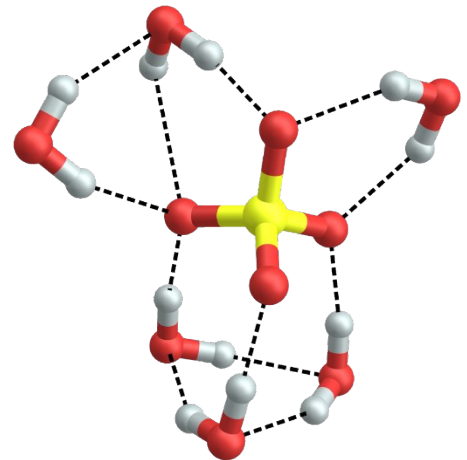

| atom | x         | y         | z         |
|------|-----------|-----------|-----------|
| 8    | 1.702627  | -1.470716 | 0.718237  |
| 16   | 0.513754  | -0.743859 | 0.221981  |
| 8    | 0.421441  | 0.600697  | 0.911042  |
| 8    | -0.728604 | -1.510075 | 0.502449  |
| 8    | 0.646803  | -0.501051 | -1.248904 |
| 1    | -2.951163 | 1.142453  | 0.471064  |
| 8    | -3.252506 | 1.412231  | -0.419371 |
| 1    | -2.410978 | 1.596492  | -0.884594 |
| 1    | -0.286161 | 1.967875  | -0.560695 |
| 8    | -0.648051 | 1.887112  | -1.457554 |
| 1    | -0.281927 | 0.994290  | -1.655950 |
| 1    | -2.258706 | -1.598337 | -0.581555 |
| 8    | -3.152843 | -1.508023 | -0.967374 |
| 1    | -3.311592 | -0.552383 | -0.904521 |
| 1    | 2.686308  | -0.263029 | -1.536641 |
| 8    | 3.521522  | -0.428231 | -1.066060 |
| 1    | 3.135907  | -0.923614 | -0.310169 |
| 1    | -2.008346 | -0.454017 | 1.656701  |
| 8    | -2.086331 | 0.448445  | 2.012769  |
| 1    | -1.174322 | 0.738964  | 1.788644  |
| 1    | 3.341739  | 1.240964  | 0.125315  |
| 8    | 2.977166  | 1.882889  | 0.754943  |
| 1    | 2.089381  | 1.505858  | 0.919296  |

6.8.4-17

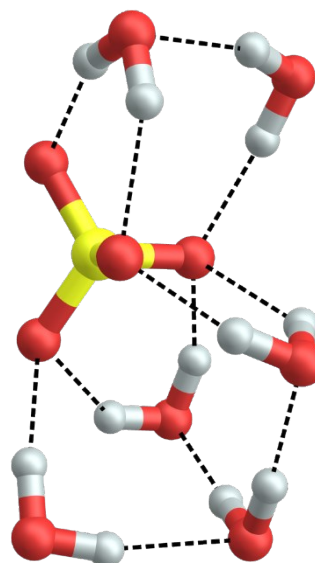



| atom | x         | y         | z         |
|------|-----------|-----------|-----------|
| 8    | 0.439849  | -0.214467 | 0.853406  |
| 16   | 0.046202  | -0.643403 | -0.540447 |
| 8    | -0.097911 | 0.574782  | -1.391770 |
| 8    | -1.269677 | -1.353881 | -0.469704 |
| 8    | 1.082848  | -1.541189 | -1.091268 |
| 1    | 1.221505  | 1.571819  | 0.717261  |
| 8    | 1.511869  | 2.286902  | 0.119997  |
| 1    | 1.054720  | 1.957487  | -0.677928 |
| 1    | 2.591946  | -1.535117 | -0.045655 |
| 8    | 3.067401  | -1.308979 | 0.783649  |
| 1    | 2.308080  | -0.902200 | 1.236241  |
| 1    | -1.167791 | -0.298422 | 2.049538  |
| 8    | -2.056589 | -0.693529 | 2.096093  |
| 1    | -2.025534 | -1.135852 | 1.222100  |
| 1    | -3.399259 | 0.586949  | 1.505497  |
| 8    | -4.050976 | 1.124460  | 1.018897  |
| 1    | -3.716206 | 1.079872  | 0.104255  |
| 1    | 3.962725  | 0.369433  | 0.414349  |
| 8    | 4.229761  | 1.298667  | 0.284952  |
| 1    | 3.371895  | 1.740566  | 0.143722  |
| 1    | -2.002464 | 0.981149  | -1.654799 |
| 8    | -2.897078 | 0.596683  | -1.593387 |
| 1    | -2.614835 | -0.276839 | -1.254347 |

6.8.4-18

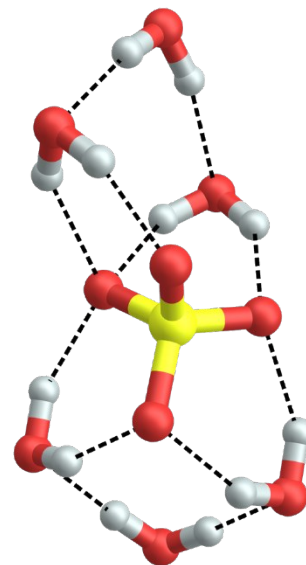

## 6.8.4-19

| atom | x         | y         | z         |
|------|-----------|-----------|-----------|
| 8    | -0.448633 | 1.205501  | -0.663271 |
| 16   | -0.768418 | -0.016032 | 0.132669  |
| 8    | -2.130130 | 0.116133  | 0.715800  |
| 8    | 0.240251  | -0.176442 | 1.225650  |
| 8    | -0.715777 | -1.219318 | -0.754268 |
| 1    | 0.763139  | -2.194451 | -0.409299 |
| 8    | 1.549140  | -2.419398 | 0.139458  |
| 1    | 1.343729  | -1.808665 | 0.869858  |
| 1    | 1.182038  | 1.563006  | -1.087767 |
| 8    | 2.141788  | 1.795813  | -1.168642 |
| 1    | 2.403515  | 1.854337  | -0.236743 |
| 1    | 3.057155  | 0.081058  | -1.141405 |
| 8    | 3.563952  | -0.686674 | -0.814411 |
| 1    | 2.880011  | -1.347197 | -0.575321 |
| 1    | 1.802109  | 0.612907  | 1.505701  |
| 8    | 2.739825  | 0.911011  | 1.574507  |
| 1    | 3.203583  | 0.303231  | 0.977211  |
| 1    | -2.450596 | -2.213786 | -0.697846 |
| 8    | -3.352838 | -2.226927 | -0.333199 |
| 1    | -3.278636 | -1.402330 | 0.180000  |
| 1    | -1.935759 | 2.603464  | -0.488276 |
| 8    | -2.811333 | 2.742435  | -0.090801 |
| 1    | -2.885569 | 1.867857  | 0.334590  |

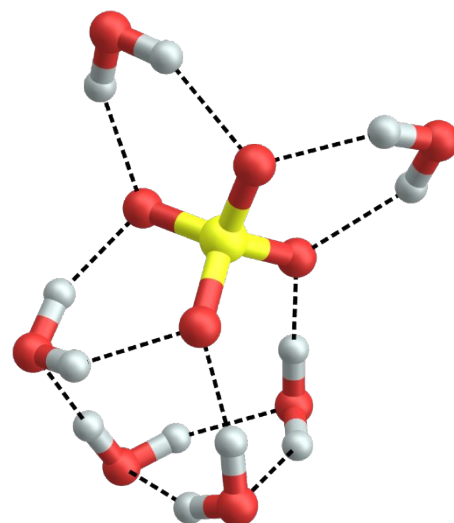

| atom | x         | y         | z         |
|------|-----------|-----------|-----------|
| 8    | 1.205859  | 0.723560  | -0.154359 |
| 16   | 0.000000  | 0.000000  | 0.342619  |
| 8    | -1.229551 | 0.682525  | -0.154359 |
| 8    | 0.000000  | 0.000000  | 1.837909  |
| 8    | 0.023692  | -1.406084 | -0.154359 |
| 1    | -1.586342 | 0.569551  | -1.886858 |
| 8    | -1.641500 | 0.454209  | -2.865180 |
| 1    | -1.181743 | -0.391410 | -2.996474 |
| 1    | -0.005879 | -1.902620 | 2.546405  |
| 8    | 0.000000  | -2.843413 | 2.303318  |
| 1    | 0.011476  | -2.717153 | 1.338308  |
| 1    | 0.299925  | -1.658588 | -1.886858 |
| 8    | 0.427394  | -1.648685 | -2.865180 |
| 1    | 0.929843  | -0.827715 | -2.996474 |
| 1    | 1.286417  | 1.089037  | -1.886858 |
| 8    | 1.214106  | 1.194476  | -2.865180 |
| 1    | 0.251900  | 1.219125  | -2.996474 |
| 1    | -2.358861 | 1.348638  | 1.338308  |
| 8    | -2.462468 | 1.421707  | 2.303318  |
| 1    | -1.644778 | 0.956401  | 2.546405  |
| 1    | 2.347385  | 1.368515  | 1.338308  |
| 8    | 2.462468  | 1.421707  | 2.303318  |
| 1    | 1.650657  | 0.946219  | 2.546405  |

6.9.3-1 (6-I)

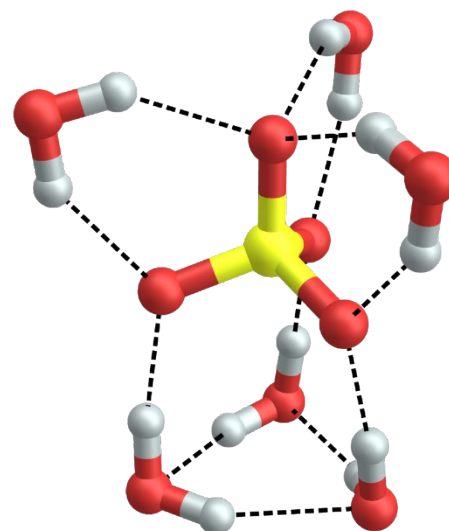

| atom | x         | y         | z         |
|------|-----------|-----------|-----------|
| 8    | -2.220323 | 0.197729  | -0.186878 |
| 16   | -0.804382 | -0.192612 | -0.412079 |
| 8    | 0.036528  | 1.046845  | -0.554661 |
| 8    | -0.675845 | -1.023383 | -1.631155 |
| 8    | -0.297796 | -0.970447 | 0.772659  |
| 1    | -1.195505 | 2.663882  | -0.945567 |
| 8    | -2.129410 | 2.929039  | -0.936188 |
| 1    | -2.496660 | 2.067632  | -0.664172 |
| 1    | 0.822632  | 1.495491  | 1.286147  |
| 8    | 1.084316  | 1.045954  | 2.107588  |
| 1    | 0.659199  | 0.185420  | 1.914027  |
| 1    | 0.738588  | -2.080085 | -1.433154 |
| 8    | 1.519726  | -2.476772 | -0.978236 |
| 1    | 1.269976  | -2.248281 | -0.069889 |
| 1    | 2.957999  | 0.902567  | 1.672142  |
| 8    | 3.821295  | 0.846181  | 1.222156  |
| 1    | 3.550321  | 0.617630  | 0.312282  |
| 1    | 2.442322  | -0.746142 | -1.270243 |
| 8    | 2.631312  | 0.207725  | -1.313084 |
| 1    | 1.748844  | 0.594681  | -1.123464 |
| 1    | -1.899299 | -1.624944 | 1.862167  |
| 8    | -2.860635 | -1.535278 | 1.972087  |
| 1    | -3.001646 | -0.886810 | 1.258682  |

6.9.3-2

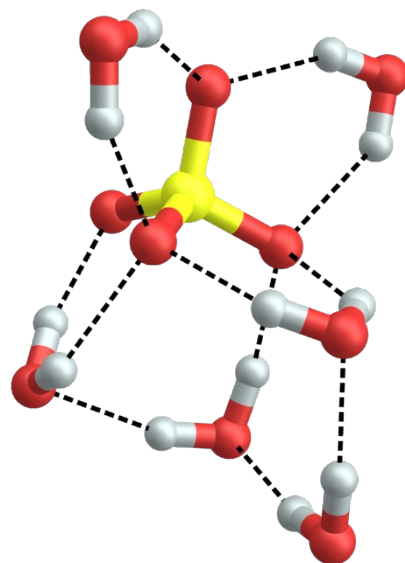

## 6.9.3-3

| atom | x         | y         | z         |
|------|-----------|-----------|-----------|
| 8    | 1.216420  | -1.767009 | 0.008507  |
| 16   | 0.000000  | -0.924726 | 0.000001  |
| 8    | -1.216420 | -1.767008 | -0.008502 |
| 8    | 0.005607  | -0.040476 | -1.216897 |
| 8    | -0.005607 | -0.040471 | 1.216895  |
| 1    | 3.004947  | 0.512711  | 1.200264  |
| 8    | 2.442865  | 1.158486  | 1.658370  |
| 1    | 1.548172  | 0.747973  | 1.589909  |
| 1    | 1.321748  | 1.152155  | -1.301388 |
| 8    | 2.100174  | 1.754292  | -1.223066 |
| 1    | 2.170062  | 1.871656  | -0.261692 |
| 1    | -1.321747 | 1.152161  | 1.301382  |
| 8    | -2.100173 | 1.754298  | 1.223058  |
| 1    | -2.170062 | 1.871657  | 0.261684  |
| 1    | -3.004948 | 0.512704  | -1.200262 |
| 8    | -2.442867 | 1.158477  | -1.658372 |
| 1    | -1.548174 | 0.747965  | -1.589911 |
| 1    | 2.802072  | -1.107939 | -0.274348 |
| 8    | 3.639380  | -0.599093 | -0.408266 |
| 1    | 3.320580  | 0.171633  | -0.907402 |
| 1    | -2.802071 | -1.107937 | 0.274355  |
| 8    | -3.639379 | -0.599091 | 0.408274  |
| 1    | -3.320577 | 0.171637  | 0.907405  |

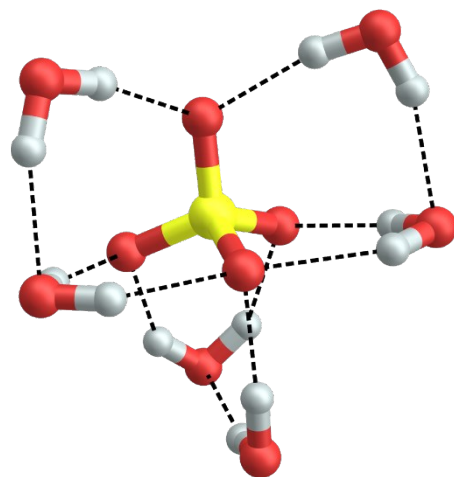

| atom | x         | y         | z         |
|------|-----------|-----------|-----------|
| 8    | 0.862502  | 0.862502  | 0.862502  |
| 16   | 0.000000  | 0.000000  | 0.000000  |
| 8    | -0.862502 | -0.862502 | 0.862502  |
| 8    | 0.862502  | -0.862502 | -0.862502 |
| 8    | -0.862502 | 0.862502  | -0.862502 |
| 1    | -0.515434 | 2.823248  | -0.515434 |
| 8    | 0.000000  | 3.465619  | 0.000000  |
| 1    | 0.515434  | 2.823248  | 0.515434  |
| 1    | 2.823248  | -0.515434 | -0.515434 |
| 8    | 3.465619  | 0.000000  | 0.000000  |
| 1    | 2.823248  | 0.515434  | 0.515434  |
| 1    | 0.515434  | -2.823248 | -0.515434 |
| 8    | 0.000000  | -3.465619 | 0.000000  |
| 1    | -0.515434 | -2.823248 | 0.515434  |
| 1    | -2.823248 | -0.515434 | 0.515434  |
| 8    | -3.465619 | 0.000000  | 0.000000  |
| 1    | -2.823248 | 0.515434  | -0.515434 |
| 1    | 0.515434  | 0.515434  | 2.823248  |
| 8    | 0.000000  | 0.000000  | 3.465619  |
| 1    | -0.515434 | -0.515434 | 2.823248  |
| 1    | 0.515434  | -0.515434 | -2.823248 |
| 8    | 0.000000  | 0.000000  | -3.465619 |
| 1    | -0.515434 | 0.515434  | -2.823248 |

6.12.0-1 (6-II)

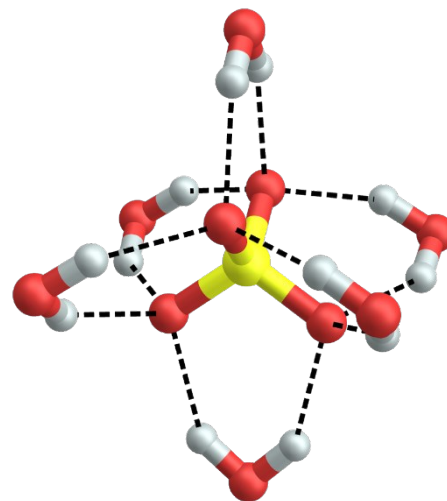

Supplement: d0cp04386a5.pdf [file d0cp04386a5.pdf]
