# Supplementary material for: Cryogenic ion trap vibrational spectroscopy of the microhydrated sulfate dianions SO42−(H2O)3−8
Source: Royal Society of Chemistry journal article supplement (doi:10.1039/d0cp04386a), 2020-01-01
Supplement: d0cp04386a1.pdf [file d0cp04386a1.pdf]

## Supporting information

# Gas Phase Vibrational Spectroscopy of Microhydrated Sulfate Dianions $\text{SO}_4^{2-}(\text{H}_2\text{O})_{3-8}$

Harald Knorke<sup>a</sup>, Huiyan Li<sup>b,c</sup>, Jonas Warneke<sup>a</sup>, Zhi-Feng Liu<sup>b,c</sup> and Knut R. Asmis<sup>a</sup>

<sup>a</sup> *Wilhelm-Ostwald-Institut für Physikalische und Theoretische Chemie, Universität Leipzig, Linnéstr. 2, 04103 Leipzig, Germany. Email: knut.asmis@uni-leipzig.de*

<sup>b</sup> *Department of Chemistry and Centre for Scientific Modelling and Computation, Chinese University of Hong Kong, Hong Kong, China. Email: zfliu@cuhk.edu.hk*

<sup>c</sup> *Shenzhen Research Institute, Chinese University of Hong Kong, No. 10, 2nd Yuexing Road, Shenzhen, China*

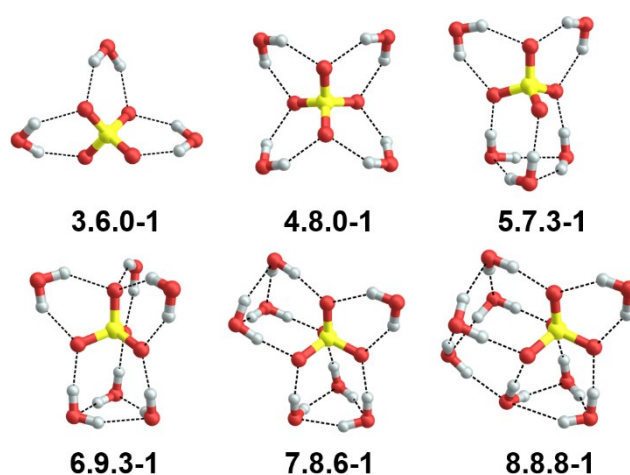

Table of Content Figure

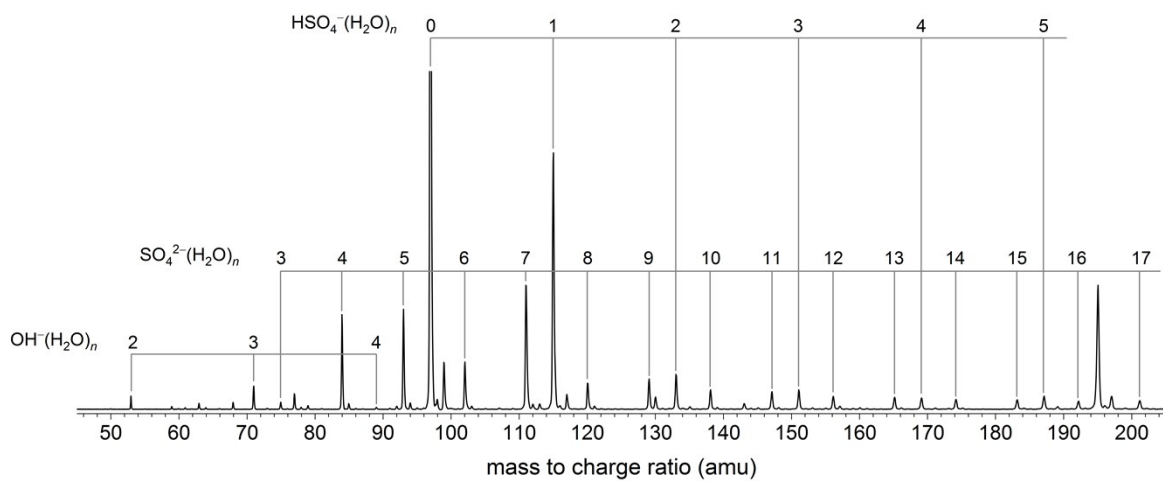

**Figure S1:** Quadrupole mass spectrum of a 20 mMol sulphuric acid in 50:50 water/acetonitrile solution.

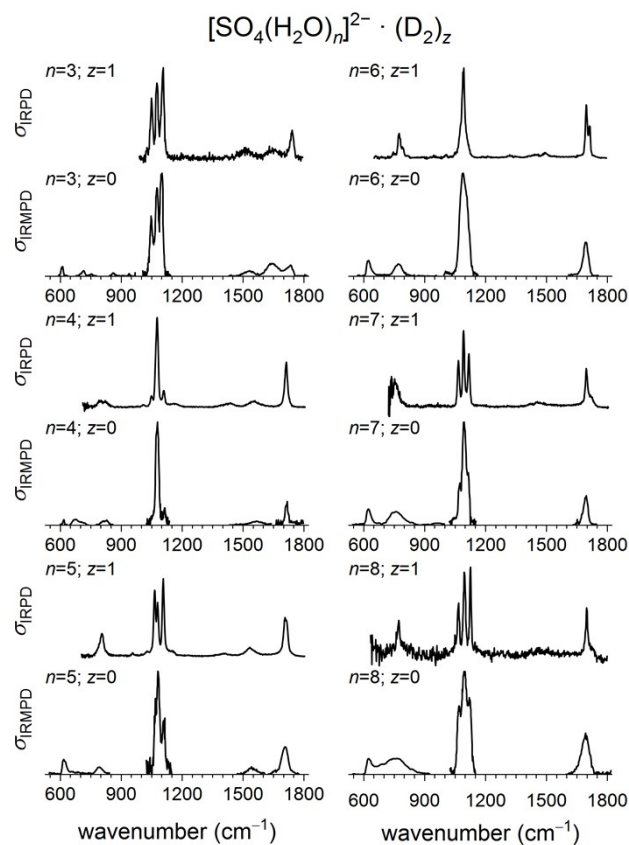

**Figure S2:** Comparison of the IRPD spectra of  $\text{D}_2$ -tagged  $\text{SO}_4^{2-}(\text{H}_2\text{O})_n$  ( $z = 1$ , present study) to IRMPD spectra of bare  $\text{SO}_4^{2-}(\text{H}_2\text{O})_n$  dianions ( $z = 0$ , from Ref.)<sup>1</sup> for  $n = 3$  to 8 in the mid-IR spectral region.

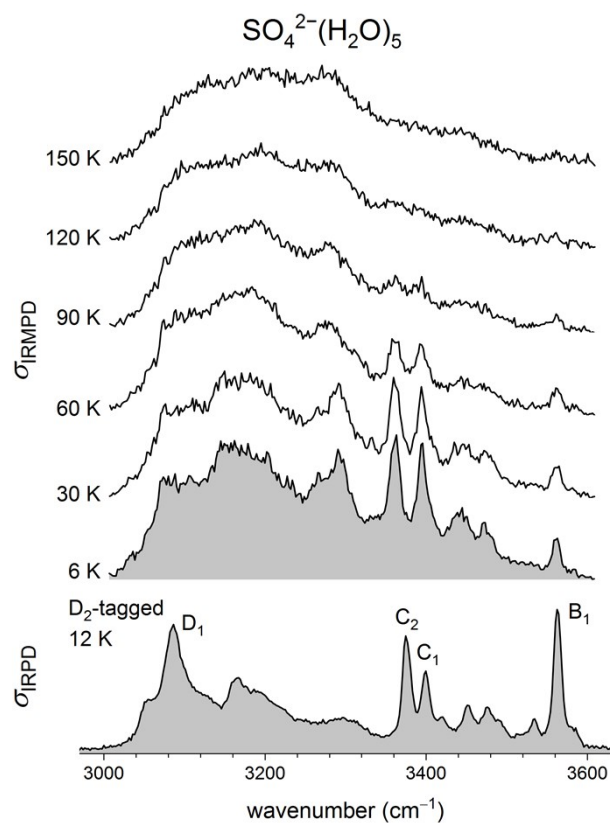

**Figure S3:** IRMPD spectra of  $\text{SO}_4^{2-}(\text{H}_2\text{O})_5$  for trap temperatures from 6 to 150 K. For comparison the IRPD  $\text{D}_2$ -tagged spectrum of  $\text{SO}_4^{2-}(\text{H}_2\text{O})_5$  is shown beneath.

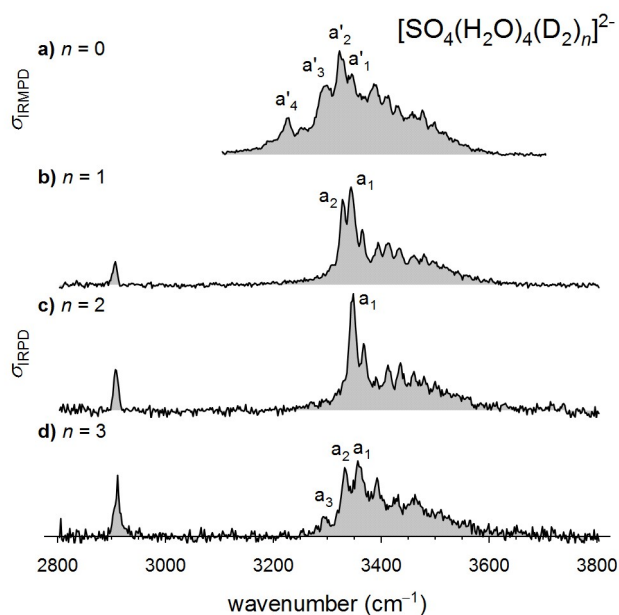

**Figure S4:** a) IRMPD spectra compared with b)-d) IRPD spectra of  $\text{SO}_4^{2-}(\text{H}_2\text{O})_4$  with different numbers of tagging molecules.

VPT2 calculations indicate that everything above  $a_1$  are combination bands of OH stretching vibrations with low-energy vibrations of water molecules. Quantum chemical calculations with  $\text{D}_2$  at different positions of  $\text{SO}_4^{2-}(\text{H}_2\text{O})_4$ , prefer with about 2 kJ/mol, the oxygen of sulfate. We suspect that the second  $\text{D}_2$  molecule attaches to the opposite oxygen atom of the sulfate, leading to a higher molecule symmetry, explaining that  $a_2$  is no longer present. The situation for the third  $\text{D}_2$  molecule is probably different because the splitting between  $a_1$  and  $a_2$  is greater and a new peak  $a_3$  is observed, therefore we assume that the third  $\text{D}_2$  molecule attaches to one of the four oxygen of an  $\text{H}_2\text{O}$ . For the multiphoton spectrum we assume to have a second isomer.

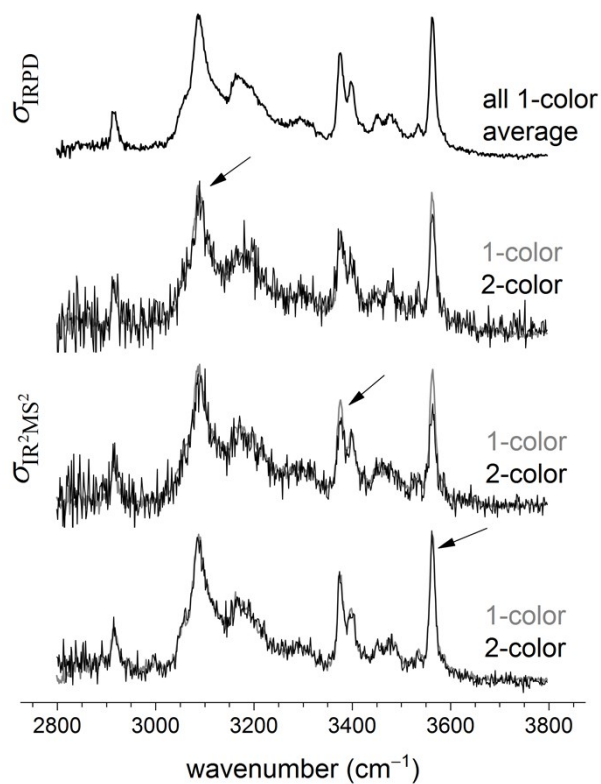

**Figure S5:** Isomer-selective IRPD spectra (IR<sup>2</sup>MS<sup>2</sup>) of D<sub>2</sub>-tagged SO<sub>4</sub><sup>2-</sup>(H<sub>2</sub>O)<sub>5</sub> probed on three distinct absorptions indicating by an arrow. The corresponding IRPD spectrum is highlighted in grey.

**Table S1:** Experimentally determined values (in  $\text{cm}^{-1}$ ) of the antisymmetric SO stretch vibrations ( $\nu_{1-3}$ ), the mean of the frequencies ( $\bar{x}$ ), the spectral mean ( $\bar{x}_s$ ), the width ( $\Delta x$ ), and the spectral width ( $\Delta x_s$ ) for  $[\text{SO}_4(\text{H}_2\text{O})_n]^{2-}$ .

| $n$ | $\nu_1$     | $\nu_2$     | $\nu_3$     | $\bar{x}$ | $\bar{x}_s$ | $\Delta x$ | $\Delta x_s$ |
|-----|-------------|-------------|-------------|-----------|-------------|------------|--------------|
| 3   | <b>1049</b> | <b>1076</b> | <b>1104</b> | 1077      | 1087        | 56         | 72           |
| 4   | <b>1076</b> |             |             | 1076      | 1077        | 0          | 25           |
| 5   | <b>1063</b> | <b>1079</b> | <b>1106</b> | 1083      | 1081        | 43         | 60           |
| 6   | <b>1089</b> |             |             | 1089      | 1089        | 0          | 52           |
| 7   | <b>1065</b> | <b>1092</b> | <b>1116</b> | 1091      | 1092        | 51         | 62           |
| 8   | <b>1065</b> | <b>1094</b> | <b>1124</b> | 1094      | 1097        | 59         | 74           |

$$\bar{x} = \frac{\nu_1 + \nu_2 + \nu_3}{3}$$

$$\Delta x = \nu_3 - \nu_1$$

The spectral mean is defined by the integral of the cross section in such a way that the areas on both sides are equal.

$$\bar{x}_s = \frac{\int_a^b \nu \sigma(\nu) d\nu}{\int_a^b \sigma(\nu) d\nu}$$

$$\int_{\bar{x}_s - \frac{1}{2}\Delta x_s}^{\bar{x}_s + \frac{1}{2}\Delta x_s} \sigma(\nu) d\nu = 0.9 \int_a^b \sigma(\nu) d\nu$$

Cosine similarity is used to objectively assess the agreement between calculated and measured spectra. This is a measure for the similarity of two vectors, which is calculated as follows:

$$S = \frac{\sum a_i \cdot c_i}{\sqrt{\sum a_i^2} \cdot \sqrt{\sum c_i^2}}$$

The intensities of the IRPD spectrum are interpreted as vector  $a_i$  and the intensities of the calculated spectrum are interpreted as vector  $c_i$ .  $S$ -values close to one indicates high agreement, whereas values close to zero indicate bad agreement.

The value for  $S$  given in the following tables refers only to the sulfate stretching vibrations ( $1000$  to  $1200 \text{ cm}^{-1}$ ), as these do not show any pronounced anharmonicities.





**Table S2:** Relative electronic energies, relative zero point corrected energies and value for the cosine similarity between the IRPD spectrum and calculated harmonic frequencies spectra for  $\text{SO}_4^{2-}(\text{H}_2\text{O})_3$  isomers. All energies are in kJ/mol.

(a) B3LYP+GD3BJ/6-311++G(3df,3pd)

(b) CCSD(T)/CBS\* (taken from literature)<sup>2</sup>

(c) B3LYP /6-311++G(3df,3pd) (taken from literature)<sup>2</sup>

| Isomer  | $E_{\text{el}}(\text{a})$ | $E_{\text{el}}(\text{b})$ | $E_{\text{el}}(\text{b})+E_{\text{ZP}}(\text{c})$ | $E_{\text{el}}(\text{b})+E_{\text{ZP}}(\text{a})$ | $S$           |
|---------|---------------------------|---------------------------|---------------------------------------------------|---------------------------------------------------|---------------|
| 3.3.3-1 | 0.0                       | 4.8                       | 10.1                                              | 10.7                                              | 0.3450        |
| 3.4.2-1 | 12.7                      | 15.2                      | 16.0                                              | 17.2                                              | 0.4210        |
| 3.5.1-1 | 3.8                       | 2.6                       | 5.4                                               | 5.2                                               | <b>0.9230</b> |
| 3.5.1-2 | 3.5                       | 2.5                       | 3.6                                               | 5.1                                               | 0.7876        |
| 3.5.1-3 | 10.1                      | 10.2                      | 11.1                                              | 12.4                                              | 0.1967        |
| 3.5.1-4 | 11.8                      | 11.1                      | 11.2                                              | 11.3                                              | 0.6599        |
| 3.6.0-1 | 2.9                       | 0.0                       | <b>0.0</b>                                        | <b>0.0</b>                                        | <b>0.8975</b> |
| 3.6.0-2 | 4.5                       | 1.3                       | 1.3                                               | 1.2                                               | 0.1569        |
| 3.6.0-3 | 5.1                       | 2.4                       | 1.7                                               | 2.1                                               | 0.6624        |

**Table S3:** Relative electronic energies, relative zero point corrected energies and value for the cosine similarity between the IRPD spectrum and calculated harmonic frequencies spectra for  $\text{SO}_4^{2-}(\text{H}_2\text{O})_4$  isomers. All energies are in kJ/mol.

(a) B3LYP+GD3BJ/6-311++G(3df,3pd)

(b) CCSD(T)/CBS\* (taken from literature)<sup>2</sup>

(c) B3LYP/6-311++G(3df,3pd) (taken from literature)<sup>2</sup>

| Isomer  | $E_{\text{el}}(\text{a})$ | $E_{\text{el}}(\text{b})$ | $E_{\text{el}}(\text{b})+E_{\text{ZP}}(\text{c})$ | $E_{\text{el}}(\text{b})+E_{\text{ZP}}(\text{a})$ | $S$           |
|---------|---------------------------|---------------------------|---------------------------------------------------|---------------------------------------------------|---------------|
| 4.4.4-1 | 6.6                       | 9.3                       | 15.3                                              | 17.1                                              | 0.4484        |
| 4.5.3-1 | 0.0                       | 0.0                       | 2.8                                               | 4.9                                               | 0.4230        |
| 4.5.3-2 | 8.4                       | 8.9                       | 12.2                                              | 14.4                                              | 0.0936        |
| 4.6.2-1 | 10.4                      | 6.7                       | 8.1                                               | 9.1                                               | 0.5475        |
| 4.6.2-2 | 8.3                       | 5.1                       | 6.7                                               | 8.5                                               | 0.5065        |
| 4.6.2-3 | 8.4                       | 6.4                       | 7.4                                               | 9.9                                               | 0.4484        |
| 4.7.1-1 | 7.2                       | 1.6                       | <b>0.0</b>                                        | 2.3                                               | 0.3151        |
| 4.7.1-2 | 7.3                       | 1.8                       | <b>0.5</b>                                        | 2.4                                               | 0.4929        |
| 4.7.1-3 | 11.7                      | n.a.                      | n.a.                                              | n.a.                                              | 0.2193        |
| 4.8.0-1 | 8.7                       | 2.1                       | 1.3                                               | <b>0.0</b>                                        | <b>0.9906</b> |
| 4.8.0-2 | 10.1                      | 3.1                       | <b>0.3</b>                                        | <b>0.7</b>                                        | 0.3929        |

**Table S4:** Relative electronic energies, relative zero point corrected energies and value for the cosine similarity between the IRPD spectrum and calculated harmonic frequencies spectra for  $\text{SO}_4^{2-}(\text{H}_2\text{O})_5$  isomers. All energies are in kJ/mol.

(a) B3LYP+GD3BJ/6-311++G(3df,3pd)

(b) CCSD(T)/CBS\* (taken from literature)<sup>2</sup>

(c) B3LYP/6-311++G(3df,3pd) (taken from literature)<sup>2</sup>

| Isomer   | $E_{\text{el}}$ (a) | $E_{\text{el}}$ (b) | $E_{\text{el}}(\text{b})+E_{\text{ZP}}(\text{c})$ | $E_{\text{el}}(\text{b})+E_{\text{ZP}}(\text{a})$ | S             |
|----------|---------------------|---------------------|---------------------------------------------------|---------------------------------------------------|---------------|
| 5.6.4-1  | 2.0                 | 4.6                 | 8.0                                               | 7.8                                               | 0.3364        |
| 5.6.4-2  | 2.1                 | 4.7                 | 7.3                                               | 7.9                                               | 0.3859        |
| 5.6.4-3  | 2.1                 | 5.7                 | 8.6                                               | 9.1                                               | 0.3399        |
| 5.6.4-4  | 1.2                 | 4.1                 | 6.5                                               | 6.9                                               | 0.3323        |
| 5.6.4-5  | 0.8                 | 3.6                 | 5.6                                               | 6.4                                               | 0.3308        |
| 5.6.4-6  | 1.6                 | 5.6                 | 8.0                                               | 8.4                                               | 0.2829        |
| 5.6.4-7  | 3.3                 | 6.4                 | 9.7                                               | 9.5                                               | 0.3201        |
| 5.7.3-1  | 0.0                 | 0.0                 | 0.6                                               | <b>0.0</b>                                        | <b>0.8869</b> |
| 5.7.3-2  | 5.3                 | 5.7                 | 6.7                                               | 6.3                                               | 0.3121        |
| 5.7.3-3  | 19.0                | n.a.                | n.a.                                              | n.a.                                              | 0.4629        |
| 5.8.2-1  | 9.2                 | n.a.                | n.a.                                              | n.a.                                              | 0.5991        |
| 5.9.1-1  | 10.8                | 5.8                 | <b>0.0</b>                                        | 0.8                                               | 0.7032        |
| 5.10.0-1 | 15.1                | 9.2                 | 3.5                                               | 0.8                                               | 0.6798        |

**Table S5:** Relative electronic energies, relative zero point corrected energies and value for the cosine similarity between the IRPD spectrum and calculated harmonic frequencies spectra for  $\text{SO}_4^{2-}(\text{H}_2\text{O})_6$  isomers. All energies are in kJ/mol.

(a) B3LYP+GD3BJ/6-311++G(3df,3pd)

(b) CCSD(T)/CBS\* (taken from literature)<sup>2</sup>

(c) B3LYP/6-311++G(3df,3pd) (taken from literature)<sup>2</sup>

| Isomer   | $E_{\text{el}}(\text{a})$ | $E_{\text{el}}(\text{b})$ | $E_{\text{el}}(\text{b})+E_{\text{ZP}}(\text{c})$ | $E_{\text{el}}(\text{b})+E_{\text{ZP}}(\text{a})$ | $S$           |
|----------|---------------------------|---------------------------|---------------------------------------------------|---------------------------------------------------|---------------|
| 6.6.5-1  | 15.5                      | n.a.                      | n.a.                                              | n.a.                                              | 0.2612        |
| 6.6.6-1  | 0.0                       | 0.0                       | 6.7                                               | 5.3                                               | 0.3239        |
| 6.6.6-2  | 0.6                       | 0.8                       | 7.8                                               | 6.3                                               | 0.3200        |
| 6.6.6-3  | 4.7                       | n.a.                      | n.a.                                              | n.a.                                              | 0.3864        |
| 6.6.6-4  | 9.9                       | n.a.                      | n.a.                                              | n.a.                                              | 0.4782        |
| 6.6.6-5  | 13.0                      | n.a.                      | n.a.                                              | n.a.                                              | 0.4123        |
| 6.6.6-6  | 33.4                      | n.a.                      | n.a.                                              | n.a.                                              | 0.0861        |
| 6.7.5-1  | 3.0                       | 2.1                       | 8.3                                               | 6.4                                               | 0.3876        |
| 6.7.5-3  | 4.5                       | 4.1                       | 9.7                                               | 8.1                                               | 0.4015        |
| 6.7.5-5  | 8.4                       | 4.3                       | 8.6                                               | 6.2                                               | 0.3378        |
| 6.7.5-7  | 7.7                       | n.a.                      | n.a.                                              | n.a.                                              | 0.4566        |
| 6.7.5-8  | 9.0                       | n.a.                      | n.a.                                              | n.a.                                              | 0.4222        |
| 6.7.5-9  | 11.8                      | n.a.                      | n.a.                                              | n.a.                                              | 0.3137        |
| 6.7.5-10 | 14.8                      | n.a.                      | n.a.                                              | n.a.                                              | 0.3374        |
| 6.7.5-11 | 14.3                      | n.a.                      | n.a.                                              | n.a.                                              | 0.2597        |
| 6.7.5-12 | 13.9                      | n.a.                      | n.a.                                              | n.a.                                              | 0.4116        |
| 6.7.5-13 | 19.5                      | n.a.                      | n.a.                                              | n.a.                                              | 0.2318        |
| 6.7.5-14 | 20.5                      | n.a.                      | n.a.                                              | n.a.                                              | 0.2536        |
| 6.8.4-1  | 8.7                       | 3.5                       | 5.9                                               | 4.3                                               | 0.7906        |
| 6.8.4-3  | 9.8                       | 4.8                       | 6.8                                               | 5.5                                               | 0.4655        |
| 6.8.4-5  | 8.4                       | 2.8                       | 4.1                                               | 2.9                                               | 0.8709        |
| 6.8.4-6  | 8.8                       | 3.3                       | 5.1                                               | 3.6                                               | 0.8759        |
| 6.8.4-9  | 8.7                       | n.a.                      | n.a.                                              | n.a.                                              | 0.6255        |
| 6.8.4-10 | 9.4                       | n.a.                      | n.a.                                              | n.a.                                              | 0.7794        |
| 6.8.4-11 | 14.4                      | n.a.                      | n.a.                                              | n.a.                                              | 0.3880        |
| 6.8.4-12 | 14.4                      | n.a.                      | n.a.                                              | n.a.                                              | 0.4564        |
| 6.8.4-13 | 15.7                      | n.a.                      | n.a.                                              | n.a.                                              | 0.8174        |
| 6.8.4-14 | 16.3                      | n.a.                      | n.a.                                              | n.a.                                              | 0.6288        |
| 6.8.4-15 | 18.4                      | n.a.                      | n.a.                                              | n.a.                                              | 0.5545        |
| 6.8.4-16 | 17.8                      | n.a.                      | n.a.                                              | n.a.                                              | 0.5158        |
| 6.8.4-17 | 21.2                      | n.a.                      | n.a.                                              | n.a.                                              | 0.4138        |
| 6.8.4-18 | 21.0                      | n.a.                      | n.a.                                              | n.a.                                              | 0.3342        |
| 6.8.4-19 | 19.6                      | n.a.                      | n.a.                                              | n.a.                                              | 0.8690        |
| 6.9.3-1  | 11.1                      | 3.2                       | <b>0.0</b>                                        | <b>0.0</b>                                        | <b>0.9493</b> |
| 6.9.3-2  | 20.3                      | n.a.                      | n.a.                                              | n.a.                                              | 0.5490        |
| 6.9.3-3  | 20.8                      | n.a.                      | n.a.                                              | n.a.                                              | 0.6495        |
| 6.12.0-1 | 30.3                      | 17.5                      | 5.8                                               | 5.7                                               | 0.7330        |

**Table S6:** Relative energies of  $\text{SO}_4^{2-}(\text{H}_2\text{O})_7$  isomers (all in kJ/mol) and value for the cosine similarity between the IRPD spectrum and calculated harmonic frequencies at B3LYP+GD3BJ/6-311++G(3df,3pd) level of theory. The labels given here no longer correspond to those of Lambrecht *et al.*<sup>3</sup> due to methodical mistakes we have re-labeled them.

| Isomer   | $E_{\text{el}}$ | $E_{\text{el}} + E_{\text{ZP}}$ | $S$           |
|----------|-----------------|---------------------------------|---------------|
| 7.6.7-1  | 0.0             | 0.0                             | 0.4088        |
| 7.6.7-2  | 9.5             | 7.6                             | 0.4208        |
| 7.7.7-1  | 3.0             | 2.4                             | 0.3407        |
| 7.7.7-2  | 3.2             | 2.6                             | 0.3404        |
| 7.7.7-3  | 14.3            | 11.6                            | 0.2409        |
| 7.7.7-4  | 21.1            | 15.6                            | 0.2550        |
| 7.8.6-1  | 4.4             | 0.5                             | <b>0.9043</b> |
| 7.8.6-2  | 5.0             | 1.2                             | 0.8976        |
| 7.8.6-3  | 7.2             | 4.6                             | 0.4813        |
| 7.8.6-4  | 7.4             | 3.5                             | 0.8605        |
| 7.8.6-5  | 7.5             | 5.0                             | 0.4025        |
| 7.8.6-6  | 7.9             | 5.2                             | 0.3685        |
| 7.8.6-7  | 8.1             | 4.2                             | 0.6398        |
| 7.8.6-8  | 10.6            | 7.0                             | 0.4217        |
| 7.8.6-9  | 11.3            | 7.2                             | 0.5937        |
| 7.8.6-10 | 11.6            | 7.5                             | 0.3762        |
| 7.8.6-11 | 12.5            | 8.4                             | 0.5010        |
| 7.8.6-12 | 13.0            | 7.1                             | 0.8697        |
| 7.8.6-13 | 13.1            | 8.2                             | 0.6702        |
| 7.8.6-14 | 13.9            | 9.1                             | 0.4176        |
| 7.8.6-15 | 16.8            | 12.5                            | 0.2277        |
| 7.8.6-16 | 17.0            | 13.6                            | 0.2105        |
| 7.8.6-17 | 19.2            | 13.5                            | 0.5147        |
| 7.8.6-18 | 20.0            | 14.7                            | 0.3773        |
| 7.8.6-19 | 20.4            | 14.5                            | 0.6113        |
| 7.8.6-20 | 23.1            | 16.0                            | 0.3120        |
| 7.8.6-21 | 37.5            | 29.0                            | 0.2619        |
| 7.9.5-1  | 8.1             | 2.5                             | 0.7935        |
| 7.9.5-2  | 9.2             | 3.6                             | 0.3574        |
| 7.9.5-3  | 13.7            | 7.7                             | 0.7320        |
| 7.9.5-4  | 14.3            | 6.2                             | 0.7969        |
| 7.9.5-5  | 15.7            | 9.1                             | 0.6687        |
| 7.9.5-6  | 15.7            | 8.5                             | 0.7637        |
| 7.9.5-7  | 16.0            | 9.4                             | 0.8223        |
| 7.9.5-8  | 19.2            | 11.1                            | 0.4759        |
| 7.9.5-9  | 21.4            | 14.3                            | 0.6849        |
| 7.10.4-1 | 16.6            | 7.3                             | 0.7962        |
| 7.11.2-1 | 40.5            | 22.4                            | 0.7176        |
| 7.12.2-1 | 36.0            | 18.6                            | 0.7628        |

**Table S7:** Results for the relative energies of  $\text{SO}_4^{2-}(\text{H}_2\text{O})_8$  isomers (all in kJ/mol) and value for the cosine similarity between the IRPD spectrum and calculated harmonic frequencies calculated at B3LYP+GD3BJ/6-311++G(3df,3pd) level of theory.

| Isomer   | $E_{\text{el}}$ | $E_{\text{el}} + E_{\text{ZP}}$ | $S$           |
|----------|-----------------|---------------------------------|---------------|
| 8.7.9-1  | 5.6             | 5.7                             | 0.4152        |
| 8.7.9-2  | 6.5             | 6.1                             | 0.6417        |
| 8.7.9-3  | 6.6             | 6.1                             | 0.6607        |
| 8.7.9-4  | 4.3             | 6.8                             | 0.4610        |
| 8.7.9-5  | 6.8             | 7.6                             | 0.4570        |
| 8.8.8-1  | 1.2             | 0.0                             | 0.7267        |
| 8.8.8-2  | 1.5             | 0.3                             | 0.5606        |
| 8.8.8-3  | 0.0             | 1.3                             | 0.5714        |
| 8.8.8-4  | 0.8             | 1.8                             | 0.3534        |
| 8.8.8-5  | 0.8             | 1.9                             | 0.3029        |
| 8.8.8-6  | 1.1             | 2.2                             | 0.4451        |
| 8.8.8-7  | 3.0             | 4.7                             | 0.5107        |
| 8.8.8-8  | 4.7             | 5.2                             | 0.5181        |
| 8.9.7-1  | 7.3             | 5.0                             | 0.5256        |
| 8.9.7-2  | 6.6             | 5.1                             | <b>0.9566</b> |
| 8.9.7-3  | 7.5             | 5.2                             | <b>0.9572</b> |
| 8.9.7-4  | 10.9            | 8.1                             | 0.2214        |
| 8.9.7-5  | 10.8            | 8.2                             | 0.5225        |
| 8.9.7-6  | 11.3            | 9.4                             | 0.6476        |
| 8.9.7-7  | 11.6            | 9.8                             | 0.4535        |
| 8.9.7-8  | 13.0            | 10.8                            | 0.5054        |
| 8.11.5-1 | 29.3            | 18.2                            | 0.4650        |
| 8.12.4-1 | 41.5            | 25.7                            | 0.5091        |
| 8.12.4-2 | 46.3            | 30.2                            | 0.8589        |

## References

1. J. Zhou, G. Santambrogio, M. Brümmer, D.T. Moore, L. Wöste, G. Meijer, D.M. Neumark and K.R. Asmis, *J. Chem. Phys.*, 2006, **125**(11), 111102.
2. D.S. Lambrecht, L. McCaslin, S.S. Xantheas, E. Epifanovsky and M. Head-Gordon, *Mol. Phys.*, 2012, **110**(19-20), 2513.
3. D.S. Lambrecht, G.N.I. Clark, T. Head-Gordon and M. Head-Gordon, *J. Phys. Chem. A*, 2011, **115**(41), 11438.
