# Supplementary material for: Cryogenic ion trap vibrational spectroscopy of the microhydrated sulfate dianions SO42−(H2O)3−8
Source: Royal Society of Chemistry journal article supplement (doi:10.1039/d0cp04386a), 2020-01-01
Supplement: d0cp04386a6.pdf [file d0cp04386a6.pdf]

## Structures of $\text{SO}_4^{2-}(\text{H}_2\text{O})_7$

| <b>atom</b> | <b>x</b>  | <b>y</b>  | <b>z</b>  |
|-------------|-----------|-----------|-----------|
| 8           | -0.444186 | -0.413285 | 1.286762  |
| 16          | -0.477760 | -1.234765 | 0.029778  |
| 8           | -1.835708 | -1.805631 | -0.143248 |
| 8           | 0.542771  | -2.298413 | 0.098720  |
| 8           | -0.185595 | -0.322963 | -1.132559 |
| 1           | 0.921731  | 2.668403  | -0.230020 |
| 8           | 1.872730  | 2.685913  | -0.006991 |
| 1           | 1.958736  | 2.017356  | 0.707314  |
| 1           | 1.453099  | 0.127413  | -1.698484 |
| 8           | 2.341737  | 0.512597  | -1.871489 |
| 1           | 2.317621  | 1.327131  | -1.336268 |
| 1           | -2.881189 | 0.715308  | -1.379513 |
| 8           | -3.521324 | 0.133150  | -0.954220 |
| 1           | -2.955719 | -0.641388 | -0.688826 |
| 1           | -3.081645 | 0.988808  | 0.813161  |
| 8           | -2.512766 | 1.372970  | 1.501061  |
| 1           | -1.781493 | 0.712166  | 1.552980  |
| 1           | -0.615601 | 1.332867  | -0.917764 |
| 8           | -0.880970 | 2.270133  | -0.744156 |
| 1           | -1.396053 | 2.193070  | 0.078084  |
| 1           | 3.061806  | -0.761819 | -0.640330 |
| 8           | 3.157489  | -1.392244 | 0.098813  |
| 1           | 2.264745  | -1.807262 | 0.130747  |
| 1           | 2.576254  | -0.064280 | 1.377797  |
| 8           | 2.049563  | 0.594187  | 1.869093  |
| 1           | 1.131932  | 0.257169  | 1.740389  |

7.6.7-1

## 7.6.7-2

| <b>atom</b> | <b>x</b>  | <b>y</b>  | <b>z</b>  |
|-------------|-----------|-----------|-----------|
| 8           | 2.001572  | -1.327254 | -0.839046 |
| 16          | 0.628798  | -1.022217 | -0.365935 |
| 8           | 0.720785  | -0.217622 | 0.905524  |
| 8           | -0.127546 | -2.263525 | -0.107647 |
| 8           | -0.082704 | -0.202862 | -1.399173 |
| 1           | 3.320793  | -0.592024 | -0.147814 |
| 8           | 4.060024  | -0.151909 | 0.360433  |
| 1           | 3.723163  | -0.195715 | 1.259972  |
| 1           | 0.065675  | 1.547506  | -1.340385 |
| 8           | 0.099181  | 2.520290  | -1.178340 |
| 1           | 0.814851  | 2.590033  | -0.523893 |
| 1           | -1.968221 | 1.215052  | 1.484257  |
| 8           | -1.635559 | 0.565596  | 2.131429  |
| 1           | -0.775034 | 0.284553  | 1.746391  |
| 1           | -1.747724 | -2.118453 | 0.646276  |
| 8           | -2.623789 | -1.876618 | 1.025629  |
| 1           | -2.410506 | -1.071235 | 1.536096  |
| 1           | 2.933957  | 1.674744  | 0.446495  |
| 8           | 2.143588  | 2.076772  | 0.834218  |
| 1           | 1.560336  | 1.281030  | 0.928118  |
| 1           | -1.620919 | 2.469461  | -0.389800 |
| 8           | -2.514594 | 2.254242  | -0.054177 |
| 1           | -2.738696 | 1.426837  | -0.529559 |
| 1           | -1.864606 | -0.287168 | -1.462040 |
| 8           | -2.840324 | -0.253955 | -1.332256 |
| 1           | -2.958911 | -0.854391 | -0.571890 |

---

| <b>atom</b> | <b>x</b>  | <b>y</b>  | <b>z</b>  |
|-------------|-----------|-----------|-----------|
| 8           | -0.300197 | 0.024022  | -1.222793 |
| 16          | -0.199829 | -0.799670 | 0.027172  |
| 8           | -0.297631 | 0.115119  | 1.210904  |
| 8           | 1.122179  | -1.485656 | 0.052163  |
| 8           | -1.292614 | -1.791625 | 0.066403  |
| 1           | 2.450769  | -0.898826 | 1.275294  |
| 8           | 3.218999  | -0.391171 | 1.607688  |
| 1           | 2.858963  | 0.518102  | 1.591227  |
| 1           | 3.737304  | -0.581622 | -0.328653 |
| 8           | 3.462389  | -0.801484 | -1.235754 |
| 1           | 2.562744  | -1.146959 | -1.047586 |
| 1           | -1.945080 | 0.742618  | 1.553381  |
| 8           | -2.881664 | 1.044582  | 1.596991  |
| 1           | -3.360582 | 0.307112  | 1.184790  |
| 1           | -2.714757 | 1.676519  | -0.350615 |
| 8           | -2.637294 | 1.520889  | -1.306300 |
| 1           | -1.786787 | 1.028063  | -1.367589 |
| 1           | -2.968158 | -1.354338 | -0.210943 |
| 8           | -3.860913 | -0.957409 | -0.351308 |
| 1           | -3.646153 | -0.181458 | -0.895931 |
| 1           | 0.961666  | 1.406693  | 1.284221  |
| 8           | 1.743806  | 1.999120  | 1.205959  |
| 1           | 1.870271  | 2.041738  | 0.239082  |
| 1           | 1.068104  | 1.129429  | -1.553761 |
| 8           | 1.915239  | 1.623950  | -1.646795 |
| 1           | 2.570573  | 0.904976  | -1.624924 |

---

7.7.7-1

| <b>atom</b> | <b>x</b>  | <b>y</b>  | <b>z</b>  |
|-------------|-----------|-----------|-----------|
| 8           | -0.302692 | -0.070918 | 1.221516  |
| 16          | -0.200742 | 0.792836  | 0.000500  |
| 8           | -0.296124 | -0.083360 | -1.213745 |
| 8           | 1.120819  | 1.480213  | 0.000027  |
| 8           | -1.293612 | 1.785389  | -0.011377 |
| 1           | -3.662750 | 0.164475  | 0.879189  |
| 8           | -3.869946 | 0.952836  | 0.349494  |
| 1           | -2.974384 | 1.350080  | 0.229265  |
| 1           | 2.467079  | 0.970125  | 1.231357  |
| 8           | 3.241183  | 0.484032  | 1.582109  |
| 1           | 2.886481  | -0.427202 | 1.609953  |
| 1           | 2.547725  | 1.091544  | -1.102362 |
| 8           | 3.446726  | 0.741245  | -1.284881 |
| 1           | 3.735572  | 0.571298  | -0.371526 |
| 1           | -1.805246 | -1.059454 | 1.339601  |
| 8           | -2.659381 | -1.543418 | 1.261006  |
| 1           | -2.728840 | -1.679601 | 0.301799  |
| 1           | -3.358096 | -0.277399 | -1.208649 |
| 8           | -2.876638 | -1.005512 | -1.634475 |
| 1           | -1.940276 | -0.704976 | -1.577666 |
| 1           | 1.059449  | -1.209739 | -1.493429 |
| 8           | 1.906961  | -1.707687 | -1.566884 |
| 1           | 2.560625  | -0.987090 | -1.587107 |
| 1           | 0.988057  | -1.337714 | 1.358714  |
| 8           | 1.775969  | -1.924275 | 1.302822  |
| 1           | 1.890349  | -2.018083 | 0.337955  |

7.7.7-2

| <b>atom</b> | <b>x</b>  | <b>y</b>  | <b>z</b>  |
|-------------|-----------|-----------|-----------|
| 8           | -1.116591 | -1.612430 | 0.647745  |
| 16          | 0.242221  | -1.259042 | 0.150863  |
| 8           | 0.084015  | -0.417466 | -1.088122 |
| 8           | 1.052053  | -2.445670 | -0.156507 |
| 8           | 0.942319  | -0.437709 | 1.198380  |
| 1           | 0.533029  | 1.165917  | 1.692666  |
| 8           | 0.222284  | 2.070444  | 1.937108  |
| 1           | 0.279906  | 2.557321  | 1.095810  |
| 1           | -1.227936 | 0.667302  | -1.161129 |
| 8           | -1.951169 | 1.343127  | -1.111967 |
| 1           | -2.227725 | 1.275279  | -0.177043 |
| 1           | 3.139456  | -1.507675 | -0.144274 |
| 8           | 3.499424  | -0.732321 | 0.311186  |
| 1           | 2.691775  | -0.490209 | 0.821931  |
| 1           | 1.430763  | 0.545689  | -1.529086 |
| 8           | 2.206776  | 1.151926  | -1.633392 |
| 1           | 2.839735  | 0.746864  | -1.020129 |
| 1           | -1.500522 | 1.284631  | 1.889213  |
| 8           | -2.304786 | 0.775848  | 1.668065  |
| 1           | -1.955516 | -0.107714 | 1.427604  |
| 1           | -2.543754 | -1.677166 | -0.584173 |
| 8           | -3.293218 | -1.459753 | -1.174487 |
| 1           | -3.104268 | -0.536098 | -1.387638 |
| 1           | -0.497427 | 2.632127  | -0.955418 |
| 8           | 0.312424  | 3.143839  | -0.765788 |
| 1           | 1.038682  | 2.549724  | -1.039912 |

7.7.7-3

| <b>atom</b> | <b>x</b>  | <b>y</b>  | <b>z</b>  |
|-------------|-----------|-----------|-----------|
| 8           | -1.885687 | 0.820363  | -0.126176 |
| 16          | -1.158527 | -0.483461 | -0.094960 |
| 8           | -0.063540 | -0.447269 | -1.119956 |
| 8           | -2.077127 | -1.599161 | -0.362778 |
| 8           | -0.528826 | -0.644498 | 1.261160  |
| 1           | 0.874383  | 0.999802  | -1.181778 |
| 8           | 1.432041  | 1.813070  | -1.086506 |
| 1           | 0.817547  | 2.453393  | -0.690765 |
| 1           | 1.760663  | 1.296267  | 0.909763  |
| 8           | 1.442817  | 1.136928  | 1.813266  |
| 1           | 0.667362  | 0.539981  | 1.660486  |
| 1           | -3.895904 | 0.490604  | -0.469952 |
| 8           | -4.533407 | -0.223658 | -0.631602 |
| 1           | -3.897049 | -0.962201 | -0.595643 |
| 1           | -1.100555 | 2.288582  | 0.376567  |
| 8           | -0.540381 | 3.054929  | 0.658262  |
| 1           | 0.047737  | 2.649769  | 1.312802  |
| 1           | 3.231302  | 1.003415  | -1.376006 |
| 8           | 3.927933  | 0.336247  | -1.471195 |
| 1           | 3.446527  | -0.495500 | -1.289456 |
| 1           | 2.146544  | -0.981350 | 2.103934  |
| 8           | 1.798393  | -1.873320 | 1.967683  |
| 1           | 0.873095  | -1.662655 | 1.700293  |
| 1           | 1.400103  | -1.480528 | -1.056246 |
| 8           | 2.265790  | -1.920300 | -0.896461 |
| 1           | 2.260627  | -2.030857 | 0.069780  |

7.7.7-4

| <b>atom</b> | <b>x</b>  | <b>y</b>  | <b>z</b>  |
|-------------|-----------|-----------|-----------|
| 8           | 1.215334  | 1.434346  | -0.005195 |
| 16          | 0.000000  | 0.578608  | 0.000003  |
| 8           | -1.215332 | 1.434348  | 0.005205  |
| 8           | 0.003148  | -0.292949 | 1.215841  |
| 8           | -0.003148 | -0.292943 | -1.215840 |
| 1           | 2.827998  | 0.741028  | 0.262767  |
| 8           | 3.648935  | 0.211188  | 0.385583  |
| 1           | 3.321505  | -0.546335 | 0.899650  |
| 1           | -1.552004 | -1.132060 | 1.589288  |
| 8           | -2.437156 | -1.557981 | 1.642075  |
| 1           | -3.009332 | -0.910866 | 1.197905  |
| 1           | -3.321505 | -0.546326 | -0.899648 |
| 8           | -3.648935 | 0.211193  | -0.385576 |
| 1           | -2.827998 | 0.741032  | -0.262758 |
| 1           | 0.729835  | 3.391151  | -0.001271 |
| 8           | 0.000003  | 4.033260  | -0.000003 |
| 1           | -0.729831 | 3.391152  | 0.001269  |
| 1           | -1.325290 | -1.512623 | -1.316353 |
| 8           | -2.100748 | -2.113408 | -1.236495 |
| 1           | -2.163447 | -2.241817 | -0.275721 |
| 1           | 1.552004  | -1.132051 | -1.589293 |
| 8           | 2.437155  | -1.557972 | -1.642083 |
| 1           | 3.009332  | -0.910861 | -1.197907 |
| 1           | 1.325287  | -1.512633 | 1.316347  |
| 8           | 2.100744  | -2.113419 | 1.236485  |
| 1           | 2.163444  | -2.241821 | 0.275710  |

7.8.6-1



## 7.8.6-2

| <b>atom</b> | <b>x</b>  | <b>y</b>  | <b>z</b>  |
|-------------|-----------|-----------|-----------|
| 16          | 0.000000  | 0.568715  | 0.009062  |
| 8           | 0.000001  | -0.299231 | 1.227521  |
| 8           | -1.214820 | 1.425200  | 0.004441  |
| 8           | 1.214819  | 1.425201  | 0.004440  |
| 8           | -0.000001 | -0.306455 | -1.204141 |
| 8           | -3.671938 | 0.234447  | 0.324869  |
| 8           | 3.671938  | 0.234450  | 0.324863  |
| 8           | 2.419663  | -1.601989 | -1.618307 |
| 8           | -0.000002 | 4.023909  | -0.016722 |
| 8           | 2.156990  | -2.062724 | 1.279507  |
| 8           | -2.419665 | -1.601987 | -1.618310 |
| 8           | -2.156986 | -2.062729 | 1.279504  |
| 1           | -3.364209 | -0.510959 | 0.868209  |
| 1           | -2.842944 | 0.754506  | 0.214500  |
| 1           | 2.842943  | 0.754508  | 0.214495  |
| 1           | 1.535766  | -1.172497 | -1.564622 |
| 1           | 0.729774  | 3.381748  | -0.010901 |
| 1           | -0.729776 | 3.381747  | -0.010898 |
| 1           | 1.372063  | -1.474875 | 1.357495  |
| 1           | -3.000466 | -0.939284 | -1.209696 |
| 1           | -1.535767 | -1.172494 | -1.564624 |
| 1           | -1.372060 | -1.474878 | 1.357492  |
| 1           | -2.199286 | -2.220736 | 0.321854  |
| 1           | 2.199290  | -2.220733 | 0.321858  |
| 1           | 3.364211  | -0.510954 | 0.868206  |
| 1           | 3.000465  | -0.939286 | -1.209697 |

## 7.8.6-3

| <b>atom</b> | <b>x</b>  | <b>y</b>  | <b>z</b>  |
|-------------|-----------|-----------|-----------|
| 8           | 0.493901  | -0.626850 | -1.530708 |
| 16          | -0.717898 | -0.304984 | -0.719691 |
| 8           | -0.951111 | 1.165941  | -0.727179 |
| 8           | -0.476223 | -0.747582 | 0.706226  |
| 8           | -1.895516 | -1.019654 | -1.250731 |
| 1           | 3.216222  | 0.308111  | -0.519710 |
| 8           | 2.889338  | 0.728607  | -1.335804 |
| 1           | 2.024778  | 0.281369  | -1.482096 |
| 1           | 1.431876  | -2.103415 | -0.673003 |
| 8           | 1.581260  | -2.560533 | 0.176584  |
| 1           | 0.833692  | -2.153934 | 0.658651  |
| 1           | -3.627959 | 0.765613  | 0.811745  |
| 8           | -3.506989 | 1.686876  | 0.533399  |
| 1           | -2.648580 | 1.639994  | 0.070150  |
| 1           | 2.898462  | -1.381879 | 0.867076  |
| 8           | 3.422426  | -0.621190 | 1.186967  |
| 1           | 2.737479  | -0.045276 | 1.593147  |
| 1           | 1.294786  | 1.681061  | 1.460913  |
| 8           | 1.266722  | 0.926697  | 2.080733  |
| 1           | 0.588575  | 0.344620  | 1.668634  |
| 1           | -2.439975 | -1.114813 | 1.465983  |
| 8           | -3.324592 | -1.245788 | 1.089273  |
| 1           | -3.059435 | -1.276979 | 0.143511  |
| 1           | 0.406590  | 2.278235  | -0.365540 |
| 8           | 1.240241  | 2.744522  | -0.128436 |
| 1           | 1.914209  | 2.208664  | -0.587017 |

## 7.8.6-4

| <b>atom</b> | <b>x</b>  | <b>y</b>  | <b>z</b>  |
|-------------|-----------|-----------|-----------|
| 8           | 0.910455  | -1.633122 | -0.049478 |
| 16          | 0.908028  | -0.146997 | -0.003706 |
| 8           | 2.298110  | 0.371918  | 0.024456  |
| 8           | 0.177277  | 0.321647  | 1.216085  |
| 8           | 0.204123  | 0.391641  | -1.214573 |
| 1           | -0.555086 | 1.993882  | -0.707434 |
| 8           | -0.891759 | 2.581213  | 0.004961  |
| 1           | -0.617378 | 2.018047  | 0.756017  |
| 1           | -2.109217 | -1.602695 | -1.254441 |
| 8           | -2.168226 | -0.832857 | -1.852445 |
| 1           | -1.285273 | -0.412210 | -1.725845 |
| 1           | 2.312979  | 2.256565  | 0.053880  |
| 8           | 2.161658  | 3.224452  | 0.065752  |
| 1           | 1.196766  | 3.277824  | 0.046911  |
| 1           | -0.686498 | -2.455813 | 0.110469  |
| 8           | -1.620390 | -2.752496 | 0.199430  |
| 1           | -1.971840 | -2.134935 | 0.868611  |
| 1           | 3.608530  | -1.116314 | -0.021634 |
| 8           | 3.755382  | -2.078228 | -0.053176 |
| 1           | 2.821071  | -2.344390 | -0.065329 |
| 1           | -1.396443 | -0.286250 | 1.732555  |
| 8           | -2.327061 | -0.561405 | 1.905300  |
| 1           | -2.830548 | -0.016730 | 1.274766  |
| 1           | -3.064358 | 0.417307  | -0.865245 |
| 8           | -3.410558 | 1.097522  | -0.245439 |
| 1           | -2.663236 | 1.715383  | -0.150964 |

## 7.8.6-5

| <b>atom</b> | <b>x</b>  | <b>y</b>  | <b>z</b>  |
|-------------|-----------|-----------|-----------|
| 8           | -0.958566 | 1.091696  | -0.854244 |
| 16          | -0.711984 | -0.369281 | -0.702958 |
| 8           | -0.456977 | -0.673298 | 0.753154  |
| 8           | 0.500039  | -0.755865 | -1.490555 |
| 8           | -1.883846 | -1.142979 | -1.159289 |
| 1           | 0.944000  | -2.132485 | 0.831096  |
| 8           | 1.651220  | -2.520525 | 0.285996  |
| 1           | 1.399866  | -2.088024 | -0.558057 |
| 1           | 1.882964  | 0.379754  | -1.545790 |
| 8           | 2.636593  | 0.998506  | -1.410840 |
| 1           | 2.204735  | 1.735617  | -0.935093 |
| 1           | 0.263860  | 2.253523  | -0.235215 |
| 8           | 1.026048  | 2.744258  | 0.147701  |
| 1           | 1.205554  | 2.235155  | 0.960638  |
| 1           | -2.413914 | -1.002006 | 1.559452  |
| 8           | -3.296234 | -1.181663 | 1.197944  |
| 1           | -3.031168 | -1.294429 | 0.258146  |
| 1           | -2.674282 | 1.604088  | -0.102746 |
| 8           | -3.532309 | 1.677975  | 0.357210  |
| 1           | -3.634167 | 0.785848  | 0.724120  |
| 1           | 0.706733  | 0.289053  | 1.717142  |
| 8           | 1.425684  | 0.770173  | 2.186689  |
| 1           | 2.237005  | 0.372197  | 1.823303  |
| 1           | 3.391907  | 0.049670  | -0.022669 |
| 8           | 3.621692  | -0.507379 | 0.752663  |
| 1           | 3.041888  | -1.286652 | 0.641582  |

## 7.8.6-6

| <b>atom</b> | <b>x</b>  | <b>y</b>  | <b>z</b>  |
|-------------|-----------|-----------|-----------|
| 8           | 0.472258  | 0.942391  | 0.500973  |
| 16          | 0.735132  | 0.115741  | -0.734484 |
| 8           | 1.923958  | 0.639650  | -1.435557 |
| 8           | -0.466105 | 0.196574  | -1.619878 |
| 8           | 0.966265  | -1.297736 | -0.320849 |
| 1           | -1.336748 | -1.226794 | 1.818698  |
| 8           | -1.344059 | -0.332594 | 2.210996  |
| 1           | -0.648956 | 0.130745  | 1.692865  |
| 1           | 2.111557  | 1.126575  | 1.548972  |
| 8           | 2.996593  | 1.072822  | 1.956501  |
| 1           | 3.441032  | 0.435742  | 1.375392  |
| 1           | -2.805140 | 0.439180  | 1.433143  |
| 8           | -3.482039 | 0.867263  | 0.863528  |
| 1           | -2.954966 | 1.523600  | 0.366531  |
| 1           | 3.396346  | -0.215933 | -0.734081 |
| 8           | 3.830235  | -0.877294 | -0.151761 |
| 1           | 3.043238  | -1.414048 | 0.037238  |
| 1           | -1.980933 | -0.713060 | -1.389917 |
| 8           | -2.844720 | -1.123530 | -1.157658 |
| 1           | -3.209569 | -0.499602 | -0.503736 |
| 1           | -0.381390 | -2.286877 | 0.271562  |
| 8           | -1.213247 | -2.699100 | 0.601597  |
| 1           | -1.881571 | -2.326294 | -0.003443 |
| 1           | -1.410518 | 1.798262  | -1.223759 |
| 8           | -1.620994 | 2.495823  | -0.570764 |
| 1           | -0.889657 | 2.302499  | 0.045245  |

| <b>atom</b> | <b>x</b>  | <b>y</b>  | <b>z</b>  |
|-------------|-----------|-----------|-----------|
| 8           | 0.071433  | 0.206872  | -1.263726 |
| 16          | 1.006231  | 0.053107  | -0.102437 |
| 8           | 2.186811  | 0.925500  | -0.302719 |
| 8           | 1.402604  | -1.373393 | 0.021195  |
| 8           | 0.295698  | 0.480030  | 1.149381  |
| 1           | -1.187243 | -0.222814 | 1.747986  |
| 8           | -2.042249 | -0.646929 | 1.993570  |
| 1           | -2.648214 | -0.319049 | 1.304404  |
| 1           | -1.314825 | -2.257709 | 1.272775  |
| 8           | -0.842619 | -2.924545 | 0.736942  |
| 1           | -0.001791 | -2.469445 | 0.513172  |
| 1           | 0.346071  | 2.239673  | 1.244829  |
| 8           | 0.525217  | 3.171740  | 0.971774  |
| 1           | 1.258830  | 3.000927  | 0.365388  |
| 1           | -1.667707 | -2.255375 | -0.876146 |
| 8           | -1.915109 | -1.653369 | -1.603125 |
| 1           | -1.163295 | -1.016932 | -1.590709 |
| 1           | -1.068219 | 2.830328  | -0.311136 |
| 8           | -1.566037 | 2.371497  | -1.006081 |
| 1           | -0.971280 | 1.605074  | -1.191603 |
| 1           | -3.044971 | -0.395281 | -0.818094 |
| 8           | -3.496936 | 0.321630  | -0.324980 |
| 1           | -2.928109 | 1.099851  | -0.481123 |
| 1           | 3.815606  | -0.138215 | -0.317736 |
| 8           | 4.258316  | -1.005284 | -0.258682 |
| 1           | 3.458416  | -1.540748 | -0.131402 |

7.8.6-7

---

| <b>atom</b> | <b>x</b>  | <b>y</b>  | <b>z</b>  |
|-------------|-----------|-----------|-----------|
| 8           | -1.286616 | -0.663832 | -1.192236 |
| 16          | 0.056222  | -0.412425 | -0.607598 |
| 8           | -0.101544 | -0.072953 | 0.853019  |
| 8           | 0.676335  | 0.774394  | -1.285807 |
| 8           | 0.919351  | -1.597054 | -0.760870 |
| 1           | -3.029353 | 0.605381  | 1.056732  |
| 8           | -2.728061 | 0.070820  | 1.812922  |
| 1           | -1.784721 | -0.073414 | 1.584259  |
| 1           | 2.335989  | 1.225754  | -0.747603 |
| 8           | 3.199940  | 1.400892  | -0.309319 |
| 1           | 2.992501  | 1.209954  | 0.620694  |
| 1           | -2.495318 | -1.952795 | -0.413864 |
| 8           | -3.197463 | -2.319137 | 0.155566  |
| 1           | -3.212862 | -1.656395 | 0.865001  |
| 1           | -2.287171 | 2.115808  | -0.483258 |
| 8           | -2.998779 | 1.491796  | -0.712098 |
| 1           | -2.485921 | 0.706368  | -1.004572 |
| 1           | 2.638946  | -1.628918 | -0.396976 |
| 8           | 3.580906  | -1.486250 | -0.142164 |
| 1           | 3.702931  | -0.549511 | -0.370734 |
| 1           | 1.456029  | -0.048721 | 1.765750  |
| 8           | 2.371487  | -0.027515 | 2.126738  |
| 1           | 2.824969  | -0.700798 | 1.593334  |
| 1           | -0.539818 | 2.176471  | 0.864355  |
| 8           | -0.554551 | 2.793948  | 0.119926  |
| 1           | -0.063801 | 2.248739  | -0.536969 |

---

7.8.6-8

## 7.8.6-9

| <b>atom</b> | <b>x</b>  | <b>y</b>  | <b>z</b>  |
|-------------|-----------|-----------|-----------|
| 8           | 0.149295  | -1.211614 | 0.303635  |
| 16          | 0.148514  | -0.001471 | -0.572022 |
| 8           | 0.145479  | 1.227920  | 0.274647  |
| 8           | -1.068853 | -0.012781 | -1.431205 |
| 8           | 1.371753  | -0.010796 | -1.426845 |
| 1           | 4.065616  | 0.753557  | 0.695598  |
| 8           | 4.608660  | -0.005993 | 0.975151  |
| 1           | 4.062850  | -0.765672 | 0.701417  |
| 1           | 2.553020  | -1.359662 | -0.824579 |
| 8           | 2.825264  | -2.009887 | -0.146190 |
| 1           | 1.984506  | -2.023323 | 0.344478  |
| 1           | -2.451516 | 1.226355  | -1.000377 |
| 8           | -3.264277 | 1.573746  | -0.579575 |
| 1           | -2.990598 | 1.609213  | 0.358310  |
| 1           | -3.752432 | -0.368641 | -0.704657 |
| 8           | -3.459549 | -1.286296 | -0.842832 |
| 1           | -2.535516 | -1.115483 | -1.126139 |
| 1           | -2.754205 | -1.584608 | 0.967600  |
| 8           | -2.167215 | -1.562132 | 1.743700  |
| 1           | -1.280587 | -1.487005 | 1.318670  |
| 1           | 1.991479  | 2.022865  | 0.320337  |
| 8           | 2.834476  | 1.994763  | -0.165735 |
| 1           | 2.559762  | 1.337923  | -0.836688 |
| 1           | -1.202057 | 1.358457  | 1.446901  |
| 8           | -2.032581 | 1.311926  | 1.974542  |
| 1           | -2.166170 | 0.348710  | 2.057130  |



| <b>atom</b> | <b>x</b>  | <b>y</b>  | <b>z</b>  |
|-------------|-----------|-----------|-----------|
| 8           | 1.229940  | 1.013430  | -1.167510 |
| 16          | -0.056410 | 0.488400  | -0.632516 |
| 8           | -0.210254 | -0.949359 | -1.014748 |
| 8           | -1.189850 | 1.273841  | -1.153670 |
| 8           | -0.020554 | 0.582956  | 0.872614  |
| 1           | -3.399833 | 0.597827  | 0.777986  |
| 8           | -3.687142 | 0.890521  | -0.103129 |
| 1           | -2.826489 | 1.117527  | -0.527907 |
| 1           | 1.817981  | -2.291225 | 0.785552  |
| 8           | 1.666912  | -2.739946 | -0.063724 |
| 1           | 0.955188  | -2.185233 | -0.456535 |
| 1           | -2.437554 | -1.232209 | 1.369700  |
| 8           | -2.290207 | -0.537855 | 2.032745  |
| 1           | -1.458074 | -0.119458 | 1.715471  |
| 1           | 2.863212  | -0.452504 | 1.182766  |
| 8           | 2.253785  | -0.677724 | 1.904016  |
| 1           | 1.426673  | -0.221122 | 1.632543  |
| 1           | 1.689075  | 2.569927  | -0.070319 |
| 8           | 1.647936  | 3.087966  | 0.754297  |
| 1           | 1.035117  | 2.524564  | 1.246873  |
| 1           | 2.725556  | 0.040360  | -1.005957 |
| 8           | 3.471794  | -0.569616 | -0.808963 |
| 1           | 3.022822  | -1.430199 | -0.754155 |
| 1           | -1.870910 | -1.633053 | -0.778514 |
| 8           | -2.794315 | -1.882344 | -0.549886 |
| 1           | -3.264557 | -1.034556 | -0.613577 |

7.8.6-10

---

| <b>atom</b> | <b>x</b>  | <b>y</b>  | <b>z</b>  |
|-------------|-----------|-----------|-----------|
| 8           | 0.002743  | -1.015224 | 0.952961  |
| 16          | -0.695177 | -0.366208 | -0.199875 |
| 8           | -1.965547 | -1.069388 | -0.489742 |
| 8           | 0.195540  | -0.419895 | -1.399766 |
| 8           | -0.980390 | 1.063112  | 0.141674  |
| 1           | -4.335230 | 0.057027  | 0.777439  |
| 8           | -4.286256 | -0.865657 | 1.062157  |
| 1           | -3.421899 | -1.117746 | 0.674784  |
| 1           | 3.056312  | 0.594809  | -1.020932 |
| 8           | 2.480415  | 1.120606  | -1.605093 |
| 1           | 1.633186  | 0.618774  | -1.591429 |
| 1           | 1.738286  | 2.342381  | -0.324531 |
| 8           | 1.213502  | 2.715188  | 0.409089  |
| 1           | 0.368374  | 2.216790  | 0.328794  |
| 1           | 1.235694  | -0.019299 | 1.796839  |
| 8           | 1.975302  | 0.547815  | 2.114829  |
| 1           | 1.789057  | 1.396356  | 1.668398  |
| 1           | 1.436871  | -1.918443 | -1.163095 |
| 8           | 1.856634  | -2.493696 | -0.495578 |
| 1           | 1.271824  | -2.247859 | 0.250038  |
| 1           | 3.269652  | -0.175725 | 1.027795  |
| 8           | 3.820965  | -0.593928 | 0.330755  |
| 1           | 3.257156  | -1.331549 | 0.023816  |
| 1           | -2.667178 | 1.527533  | -0.359829 |
| 8           | -3.568282 | 1.432160  | -0.742636 |
| 1           | -3.466285 | 0.547534  | -1.119289 |

---

7.8.6-11

| <b>atom</b> | <b>x</b>  | <b>y</b>  | <b>z</b>  |
|-------------|-----------|-----------|-----------|
| 8           | -1.829257 | 0.924560  | -0.027371 |
| 16          | -0.884982 | -0.221058 | 0.093990  |
| 8           | -0.022761 | -0.030567 | 1.300501  |
| 8           | -0.007177 | -0.274140 | -1.117315 |
| 8           | -1.638432 | -1.497069 | 0.212569  |
| 1           | -3.763507 | 0.271371  | 0.016238  |
| 8           | -4.314041 | -0.525603 | 0.089654  |
| 1           | -3.587380 | -1.169943 | 0.159454  |
| 1           | 0.500274  | -2.195561 | -1.369792 |
| 8           | 0.336238  | -3.080921 | -0.997955 |
| 1           | -0.469935 | -2.859263 | -0.491949 |
| 1           | 1.563979  | -2.525625 | 0.482895  |
| 8           | 1.998475  | -1.998396 | 1.174930  |
| 1           | 1.346864  | -1.279016 | 1.320482  |
| 1           | 0.236539  | 2.792517  | -1.289784 |
| 8           | -0.560833 | 3.189252  | -0.911796 |
| 1           | -1.095291 | 2.400194  | -0.653204 |
| 1           | 3.404235  | -1.075640 | 0.251752  |
| 8           | 4.034952  | -0.533824 | -0.259975 |
| 1           | 3.475917  | 0.187201  | -0.596006 |
| 1           | 0.385361  | 2.970723  | 0.882428  |
| 8           | 0.989666  | 2.529809  | 1.501241  |
| 1           | 0.613675  | 1.621338  | 1.556470  |
| 1           | 1.933113  | 1.857228  | -0.129953 |
| 8           | 2.047293  | 1.511972  | -1.032806 |
| 1           | 1.342891  | 0.820829  | -1.096288 |

7.8.6-12

## 7.8.6-13

| <b>atom</b> | <b>x</b>  | <b>y</b>  | <b>z</b>  |
|-------------|-----------|-----------|-----------|
| 8           | -2.132353 | 0.334592  | 0.261150  |
| 16          | -0.686459 | 0.405064  | -0.044471 |
| 8           | -0.371093 | -0.481752 | -1.209464 |
| 8           | 0.104055  | -0.065746 | 1.137811  |
| 8           | -0.291250 | 1.803836  | -0.372321 |
| 1           | 2.652624  | 1.762644  | 0.374177  |
| 8           | 2.449526  | 2.124093  | -0.505775 |
| 1           | 1.463977  | 2.095053  | -0.519662 |
| 1           | -2.991113 | 2.137571  | 0.078475  |
| 8           | -2.850559 | 3.078484  | -0.124679 |
| 1           | -1.895107 | 3.025766  | -0.296377 |
| 1           | -0.464710 | -2.233186 | -0.960735 |
| 8           | -0.360069 | -3.170433 | -0.675268 |
| 1           | 0.449099  | -3.112037 | -0.147530 |
| 1           | -2.108739 | -2.827922 | 0.323651  |
| 8           | -2.922077 | -2.426368 | 0.667664  |
| 1           | -2.734835 | -1.471618 | 0.585940  |
| 1           | 2.843646  | -0.150380 | 1.734343  |
| 8           | 2.547764  | 0.720102  | 2.037678  |
| 1           | 1.585744  | 0.650482  | 1.835346  |
| 1           | 2.331314  | -1.536466 | -0.232697 |
| 8           | 2.082642  | -1.905918 | 0.636994  |
| 1           | 1.296832  | -1.356092 | 0.862706  |
| 1           | 1.347753  | -0.471820 | -1.742565 |
| 8           | 2.328317  | -0.440841 | -1.818569 |
| 1           | 2.527632  | 0.446604  | -1.465297 |

---

| <b>atom</b> | <b>x</b>  | <b>y</b>  | <b>z</b>  |
|-------------|-----------|-----------|-----------|
| 16          | -0.088523 | -0.233445 | -0.717124 |
| 8           | 1.245803  | -0.524170 | -1.309039 |
| 8           | -0.208768 | -0.992687 | 0.582371  |
| 8           | -0.197977 | 1.226387  | -0.422083 |
| 8           | -1.165312 | -0.652505 | -1.634234 |
| 8           | 2.296882  | -2.605566 | 0.120003  |
| 8           | 3.401418  | 1.361381  | -1.311306 |
| 8           | 1.946102  | -0.503712 | 2.232385  |
| 8           | -2.583884 | -0.440883 | 1.916189  |
| 8           | -2.795208 | 1.963599  | 0.235623  |
| 8           | 1.965497  | 2.172089  | 1.088024  |
| 8           | -3.756262 | -0.653548 | -0.756435 |
| 1           | 2.091029  | -1.880577 | -0.514908 |
| 1           | 1.430606  | -2.685105 | 0.539039  |
| 1           | 2.689451  | 0.711515  | -1.460179 |
| 1           | 3.093396  | 1.781929  | -0.490302 |
| 1           | 1.079806  | -0.584101 | 1.770453  |
| 1           | 2.494931  | -1.065519 | 1.666566  |
| 1           | -1.726334 | -0.704122 | 1.511312  |
| 1           | -2.662467 | 0.487501  | 1.639852  |
| 1           | -1.855113 | 1.803865  | -0.008723 |
| 1           | -3.264063 | 1.277903  | -0.267474 |
| 1           | 1.173478  | 1.955613  | 0.549791  |
| 1           | 2.102643  | 1.344478  | 1.581515  |
| 1           | -2.856327 | -0.701716 | -1.157621 |
| 1           | -3.561001 | -0.809624 | 0.182687  |

---

## 7.8.6-15

| atom | x         | y         | z         |
|------|-----------|-----------|-----------|
| 8    | -1.244360 | -1.593559 | -1.007161 |
| 16   | -0.089361 | -0.774000 | -0.627009 |
| 8    | -0.031869 | 0.479634  | -1.439605 |
| 8    | 1.175533  | -1.543633 | -0.813892 |
| 8    | -0.191927 | -0.375787 | 0.832456  |
| 1    | -0.794224 | 2.756754  | 0.265730  |
| 8    | -1.503004 | 2.630470  | -0.391142 |
| 1    | -1.142151 | 1.874108  | -0.900937 |
| 1    | -3.066201 | -1.463861 | -0.589645 |
| 8    | -3.957214 | -1.269692 | -0.239551 |
| 1    | -3.753975 | -0.543479 | 0.374438  |
| 1    | -2.523348 | 1.491930  | 0.825817  |
| 8    | -2.723562 | 0.756337  | 1.433080  |
| 1    | -1.905876 | 0.224809  | 1.351477  |
| 1    | 2.698881  | -0.885624 | -0.472469 |
| 8    | 3.525813  | -0.515743 | -0.064875 |
| 1    | 3.314757  | -0.619206 | 0.872722  |
| 1    | 1.400453  | 2.292928  | 0.605711  |
| 8    | 0.764058  | 2.253426  | 1.344368  |
| 1    | 0.435869  | 1.332545  | 1.279201  |
| 1    | 1.846834  | -2.302771 | 1.181711  |
| 8    | 1.802707  | -1.874115 | 2.047480  |
| 1    | 1.053768  | -1.267103 | 1.862546  |
| 1    | 1.498611  | 1.436870  | -1.295649 |
| 8    | 2.319251  | 1.911040  | -1.029864 |
| 1    | 2.882972  | 1.189079  | -0.698846 |

| <b>atom</b> | <b>x</b>  | <b>y</b>  | <b>z</b>  |
|-------------|-----------|-----------|-----------|
| 8           | 0.253016  | 0.302292  | -1.607097 |
| 16          | 1.016005  | -0.473810 | -0.580408 |
| 8           | 2.349651  | -0.827999 | -1.095693 |
| 8           | 0.246758  | -1.699628 | -0.221801 |
| 8           | 1.166729  | 0.383380  | 0.654438  |
| 1           | -2.202972 | -2.190927 | 1.049726  |
| 8           | -1.566639 | -2.210391 | 1.785315  |
| 1           | -0.735498 | -2.082365 | 1.278499  |
| 1           | -1.496382 | 0.543887  | -1.607530 |
| 8           | -2.462801 | 0.719942  | -1.531701 |
| 1           | -2.515863 | 1.298338  | -0.748874 |
| 1           | 3.718698  | -0.365287 | 0.116503  |
| 8           | 4.066339  | 0.035410  | 0.938415  |
| 1           | 3.220312  | 0.352943  | 1.287136  |
| 1           | -1.331888 | -0.366095 | 2.300508  |
| 8           | -0.956475 | 0.528674  | 2.384350  |
| 1           | -0.164755 | 0.479209  | 1.797308  |
| 1           | 0.858267  | 2.244219  | 0.167653  |
| 8           | 0.431497  | 2.845873  | -0.471894 |
| 1           | 0.292724  | 2.183442  | -1.176373 |
| 1           | -2.670418 | -1.105571 | -1.135091 |
| 8           | -2.462576 | -2.040725 | -0.941825 |
| 1           | -1.485574 | -2.012288 | -0.878475 |
| 1           | -1.303574 | 2.742749  | 0.321742  |
| 8           | -2.140094 | 2.472281  | 0.748720  |
| 1           | -1.842399 | 1.785839  | 1.383989  |

7.8.6-16

| <b>atom</b> | <b>x</b>  | <b>y</b>  | <b>z</b>  |
|-------------|-----------|-----------|-----------|
| 8           | -0.154034 | -2.341062 | -0.683295 |
| 16          | 0.425343  | -0.992540 | -0.504131 |
| 8           | -0.227972 | -0.022100 | -1.431397 |
| 8           | 1.892730  | -1.024943 | -0.762883 |
| 8           | 0.184630  | -0.533268 | 0.912070  |
| 1           | 3.201233  | 1.128523  | 0.640293  |
| 8           | 3.277681  | 1.248724  | -0.316074 |
| 1           | 2.796593  | 0.443339  | -0.632779 |
| 1           | 1.750248  | -0.493639 | 1.876867  |
| 8           | 2.714232  | -0.597411 | 2.033700  |
| 1           | 2.939956  | -1.036171 | 1.201714  |
| 1           | -0.096632 | 2.500532  | 0.465952  |
| 8           | -0.508677 | 2.160878  | 1.280749  |
| 1           | -0.320262 | 1.201105  | 1.211234  |
| 1           | -3.328143 | 1.385387  | 0.127848  |
| 8           | -3.336708 | 2.143567  | 0.740817  |
| 1           | -2.394084 | 2.229741  | 0.979349  |
| 1           | -2.080637 | -0.052315 | -1.233209 |
| 8           | -3.022514 | -0.163280 | -0.982993 |
| 1           | -2.976126 | -0.885205 | -0.333171 |
| 1           | -1.816113 | -1.532686 | 1.468636  |
| 8           | -2.295017 | -2.221311 | 0.987236  |
| 1           | -1.595093 | -2.462315 | 0.334413  |
| 1           | 1.730787  | 2.279525  | -0.929566 |
| 8           | 0.845826  | 2.538521  | -1.240337 |
| 1           | 0.421365  | 1.668308  | -1.412237 |

7.8.6-17



## 7.8.6-18

| atom | x         | y         | z         |
|------|-----------|-----------|-----------|
| 8    | -0.108270 | 1.047659  | -0.368774 |
| 16   | 0.286552  | -0.362626 | -0.701209 |
| 8    | 0.307087  | -1.152290 | 0.576833  |
| 8    | 1.642340  | -0.379691 | -1.304494 |
| 8    | -0.696308 | -0.947788 | -1.636822 |
| 1    | 2.728170  | 2.218118  | 0.329472  |
| 8    | 2.015699  | 2.875925  | 0.312976  |
| 1    | 1.243938  | 2.333268  | 0.061806  |
| 1    | -2.712576 | 1.816961  | 0.455657  |
| 8    | -2.784982 | 1.900231  | -0.512313 |
| 1    | -1.868713 | 1.660699  | -0.762430 |
| 1    | -2.742055 | -1.422745 | 0.789104  |
| 8    | -2.228016 | -1.553351 | 1.608651  |
| 1    | -1.299547 | -1.528739 | 1.282003  |
| 1    | -1.990757 | 0.270175  | 2.061256  |
| 8    | -1.738424 | 1.214782  | 2.055131  |
| 1    | -0.984047 | 1.214979  | 1.436953  |
| 1    | 3.679435  | -0.103660 | 0.753293  |
| 8    | 3.789478  | 0.534684  | 0.036057  |
| 1    | 3.020383  | 0.292835  | -0.539819 |
| 1    | 1.861708  | -1.821391 | 0.989515  |
| 8    | 2.794251  | -2.152579 | 1.003254  |
| 1    | 3.007240  | -2.078139 | 0.066711  |
| 1    | -3.371151 | 0.065535  | -0.844416 |
| 8    | -3.336880 | -0.899924 | -0.968957 |
| 1    | -2.404670 | -1.017140 | -1.272094 |

## 7.8.6-19

| atom | x         | y         | z         |
|------|-----------|-----------|-----------|
| 8    | 0.072360  | -0.895449 | -0.698137 |
| 16   | 0.080085  | 0.324087  | 0.172179  |
| 8    | 0.909090  | 1.379185  | -0.474533 |
| 8    | 0.613700  | -0.013851 | 1.507769  |
| 8    | -1.327589 | 0.824459  | 0.308280  |
| 1    | 2.585356  | 0.988254  | -0.941639 |
| 8    | 3.484098  | 0.629576  | -1.125534 |
| 1    | 3.296044  | -0.310657 | -1.284242 |
| 1    | -3.803650 | -0.431524 | 0.674424  |
| 8    | -3.373837 | -0.610663 | 1.524458  |
| 1    | -2.532799 | -0.123792 | 1.391207  |
| 1    | 1.645797  | -1.779045 | -0.806102 |
| 8    | 2.563378  | -2.133188 | -0.778907 |
| 1    | 2.856023  | -1.879365 | 0.112343  |
| 1    | 3.572944  | 0.014999  | 0.831014  |
| 8    | 3.309572  | -0.542387 | 1.581461  |
| 1    | 2.344789  | -0.349581 | 1.655648  |
| 1    | -3.068391 | -1.000373 | -1.356679 |
| 8    | -3.405548 | -0.088033 | -1.380398 |
| 1    | -2.651847 | 0.397759  | -0.987425 |
| 1    | -1.278206 | -2.013141 | -0.549042 |
| 8    | -2.121468 | -2.518731 | -0.455595 |
| 1    | -2.485870 | -2.169509 | 0.371325  |
| 1    | 0.014658  | 3.115206  | -0.400729 |
| 8    | -0.777087 | 3.648112  | -0.203244 |
| 1    | -1.349560 | 2.923133  | 0.090071  |

## 7.8.6-20

| atom | x         | y         | z         |
|------|-----------|-----------|-----------|
| 8    | -1.681377 | 0.177997  | -0.762050 |
| 16   | -0.886767 | -0.698458 | 0.165561  |
| 8    | 0.394567  | -1.070035 | -0.508152 |
| 8    | -1.661714 | -1.898080 | 0.512907  |
| 8    | -0.564972 | 0.097219  | 1.398335  |
| 1    | 1.201719  | 1.795077  | -1.262025 |
| 8    | 1.900094  | 1.129109  | -1.127979 |
| 1    | 1.378984  | 0.302305  | -0.980197 |
| 1    | -3.380585 | -1.929834 | -0.412726 |
| 8    | -3.999044 | -1.500438 | -1.032528 |
| 1    | -3.444266 | -0.729331 | -1.235575 |
| 1    | 3.693290  | 0.251384  | -1.383215 |
| 8    | 4.377720  | -0.414264 | -1.214980 |
| 1    | 3.941476  | -0.979599 | -0.548282 |
| 1    | 2.197364  | 1.140864  | 0.854096  |
| 8    | 2.059342  | 0.857150  | 1.773955  |
| 1    | 1.116847  | 0.574035  | 1.747536  |
| 1    | -1.405509 | 1.631217  | 1.479869  |
| 8    | -1.977744 | 2.417251  | 1.298042  |
| 1    | -2.544251 | 2.040369  | 0.614687  |
| 1    | -0.770454 | 2.896457  | -0.418257 |
| 8    | -0.560077 | 2.585054  | -1.311185 |
| 1    | -0.946164 | 1.674324  | -1.269455 |
| 1    | 2.701441  | -0.921926 | 1.320113  |
| 8    | 2.780125  | -1.735669 | 0.787835  |
| 1    | 1.913028  | -1.732367 | 0.330851  |

---

| <b>atom</b> | <b>x</b>  | <b>y</b>  | <b>z</b>  |
|-------------|-----------|-----------|-----------|
| 8           | 1.501750  | -1.860822 | -0.801865 |
| 16          | 0.585050  | -0.784649 | -0.394428 |
| 8           | -0.231161 | -0.314362 | -1.554995 |
| 8           | -0.332221 | -1.257263 | 0.686626  |
| 8           | 1.369980  | 0.387098  | 0.132569  |
| 1           | 0.358567  | 1.704879  | 0.646817  |
| 8           | -0.258170 | 2.401063  | 0.987254  |
| 1           | 1.951844  | 0.760293  | 1.971709  |
| 8           | 1.992961  | 1.349018  | 2.748311  |
| 1           | 1.243854  | 1.931350  | 2.566425  |
| 1           | -1.053606 | 1.883981  | 1.211795  |
| 1           | -0.592874 | 2.677378  | -0.940411 |
| 8           | -0.718391 | 2.439462  | -1.875733 |
| 1           | -0.361253 | 1.525639  | -1.893007 |
| 1           | -1.600417 | -0.160160 | 1.164362  |
| 8           | -2.381524 | 0.433594  | 1.287706  |
| 1           | -2.711822 | 0.524448  | 0.374008  |
| 1           | -2.432127 | 1.387151  | -1.718730 |
| 8           | -2.849641 | 0.527989  | -1.537336 |
| 1           | -2.049146 | -0.042333 | -1.545790 |
| 1           | 3.254374  | -1.252431 | -0.938637 |
| 8           | 4.010698  | -0.635275 | -0.858917 |
| 1           | 3.536360  | 0.113794  | -0.474337 |
| 1           | -1.730240 | -2.469184 | 0.935240  |
| 8           | -2.622981 | -2.739559 | 1.231112  |
| 1           | -3.024693 | -1.877965 | 1.393559  |

---

7.8.6-21

| <b>atom</b> | <b>x</b>  | <b>y</b>  | <b>z</b>  |
|-------------|-----------|-----------|-----------|
| 8           | -0.008490 | -0.006363 | -1.494146 |
| 16          | 0.883698  | -0.007121 | -0.291564 |
| 8           | 0.941508  | -1.379270 | 0.278292  |
| 8           | 0.309725  | 0.938324  | 0.726028  |
| 8           | 2.244011  | 0.445662  | -0.671660 |
| 1           | -2.962639 | 1.360002  | -0.652627 |
| 8           | -3.627569 | 0.706567  | -0.356972 |
| 1           | -3.266438 | -0.140195 | -0.698149 |
| 1           | -0.964800 | 1.534553  | -1.531471 |
| 8           | -1.411158 | 2.315726  | -1.133136 |
| 1           | -0.936666 | 2.310452  | -0.286631 |
| 1           | -0.496269 | -2.118576 | 1.020961  |
| 8           | -1.377381 | -2.388979 | 1.366997  |
| 1           | -1.704074 | -1.556116 | 1.756912  |
| 1           | -2.682993 | 0.473444  | 1.330666  |
| 8           | -2.048451 | 0.311490  | 2.052477  |
| 1           | -1.180177 | 0.529481  | 1.644973  |
| 1           | 3.522189  | -1.053851 | -0.564505 |
| 8           | 3.700449  | -1.980503 | -0.323870 |
| 1           | 2.811313  | -2.195810 | 0.001387  |
| 1           | -1.446534 | -1.097336 | -1.412531 |
| 8           | -2.273152 | -1.599035 | -1.231158 |
| 1           | -2.073703 | -2.020188 | -0.372570 |
| 1           | 1.739986  | 2.306945  | 1.335124  |
| 8           | 2.635390  | 2.613364  | 1.121532  |
| 1           | 2.822568  | 1.965285  | 0.418417  |

7.9.5-1

| <b>atom</b> | <b>x</b>  | <b>y</b>  | <b>z</b>  |
|-------------|-----------|-----------|-----------|
| 8           | -2.375258 | -0.059251 | -0.453662 |
| 16          | -0.891788 | -0.041157 | -0.494872 |
| 8           | -0.400847 | -0.130797 | -1.882455 |
| 8           | -0.361328 | -1.194597 | 0.313010  |
| 8           | -0.398106 | 1.238111  | 0.134110  |
| 1           | 2.382496  | 1.147293  | -1.254634 |
| 8           | 2.236817  | 1.830637  | -0.571573 |
| 1           | 1.283220  | 1.716228  | -0.361292 |
| 1           | -1.991196 | 2.612675  | 0.261021  |
| 8           | -2.956177 | 2.639828  | 0.172004  |
| 1           | -3.085861 | 1.704964  | -0.073516 |
| 1           | 1.309120  | -0.344578 | -2.266893 |
| 8           | 2.289120  | -0.440698 | -2.307300 |
| 1           | 2.460720  | -1.039678 | -1.556428 |
| 1           | 1.358464  | -1.721631 | 0.169702  |
| 8           | 2.324365  | -1.905180 | 0.157244  |
| 1           | 2.692115  | -1.199665 | 0.720453  |
| 1           | 0.080089  | 0.899624  | 1.927364  |
| 8           | 0.380115  | 0.271183  | 2.615679  |
| 1           | 0.142689  | -0.545016 | 2.140933  |
| 1           | -3.035827 | -1.750828 | 0.232117  |
| 8           | -2.876894 | -2.627228 | 0.629050  |
| 1           | -1.911842 | -2.560713 | 0.695126  |
| 1           | 2.888420  | 0.980599  | 0.930263  |
| 8           | 3.074856  | 0.425803  | 1.718291  |
| 1           | 2.202697  | 0.376747  | 2.158564  |

7.9.5-2

## 7.9.5-3

| <b>atom</b> | <b>x</b>  | <b>y</b>  | <b>z</b>  |
|-------------|-----------|-----------|-----------|
| 8           | -1.724793 | 1.223630  | -0.166794 |
| 16          | -0.509072 | 0.373219  | -0.069857 |
| 8           | -0.528815 | -0.373832 | 1.221874  |
| 8           | 0.714502  | 1.238125  | -0.121828 |
| 8           | -0.474406 | -0.592765 | -1.203568 |
| 1           | 2.439585  | -1.321311 | -1.414373 |
| 8           | 1.846875  | -2.090285 | -1.345270 |
| 1           | 0.961504  | -1.659345 | -1.341292 |
| 1           | -3.277454 | -1.665228 | -0.355693 |
| 8           | -2.971074 | -2.074070 | -1.180318 |
| 1           | -2.107904 | -1.636391 | -1.307671 |
| 1           | -2.490846 | -0.739386 | 1.596362  |
| 8           | -3.383944 | -0.476978 | 1.311491  |
| 1           | -3.120839 | 0.277783  | 0.748712  |
| 1           | 0.172323  | 3.270157  | -0.302600 |
| 8           | -0.624128 | 3.818662  | -0.367705 |
| 1           | -1.278444 | 3.096843  | -0.320452 |
| 1           | 3.403838  | 0.435930  | -0.306518 |
| 8           | 3.157188  | 0.495428  | -1.246510 |
| 1           | 2.232936  | 0.805611  | -1.149753 |
| 1           | 2.574734  | -0.455194 | 1.708447  |
| 8           | 2.862876  | 0.474542  | 1.609030  |
| 1           | 2.065031  | 0.880802  | 1.217075  |
| 1           | 0.795961  | -1.544241 | 1.494535  |
| 8           | 1.624263  | -2.076112 | 1.523870  |
| 1           | 1.786366  | -2.248268 | 0.576743  |

## 7.9.5-4

| <b>atom</b> | <b>x</b>  | <b>y</b>  | <b>z</b>  |
|-------------|-----------|-----------|-----------|
| 8           | -1.211982 | 1.393602  | 0.002240  |
| 16          | -0.105777 | 0.399714  | -0.002661 |
| 8           | -0.196377 | -0.452830 | -1.222012 |
| 8           | -0.191298 | -0.458255 | 1.213201  |
| 8           | 1.210486  | 1.120564  | -0.003939 |
| 1           | -1.580313 | -1.581388 | -1.325135 |
| 8           | -2.397407 | -2.126382 | -1.252739 |
| 1           | -2.477251 | -2.249348 | -0.292421 |
| 1           | 2.360991  | 0.339387  | -1.369233 |
| 8           | 2.509397  | -0.391747 | -1.997301 |
| 1           | 1.599939  | -0.741693 | -1.990542 |
| 1           | -3.213990 | -0.876730 | 1.198795  |
| 8           | -2.688770 | -1.571857 | 1.628468  |
| 1           | -1.775691 | -1.207003 | 1.575374  |
| 1           | 2.362363  | 0.346096  | 1.366484  |
| 8           | 2.509528  | -0.383535 | 1.996468  |
| 1           | 1.600067  | -0.733768 | 1.988260  |
| 1           | 0.926777  | 3.128509  | -0.000179 |
| 8           | 0.266759  | 3.841272  | 0.002068  |
| 1           | -0.525085 | 3.276882  | 0.002056  |
| 1           | -2.880060 | 0.804160  | -0.246797 |
| 8           | -3.735511 | 0.331433  | -0.365777 |
| 1           | -3.469669 | -0.439614 | -0.894365 |
| 1           | 3.616109  | -1.406145 | 0.761097  |
| 8           | 4.116697  | -1.757843 | 0.002664  |
| 1           | 3.616059  | -1.410149 | -0.757552 |



## 7.9.5-5

| <b>atom</b> | <b>x</b>  | <b>y</b>  | <b>z</b>  |
|-------------|-----------|-----------|-----------|
| 8           | -0.603276 | 1.206447  | -0.951992 |
| 16          | 0.243366  | 0.066561  | -0.514410 |
| 8           | -0.287505 | -1.208662 | -1.073253 |
| 8           | 0.237354  | -0.006881 | 0.985865  |
| 8           | 1.646895  | 0.262659  | -0.975557 |
| 1           | 0.084962  | 2.963837  | -0.552979 |
| 8           | 0.576798  | 3.745931  | -0.238773 |
| 1           | 1.294234  | 3.328834  | 0.264873  |
| 1           | 2.126812  | -2.508121 | 0.816431  |
| 8           | 1.888129  | -2.289062 | 1.730576  |
| 1           | 1.301326  | -1.520308 | 1.604470  |
| 1           | 2.407744  | -1.518742 | -1.201377 |
| 8           | 2.240822  | -2.480007 | -1.230811 |
| 1           | 1.268077  | -2.438104 | -1.267432 |
| 1           | 2.443487  | 1.412436  | 0.252754  |
| 8           | 2.481262  | 1.921595  | 1.089753  |
| 1           | 1.771467  | 1.462775  | 1.563799  |
| 1           | -1.875388 | -1.802617 | -0.512835 |
| 8           | -2.763723 | -1.986415 | -0.130751 |
| 1           | -2.685498 | -1.596945 | 0.756250  |
| 1           | -2.776428 | 0.483135  | 1.328324  |
| 8           | -2.346549 | -0.039869 | 2.024573  |
| 1           | -1.401336 | -0.017258 | 1.753713  |
| 1           | -2.393442 | 1.058902  | -0.799683 |
| 8           | -3.335537 | 0.843597  | -0.618732 |
| 1           | -3.337230 | -0.127472 | -0.662928 |

## 7.9.5-6

| <b>atom</b> | <b>x</b>  | <b>y</b>  | <b>z</b>  |
|-------------|-----------|-----------|-----------|
| 8           | 0.018908  | 0.032313  | 1.061497  |
| 16          | 0.656834  | -0.449068 | -0.208098 |
| 8           | 2.134015  | -0.243404 | -0.112109 |
| 8           | 0.124432  | 0.351152  | -1.349198 |
| 8           | 0.360151  | -1.888399 | -0.407691 |
| 1           | -0.695232 | 2.866198  | 0.314458  |
| 8           | -1.313864 | 2.450041  | 0.940591  |
| 1           | -0.908871 | 1.560637  | 1.053445  |
| 1           | -3.346677 | -1.609951 | 0.454996  |
| 8           | -4.073648 | -1.203926 | -0.050727 |
| 1           | -3.633161 | -0.457281 | -0.498868 |
| 1           | -1.374655 | -1.321329 | 1.632069  |
| 8           | -1.747732 | -2.187134 | 1.392998  |
| 1           | -1.120039 | -2.398182 | 0.674278  |
| 1           | 2.061570  | -2.967510 | -0.526120 |
| 8           | 3.032599  | -2.929059 | -0.496897 |
| 1           | 3.111721  | -1.971059 | -0.348410 |
| 1           | 0.612115  | 2.117778  | -1.219232 |
| 8           | 0.838167  | 3.027546  | -0.923480 |
| 1           | 1.490320  | 2.859399  | -0.221558 |
| 1           | -2.426581 | 1.576526  | -0.477949 |
| 8           | -2.601785 | 0.983249  | -1.228269 |
| 1           | -1.703895 | 0.625786  | -1.394144 |
| 1           | 2.462662  | 1.181052  | 0.802730  |
| 8           | 2.402942  | 2.015373  | 1.334693  |
| 1           | 1.567891  | 1.860992  | 1.792604  |

---

| <b>atom</b> | <b>x</b>  | <b>y</b>  | <b>z</b>  |
|-------------|-----------|-----------|-----------|
| 16          | 0.297828  | 0.014726  | -0.485851 |
| 8           | 0.165474  | -0.029450 | 1.010679  |
| 8           | 1.733048  | 0.101663  | -0.851227 |
| 8           | -0.302004 | -1.230570 | -1.047825 |
| 8           | -0.419914 | 1.210016  | -1.010397 |
| 8           | 3.258438  | -2.242349 | -0.238213 |
| 8           | 0.653376  | -2.932468 | 0.972898  |
| 8           | -2.489552 | -0.392797 | 1.792441  |
| 8           | -3.063972 | 1.538729  | -0.323678 |
| 8           | 1.424404  | 2.366378  | 2.076021  |
| 8           | 1.863093  | 2.911239  | -0.830822 |
| 8           | -3.073425 | -1.317099 | -0.964406 |
| 1           | 2.849907  | -1.397684 | -0.510531 |
| 1           | 2.517985  | -2.664241 | 0.225895  |
| 1           | 0.261156  | -2.624056 | 0.131671  |
| 1           | 0.627651  | -2.092167 | 1.456883  |
| 1           | -1.533715 | -0.247351 | 1.613118  |
| 1           | -2.758350 | -0.955369 | 1.048117  |
| 1           | -2.124002 | 1.514432  | -0.616533 |
| 1           | -3.005868 | 1.128741  | 0.555647  |
| 1           | 0.985142  | 1.526975  | 1.843227  |
| 1           | 1.657634  | 2.715750  | 1.201860  |
| 1           | 2.189723  | 1.991849  | -0.867621 |
| 1           | 0.917101  | 2.717006  | -0.954238 |
| 1           | -2.095970 | -1.355533 | -1.066684 |
| 1           | -3.245368 | -0.360291 | -0.970957 |

---

7.9.5-7

| <b>atom</b> | <b>x</b>  | <b>y</b>  | <b>z</b>  |
|-------------|-----------|-----------|-----------|
| 8           | 0.980214  | 1.555614  | -0.503692 |
| 16          | -0.099291 | 0.569474  | -0.237611 |
| 8           | -1.348038 | 1.280260  | 0.145065  |
| 8           | 0.324985  | -0.333049 | 0.893071  |
| 8           | -0.334945 | -0.268515 | -1.446616 |
| 1           | -2.073508 | -2.410017 | -0.177288 |
| 8           | -2.299356 | -2.189586 | -1.095369 |
| 1           | -1.611355 | -1.521316 | -1.319621 |
| 1           | 3.984292  | -0.500400 | 0.336111  |
| 8           | 4.315250  | -1.277900 | -0.150293 |
| 1           | 3.489169  | -1.672262 | -0.483796 |
| 1           | -3.486920 | -0.798951 | -0.283124 |
| 8           | -3.703937 | -0.109172 | 0.367133  |
| 1           | -2.917633 | 0.480012  | 0.298269  |
| 1           | 1.302677  | -1.796466 | 0.055939  |
| 8           | 1.648471  | -2.233713 | -0.744995 |
| 1           | 1.140297  | -1.728572 | -1.400952 |
| 1           | 2.443730  | 1.273802  | 0.555643  |
| 8           | 2.946241  | 0.836408  | 1.276604  |
| 1           | 2.232099  | 0.262844  | 1.595452  |
| 1           | -1.140255 | 3.292311  | -0.081908 |
| 8           | -0.508466 | 3.993936  | -0.310466 |
| 1           | 0.261584  | 3.420725  | -0.467358 |
| 1           | -2.552034 | -1.249159 | 1.599496  |
| 8           | -1.827216 | -1.857599 | 1.819258  |
| 1           | -1.029108 | -1.337606 | 1.577334  |

7.9.5-8

## 7.9.5-9

| <b>atom</b> | <b>x</b>  | <b>y</b>  | <b>z</b>  |
|-------------|-----------|-----------|-----------|
| 8           | -0.106408 | 0.267977  | -1.416715 |
| 16          | 0.874551  | 0.035953  | -0.321979 |
| 8           | 1.034988  | -1.431806 | -0.112270 |
| 8           | 0.352119  | 0.655973  | 0.947233  |
| 8           | 2.181916  | 0.648463  | -0.664968 |
| 1           | -1.295571 | 1.266645  | 1.022267  |
| 8           | -2.247148 | 1.525950  | 1.047812  |
| 1           | -2.442199 | 1.706119  | 0.111104  |
| 1           | 0.082372  | -1.977210 | 1.332322  |
| 8           | -0.409452 | -1.810861 | 2.167450  |
| 1           | -0.227882 | -0.857513 | 2.218928  |
| 1           | -1.592326 | -0.911243 | -1.530229 |
| 8           | -2.523973 | -1.210968 | -1.558385 |
| 1           | -2.755510 | -1.310980 | -0.615459 |
| 1           | 2.688589  | 2.016991  | 0.597763  |
| 8           | 2.517087  | 2.552270  | 1.395011  |
| 1           | 1.664434  | 2.154696  | 1.628875  |
| 1           | -2.874134 | -0.208918 | 1.246966  |
| 8           | -3.038004 | -1.175432 | 1.273885  |
| 1           | -2.183683 | -1.529548 | 1.593647  |
| 1           | -2.801307 | 0.747292  | -1.861064 |
| 8           | -2.439060 | 1.650835  | -1.835055 |
| 1           | -1.486343 | 1.437264  | -1.740760 |
| 1           | 3.566835  | -0.763106 | -0.936065 |
| 8           | 3.773701  | -1.713462 | -0.906864 |
| 1           | 2.897766  | -2.017258 | -0.613711 |

| <b>atom</b> | <b>x</b>  | <b>y</b>  | <b>z</b>  |
|-------------|-----------|-----------|-----------|
| 8           | 0.215135  | -0.746549 | 0.929569  |
| 16          | -0.554107 | 0.059739  | -0.074296 |
| 8           | -2.016571 | -0.132247 | 0.153362  |
| 8           | -0.196539 | -0.398901 | -1.444548 |
| 8           | -0.204864 | 1.496914  | 0.088008  |
| 1           | -1.792917 | -1.076548 | -2.445861 |
| 8           | -2.750726 | -1.240865 | -2.413185 |
| 1           | -2.900223 | -0.925598 | -1.506996 |
| 1           | -1.817059 | 2.614226  | 0.493497  |
| 8           | -2.778082 | 2.613726  | 0.641592  |
| 1           | -2.920126 | 1.659122  | 0.534929  |
| 1           | 2.703662  | 1.130005  | 1.155821  |
| 8           | 2.610248  | 0.499058  | 1.896789  |
| 1           | 1.692416  | 0.187025  | 1.772411  |
| 1           | 1.508007  | -0.343406 | -1.955587 |
| 8           | 2.488177  | -0.358692 | -2.051813 |
| 1           | 2.742578  | -0.959842 | -1.329161 |
| 1           | -2.349650 | -1.359919 | 1.688729  |
| 8           | -1.980154 | -1.920898 | 2.391977  |
| 1           | -1.042297 | -1.762000 | 2.199594  |
| 1           | 1.475686  | 1.977112  | -0.313214 |
| 8           | 2.441985  | 2.054788  | -0.482970 |
| 1           | 2.599988  | 1.315174  | -1.100161 |
| 1           | 2.999623  | -1.185480 | 0.933750  |
| 8           | 2.700407  | -1.923067 | 0.372471  |
| 1           | 1.733891  | -1.771819 | 0.410956  |

7.10.4-1

| <b>atom</b> | <b>x</b>  | <b>y</b>  | <b>z</b>  |
|-------------|-----------|-----------|-----------|
| 16          | 0.333264  | 0.031438  | -0.086832 |
| 8           | 1.799525  | -0.081447 | -0.331021 |
| 8           | -0.111689 | 1.432662  | -0.295071 |
| 8           | -0.394430 | -0.884940 | -1.010610 |
| 8           | 0.036681  | -0.377081 | 1.328577  |
| 1           | 2.192398  | -1.482300 | -1.823445 |
| 8           | 1.756303  | -2.086538 | -2.443966 |
| 1           | 0.838008  | -1.883617 | -2.195967 |
| 1           | 2.546763  | 1.663640  | -0.986262 |
| 8           | 2.380155  | 2.592249  | -1.218999 |
| 1           | 1.432720  | 2.610010  | -1.011484 |
| 1           | 2.735732  | -0.863343 | 1.217863  |
| 8           | 2.716293  | -1.224269 | 2.121241  |
| 1           | 1.770070  | -1.102543 | 2.289524  |
| 1           | -1.874618 | 1.849924  | -0.896170 |
| 8           | -2.811493 | 1.940932  | -1.151660 |
| 1           | -3.128905 | 1.027844  | -1.071037 |
| 1           | -2.157482 | -0.901485 | -1.095930 |
| 8           | -3.123821 | -0.980555 | -0.920993 |
| 1           | -3.111808 | -1.280301 | -0.000769 |
| 1           | -1.223238 | -1.575210 | 1.498106  |
| 8           | -1.875664 | -2.314842 | 1.434430  |
| 1           | -1.578486 | -2.744733 | 0.626213  |
| 1           | -0.434580 | 1.143870  | 2.410313  |
| 8           | -0.701846 | 2.064874  | 2.582639  |
| 1           | -0.698898 | 2.386879  | 1.671824  |

7.11.2-1

| <b>atom</b> | <b>x</b>  | <b>y</b>  | <b>z</b>  |
|-------------|-----------|-----------|-----------|
| 8           | -2.681134 | 0.580449  | -2.568299 |
| 8           | -1.858833 | -0.448947 | -0.000025 |
| 16          | -0.431080 | -0.024264 | -0.000010 |
| 8           | -0.143073 | 0.787468  | -1.218746 |
| 8           | 0.447915  | -1.239747 | -0.000202 |
| 8           | -0.143001 | 0.787140  | 1.218927  |
| 8           | 0.177528  | 3.388405  | 0.000316  |
| 8           | -2.681086 | 0.580115  | 2.568403  |
| 8           | -1.530606 | -3.322046 | -0.000248 |
| 8           | 2.280313  | -0.495457 | -1.994988 |
| 8           | 2.280297  | -0.496040 | 1.994863  |
| 1           | -2.789096 | 0.118477  | -1.721282 |
| 1           | -1.751863 | 0.838638  | -2.455232 |
| 1           | 0.092401  | 2.755097  | 0.730825  |
| 1           | 0.092321  | 2.755103  | -0.730197 |
| 1           | -1.751783 | 0.838212  | 2.455383  |
| 1           | -2.789106 | 0.118323  | 1.721296  |
| 1           | -0.637583 | -2.940027 | -0.000299 |
| 1           | -2.025741 | -2.487247 | -0.000123 |
| 1           | 1.802328  | -1.064186 | -1.362500 |
| 1           | 1.644711  | 0.239980  | -2.004875 |
| 1           | 1.802363  | -1.064640 | 1.362227  |
| 1           | 1.644664  | 0.239373  | 2.004885  |
| 8           | 4.359215  | -0.081752 | 0.000006  |
| 1           | 3.751684  | -0.137895 | 0.759069  |
| 1           | 3.751690  | -0.137673 | -0.759078 |

7.12.2-1
