# Supplementary material for: Cryogenic ion trap vibrational spectroscopy of the microhydrated sulfate dianions SO42−(H2O)3−8
Source: Royal Society of Chemistry journal article supplement (doi:10.1039/d0cp04386a), 2020-01-01
Supplement: d0cp04386a7.pdf [file d0cp04386a7.pdf]

## Structures of $\text{SO}_4^{2-}(\text{H}_2\text{O})_8$

## 8.7.9-1

---

| <b>atom</b> | <b>x</b>  | <b>y</b>  | <b>z</b>  |
|-------------|-----------|-----------|-----------|
| 16          | -0.238271 | -1.097352 | 0.451994  |
| 8           | -0.103631 | -0.456341 | -0.903850 |
| 8           | 1.078813  | -1.654887 | 0.849176  |
| 8           | -0.653413 | -0.047353 | 1.433944  |
| 8           | -1.269102 | -2.153519 | 0.385093  |
| 8           | 0.781536  | 2.293095  | 1.676799  |
| 1           | 0.221455  | 1.486599  | 1.616809  |
| 1           | 0.740370  | 2.673144  | 0.780953  |
| 8           | 2.957637  | -2.314999 | -1.203518 |
| 1           | 2.272918  | -2.268245 | -0.508628 |
| 1           | 2.958123  | -1.405614 | -1.531671 |
| 8           | 2.911640  | 0.456432  | 1.342089  |
| 1           | 2.275002  | 1.162284  | 1.571561  |
| 1           | 2.346975  | -0.342026 | 1.289127  |
| 8           | -1.743524 | 1.600919  | -1.451045 |
| 1           | -2.283351 | 1.627340  | -0.641461 |
| 1           | -1.144412 | 0.831175  | -1.280273 |
| 8           | 0.698999  | 3.083486  | -1.127786 |
| 1           | 1.313712  | 2.350549  | -1.325327 |
| 1           | -0.185565 | 2.695263  | -1.275199 |
| 8           | -3.215977 | 0.904730  | 0.967114  |
| 1           | -2.333610 | 0.589480  | 1.266317  |
| 1           | -3.523322 | 0.160563  | 0.422343  |
| 8           | 2.307295  | 0.692747  | -1.426760 |
| 1           | 1.443142  | 0.232282  | -1.298365 |
| 1           | 2.682940  | 0.682502  | -0.523291 |
| 8           | -3.417344 | -1.237623 | -1.004166 |
| 1           | -2.659906 | -1.657708 | -0.521630 |
| 1           | -2.975576 | -0.593458 | -1.569910 |

---

## 8.7.9-2

---

| <b>atom</b> | <b>x</b>  | <b>y</b>  | <b>z</b>  |
|-------------|-----------|-----------|-----------|
| 16          | 0.378888  | -0.955866 | -0.447319 |
| 8           | 1.795007  | -1.143757 | -0.873939 |
| 8           | 0.365702  | -0.462182 | 0.967888  |
| 8           | -0.236375 | 0.105052  | -1.319048 |
| 8           | -0.384385 | -2.207349 | -0.562299 |
| 8           | -2.979088 | -2.000246 | 0.445667  |
| 1           | -2.791194 | -1.354764 | 1.155008  |
| 1           | -2.082459 | -2.191951 | 0.093026  |
| 8           | -0.000927 | 2.586665  | -0.324755 |
| 1           | -0.112669 | 1.669893  | -0.688545 |
| 1           | 0.585056  | 2.448810  | 0.433650  |
| 8           | 3.846498  | -1.206739 | 1.100632  |
| 1           | 3.554589  | -0.372072 | 1.490100  |
| 1           | 3.151400  | -1.360639 | 0.430826  |
| 8           | 2.763280  | 1.380199  | -1.447521 |
| 1           | 1.922263  | 1.841538  | -1.552354 |
| 1           | 2.484115  | 0.438478  | -1.358890 |
| 8           | -2.788519 | 2.253527  | 0.390444  |
| 1           | -1.864620 | 2.509079  | 0.212567  |
| 1           | -2.967256 | 1.563847  | -0.284481 |
| 8           | -2.067104 | 0.074008  | 2.181674  |
| 1           | -1.177773 | -0.117174 | 1.809111  |
| 1           | -2.358363 | 0.860268  | 1.685695  |
| 8           | 2.267460  | 1.447736  | 1.425711  |
| 1           | 1.589853  | 0.733972  | 1.351989  |
| 1           | 2.625496  | 1.501757  | 0.522259  |
| 8           | -3.007336 | 0.130497  | -1.452374 |
| 1           | -2.028840 | 0.093746  | -1.533958 |
| 1           | -3.185513 | -0.630222 | -0.865536 |

---

## 8.7.9-3

---

| <b>atom</b> | <b>x</b>  | <b>y</b>  | <b>z</b>  |
|-------------|-----------|-----------|-----------|
| 16          | -0.395001 | -0.982718 | -0.355194 |
| 8           | 0.220514  | 0.025508  | -1.285190 |
| 8           | -0.405142 | -0.399651 | 1.025726  |
| 8           | -1.804959 | -1.213952 | -0.784777 |
| 8           | 0.376729  | -2.234423 | -0.379192 |
| 8           | -2.733364 | 1.239145  | -1.593779 |
| 1           | -1.877094 | 1.649298  | -1.762011 |
| 1           | -2.481239 | 0.302782  | -1.407777 |
| 8           | 2.130317  | -0.131412 | 2.114389  |
| 1           | 2.583163  | -0.796294 | 1.561060  |
| 1           | 1.196550  | -0.216943 | 1.817809  |
| 8           | 2.703267  | 2.224613  | 0.703787  |
| 1           | 1.813031  | 2.475792  | 0.392904  |
| 1           | 2.537923  | 1.442765  | 1.275381  |
| 8           | 2.977005  | 0.388390  | -1.516476 |
| 1           | 2.015813  | 0.192734  | -1.545017 |
| 1           | 3.030991  | 1.073244  | -0.823954 |
| 8           | -2.284758 | 1.566922  | 1.268641  |
| 1           | -2.618840 | 1.546521  | 0.354298  |
| 1           | -1.615976 | 0.840314  | 1.274851  |
| 8           | 0.062353  | 2.578487  | -0.381352 |
| 1           | 0.151921  | 1.651033  | -0.713897 |
| 1           | -0.602252 | 2.491762  | 0.318379  |
| 8           | 3.094738  | -1.954380 | 0.115560  |
| 1           | 3.238391  | -1.203356 | -0.491356 |
| 1           | 2.148786  | -2.168587 | -0.044199 |
| 8           | -3.889364 | -1.091722 | 1.149743  |
| 1           | -3.597454 | -0.227878 | 1.469149  |
| 1           | -3.182370 | -1.309873 | 0.510843  |

---

## 8.7.9-4

---

| <b>atom</b> | <b>x</b>  | <b>y</b>  | <b>z</b>  |
|-------------|-----------|-----------|-----------|
| 16          | -0.236498 | -1.325933 | -0.084018 |
| 8           | -1.561278 | -1.951875 | -0.259371 |
| 8           | -0.134619 | -0.125047 | -1.008800 |
| 8           | -0.087729 | -0.817473 | 1.318148  |
| 8           | 0.850524  | -2.269221 | -0.401120 |
| 8           | 2.281120  | 0.521981  | 1.911362  |
| 1           | 1.426661  | 0.062921  | 1.748851  |
| 1           | 2.239651  | 1.317910  | 1.353376  |
| 8           | 2.430655  | 0.574777  | -1.815378 |
| 1           | 2.933807  | -0.070085 | -1.280293 |
| 1           | 1.504480  | 0.285323  | -1.659629 |
| 8           | -0.730097 | 2.320879  | -0.075744 |
| 1           | -1.448927 | 2.379058  | -0.724642 |
| 1           | -0.415248 | 1.398830  | -0.265405 |
| 8           | -2.566859 | 1.083310  | -1.957470 |
| 1           | -1.747946 | 0.558652  | -1.874300 |
| 1           | -3.122695 | 0.678763  | -1.261269 |
| 8           | -3.710377 | -0.316699 | 0.239674  |
| 1           | -3.014380 | -0.988287 | 0.046809  |
| 1           | -3.298047 | 0.186322  | 0.967324  |
| 8           | -2.004022 | 0.983855  | 2.147446  |
| 1           | -1.365818 | 0.250886  | 1.989058  |
| 1           | -1.656766 | 1.655902  | 1.536805  |
| 8           | 3.409215  | -1.336196 | 0.059736  |
| 1           | 2.543811  | -1.777082 | -0.100628 |
| 1           | 3.190992  | -0.717240 | 0.783321  |
| 8           | 2.138955  | 2.724757  | -0.048503 |
| 1           | 2.318458  | 2.034091  | -0.724613 |
| 1           | 1.172032  | 2.814568  | -0.070329 |

---

## 8.7.9-5

---

| <b>atom</b> | <b>x</b>  | <b>y</b>  | <b>z</b>  |
|-------------|-----------|-----------|-----------|
| 16          | 0.024287  | -1.152873 | -0.313150 |
| 8           | 0.277247  | 0.125106  | -1.063981 |
| 8           | -1.356843 | -1.614611 | -0.614678 |
| 8           | 1.017224  | -2.166987 | -0.714803 |
| 8           | 0.143465  | -0.872917 | 1.153726  |
| 8           | -3.165049 | 0.334059  | -1.623059 |
| 1           | -2.490294 | -0.365059 | -1.504348 |
| 1           | -2.698786 | 1.117818  | -1.280847 |
| 8           | -3.662457 | -1.079527 | 0.834829  |
| 1           | -2.816291 | -1.475640 | 0.537410  |
| 1           | -3.841110 | -0.497283 | 0.076358  |
| 8           | 3.629619  | -1.350541 | -0.724660 |
| 1           | 3.494119  | -0.404000 | -0.879460 |
| 1           | 2.711716  | -1.710444 | -0.780588 |
| 8           | 2.763147  | -0.375110 | 1.912363  |
| 1           | 3.206590  | -0.881635 | 1.212268  |
| 1           | 1.813034  | -0.574833 | 1.751331  |
| 8           | -1.843650 | 0.778194  | 2.124943  |
| 1           | -1.068290 | 0.225234  | 1.875076  |
| 1           | -2.587548 | 0.221908  | 1.834441  |
| 8           | 1.000800  | 3.940475  | -0.268041 |
| 1           | 0.139884  | 3.487554  | -0.247244 |
| 1           | 1.631051  | 3.199172  | -0.272288 |
| 8           | -1.349040 | 2.173454  | -0.306865 |
| 1           | -1.568170 | 1.867032  | 0.596211  |
| 1           | -0.734398 | 1.466478  | -0.622457 |
| 8           | 2.549870  | 1.444882  | -0.355067 |
| 1           | 1.730789  | 0.988363  | -0.668390 |
| 1           | 2.654442  | 1.089486  | 0.545265  |

---

| <b>atom</b> | <b>x</b>  | <b>y</b>  | <b>z</b>  |
|-------------|-----------|-----------|-----------|
| 8           | -0.098600 | 0.086002  | 1.138398  |
| 16          | -0.877340 | -0.419740 | -0.038285 |
| 8           | -2.283754 | 0.055846  | 0.081325  |
| 8           | -0.833514 | -1.900345 | -0.067214 |
| 8           | -0.274342 | 0.132149  | -1.288312 |
| 1           | 1.438776  | -0.197871 | -1.704634 |
| 8           | 2.386511  | -0.416024 | -1.843636 |
| 1           | 2.840518  | 0.078097  | -1.136572 |
| 1           | 2.089899  | -2.117898 | -1.067456 |
| 8           | 1.773232  | -2.858217 | -0.512729 |
| 1           | 0.826628  | -2.636789 | -0.383486 |
| 1           | -0.478755 | 1.890722  | -1.611135 |
| 8           | -0.570058 | 2.869080  | -1.568671 |
| 1           | -1.286739 | 2.978501  | -0.921543 |
| 1           | 2.214651  | -1.928870 | 1.102154  |
| 8           | 2.238713  | -1.250544 | 1.804383  |
| 1           | 1.365850  | -0.815590 | 1.688795  |
| 1           | 0.712262  | 2.768694  | -0.056223 |
| 8           | 1.066822  | 2.510642  | 0.812872  |
| 1           | 0.652776  | 1.625364  | 0.959084  |
| 1           | 3.144323  | 0.163841  | 1.010365  |
| 8           | 3.468838  | 0.929863  | 0.491119  |
| 1           | 2.747696  | 1.582151  | 0.574114  |
| 1           | -3.554200 | -1.493999 | 0.153783  |
| 8           | -3.654969 | -2.460972 | 0.144321  |
| 1           | -2.713395 | -2.686523 | 0.067849  |
| 8           | -2.246803 | 2.686140  | 0.818288  |
| 1           | -2.348669 | 1.728044  | 0.593838  |
| 1           | -1.390790 | 2.709001  | 1.262475  |

8.8.8-1

## 8.8.8-2

---

| <b>atom</b> | <b>x</b>  | <b>y</b>  | <b>z</b>  |
|-------------|-----------|-----------|-----------|
| 16          | 0.882574  | -0.411953 | 0.064622  |
| 8           | 2.291329  | 0.047088  | -0.093987 |
| 8           | 0.831155  | -1.890603 | 0.147378  |
| 8           | 0.306283  | 0.188330  | 1.305257  |
| 8           | 0.088130  | 0.059159  | -1.114389 |
| 8           | -1.126270 | 2.481364  | -0.788318 |
| 1           | -0.706529 | 2.776381  | 0.039209  |
| 1           | -0.705523 | 1.602219  | -0.940575 |
| 8           | 2.252612  | 2.636762  | -0.933490 |
| 1           | 1.397220  | 2.633814  | -1.378444 |
| 1           | 2.357895  | 1.688788  | -0.667860 |
| 8           | -2.371899 | -0.996022 | -1.880279 |
| 1           | -1.452803 | -0.697109 | -1.712400 |
| 1           | -2.894915 | -0.351971 | -1.366751 |
| 8           | -3.482223 | 0.977102  | -0.088122 |
| 1           | -3.122948 | 0.440849  | 0.651685  |
| 1           | -2.758860 | 1.597504  | -0.301016 |
| 8           | -2.274815 | -0.660252 | 1.857189  |
| 1           | -1.359933 | -0.317868 | 1.747605  |
| 1           | -2.229790 | -1.512861 | 1.383880  |
| 8           | 3.647230  | -2.476598 | -0.077077 |
| 1           | 3.549070  | -1.510228 | -0.121501 |
| 1           | 2.705951  | -2.695908 | 0.017892  |
| 8           | -1.775653 | -2.911970 | 0.144187  |
| 1           | -2.097814 | -2.390234 | -0.616130 |
| 1           | -0.827828 | -2.660655 | 0.181887  |
| 8           | 0.633991  | 2.924782  | 1.481792  |
| 1           | 0.536959  | 1.948696  | 1.559389  |
| 1           | 1.329705  | 3.006681  | 0.808049  |

---



## 8.8.8-3

---

| <b>atom</b> | <b>x</b>  | <b>y</b>  | <b>z</b>  |
|-------------|-----------|-----------|-----------|
| 16          | -0.424001 | -0.401445 | -0.758722 |
| 8           | 0.832105  | -0.775702 | -1.466927 |
| 8           | -1.560674 | -1.169830 | -1.294764 |
| 8           | -0.256146 | -0.711854 | 0.711106  |
| 8           | -0.664906 | 1.064045  | -0.904272 |
| 8           | 1.539878  | 2.694639  | -0.414527 |
| 1           | 0.713067  | 2.212308  | -0.633441 |
| 1           | 2.227778  | 2.122317  | -0.803913 |
| 8           | 3.701522  | -0.521202 | 1.251993  |
| 1           | 3.005271  | 0.083825  | 1.590337  |
| 1           | 3.189227  | -1.314283 | 1.000862  |
| 8           | 1.518576  | 1.086278  | 1.947098  |
| 1           | 0.841816  | 0.469891  | 1.593827  |
| 1           | 1.554793  | 1.777279  | 1.257531  |
| 8           | 1.880472  | -2.558967 | 0.400065  |
| 1           | 1.715523  | -2.137604 | -0.466694 |
| 1           | 1.122656  | -2.170662 | 0.872395  |
| 8           | -2.717563 | -0.609628 | 2.041035  |
| 1           | -3.299176 | -0.815991 | 1.290780  |
| 1           | -1.820665 | -0.701729 | 1.651802  |
| 8           | -4.119091 | -0.520288 | -0.553824 |
| 1           | -3.245437 | -0.813307 | -0.901928 |
| 1           | -3.945858 | 0.414424  | -0.350013 |
| 8           | 3.230894  | 0.597912  | -1.380521 |
| 1           | 3.542936  | 0.251989  | -0.523931 |
| 1           | 2.372123  | 0.136171  | -1.501319 |
| 8           | -2.916328 | 1.911889  | 0.516087  |
| 1           | -2.113633 | 1.717323  | -0.016180 |
| 1           | -2.826314 | 1.292842  | 1.259032  |

---

## 8.8.8-4

---

| <b>atom</b> | <b>x</b>  | <b>y</b>  | <b>z</b>  |
|-------------|-----------|-----------|-----------|
| 16          | 0.420333  | -0.487377 | -0.709763 |
| 8           | -0.833475 | -0.948485 | -1.375356 |
| 8           | 0.239180  | -0.607620 | 0.783618  |
| 8           | 1.556196  | -1.322764 | -1.136406 |
| 8           | 0.665847  | 0.945388  | -1.045277 |
| 8           | -3.902994 | -0.434860 | 0.847216  |
| 1           | -3.328913 | -1.225298 | 0.823672  |
| 1           | -3.703238 | 0.011715  | -0.003725 |
| 8           | 4.124120  | -0.638870 | -0.474572 |
| 1           | 3.967944  | 0.317841  | -0.399950 |
| 1           | 3.245399  | -0.958141 | -0.784882 |
| 8           | -1.940708 | -2.496780 | 0.605848  |
| 1           | -1.679299 | -2.136037 | -0.269615 |
| 1           | -1.228350 | -2.095264 | 1.128377  |
| 8           | -1.351711 | 2.708111  | -0.252600 |
| 1           | -1.505532 | 2.304390  | 0.623237  |
| 1           | -0.591735 | 2.184162  | -0.586144 |
| 8           | 2.951330  | 1.930036  | 0.240870  |
| 1           | 2.846949  | 1.418535  | 1.060068  |
| 1           | 2.145785  | 1.681972  | -0.263542 |
| 8           | -1.680973 | 1.019384  | 2.023377  |
| 1           | -2.494645 | 0.566607  | 1.735871  |
| 1           | -0.963153 | 0.476632  | 1.631801  |
| 8           | 2.699767  | -0.349349 | 2.096510  |
| 1           | 1.802015  | -0.483585 | 1.721617  |
| 1           | 3.280024  | -0.668400 | 1.385803  |
| 8           | -2.992133 | 0.779669  | -1.525651 |
| 1           | -2.235566 | 0.155302  | -1.586128 |
| 1           | -2.558585 | 1.576722  | -1.160886 |

---

## 8.8.8-5

---

| <b>atom</b> | <b>x</b>  | <b>y</b>  | <b>z</b>  |
|-------------|-----------|-----------|-----------|
| 16          | 0.423829  | -0.375981 | -0.755999 |
| 8           | -0.834636 | -0.742148 | -1.465273 |
| 8           | 1.561925  | -1.119218 | -1.323387 |
| 8           | 0.652877  | 1.094382  | -0.867591 |
| 8           | 0.267381  | -0.723293 | 0.706171  |
| 8           | 4.036865  | -1.021316 | -0.153632 |
| 1           | 3.716863  | -0.908523 | 0.757449  |
| 1           | 3.190382  | -1.129722 | -0.645697 |
| 8           | -3.234615 | 0.624717  | -1.372160 |
| 1           | -3.554691 | 0.252775  | -0.529687 |
| 1           | -2.373367 | 0.168363  | -1.496475 |
| 8           | -1.557390 | 1.027218  | 1.966099  |
| 1           | -0.871102 | 0.425239  | 1.608006  |
| 1           | -1.588073 | 1.735546  | 1.293803  |
| 8           | -1.870406 | -2.575158 | 0.348188  |
| 1           | -1.118983 | -2.201418 | 0.840888  |
| 1           | -1.697956 | -2.123938 | -0.502755 |
| 8           | -3.723984 | -0.575680 | 1.224045  |
| 1           | -3.202566 | -1.358403 | 0.959733  |
| 1           | -3.034566 | 0.027273  | 1.579864  |
| 8           | -1.554784 | 2.702202  | -0.343835 |
| 1           | -0.724567 | 2.228459  | -0.570179 |
| 1           | -2.238289 | 2.138733  | -0.753364 |
| 8           | 3.218262  | 1.811600  | -0.033846 |
| 1           | 3.673794  | 0.984380  | -0.261679 |
| 1           | 2.307212  | 1.655511  | -0.367518 |
| 8           | 2.568537  | -0.042779 | 2.161135  |
| 1           | 1.732730  | -0.339660 | 1.739918  |
| 1           | 2.761654  | 0.776862  | 1.676362  |

---

## 8.8.8-6

---

| <b>atom</b> | <b>x</b>  | <b>y</b>  | <b>z</b>  |
|-------------|-----------|-----------|-----------|
| 16          | 0.418961  | -0.486374 | -0.705747 |
| 8           | 0.246762  | -0.612236 | 0.787451  |
| 8           | 0.657917  | 0.948126  | -1.038920 |
| 8           | 1.554627  | -1.313761 | -1.147978 |
| 8           | -0.838301 | -0.948238 | -1.365531 |
| 8           | -2.976294 | 0.803978  | -1.521413 |
| 1           | -2.541161 | 1.594724  | -1.145620 |
| 1           | -2.223877 | 0.174512  | -1.581931 |
| 8           | -1.951118 | -2.501538 | 0.597172  |
| 1           | -1.245954 | -2.111917 | 1.136975  |
| 1           | -1.675358 | -2.128655 | -0.269818 |
| 8           | 4.015751  | -1.083657 | 0.029160  |
| 1           | 3.172118  | -1.254094 | -0.450126 |
| 1           | 3.689372  | -0.816936 | 0.905214  |
| 8           | 3.243001  | 1.742231  | -0.332139 |
| 1           | 3.684200  | 0.880869  | -0.416006 |
| 1           | 2.330193  | 1.549480  | -0.640172 |
| 8           | -3.920832 | -0.443261 | 0.819995  |
| 1           | -3.345735 | -1.232908 | 0.797650  |
| 1           | -3.708368 | 0.013716  | -0.022360 |
| 8           | 2.541641  | 0.288845  | 2.132952  |
| 1           | 2.751415  | 1.011565  | 1.518360  |
| 1           | 1.705506  | -0.065633 | 1.759880  |
| 8           | -1.705116 | 0.989446  | 2.029864  |
| 1           | -2.516818 | 0.542972  | 1.727467  |
| 1           | -0.983828 | 0.452698  | 1.637581  |
| 8           | -1.332805 | 2.715721  | -0.211919 |
| 1           | -0.576216 | 2.188525  | -0.549161 |
| 1           | -1.500739 | 2.297824  | 0.654481  |

---

## 8.8.8-7

---

| <b>atom</b> | <b>x</b>  | <b>y</b>  | <b>z</b>  |
|-------------|-----------|-----------|-----------|
| 16          | 0.000000  | 0.642650  | 0.000008  |
| 8           | 0.001402  | -0.224599 | -1.218583 |
| 8           | 1.217880  | 1.493991  | 0.000037  |
| 8           | -1.217879 | 1.493993  | 0.000002  |
| 8           | -0.001403 | -0.224632 | 1.218576  |
| 8           | -2.284646 | -1.833909 | 1.291850  |
| 1           | -2.410409 | -1.903363 | 0.326082  |
| 1           | -1.432645 | -1.348998 | 1.354008  |
| 8           | 2.400536  | -1.575758 | 1.570428  |
| 1           | 1.498675  | -1.188394 | 1.507944  |
| 1           | 2.961173  | -0.780077 | 1.584730  |
| 8           | 2.284646  | -1.833873 | -1.291899 |
| 1           | 2.410407  | -1.903354 | -0.326132 |
| 1           | 1.432644  | -1.348961 | -1.354044 |
| 8           | -2.400538 | -1.575714 | -1.570470 |
| 1           | -2.961174 | -0.780033 | -1.584750 |
| 1           | -1.498677 | -1.188353 | -1.507975 |
| 8           | -3.451398 | 0.732554  | 1.584921  |
| 1           | -3.204689 | -0.213775 | 1.607117  |
| 1           | -2.625679 | 1.131543  | 1.245846  |
| 8           | 3.634556  | 1.031101  | 1.273787  |
| 1           | 2.702073  | 1.281399  | 1.103280  |
| 1           | 3.931004  | 0.892801  | 0.357194  |
| 8           | 3.451401  | 0.732595  | -1.584902 |
| 1           | 2.625685  | 1.131581  | -1.245814 |
| 1           | 3.204688  | -0.213732 | -1.607122 |
| 8           | -3.634556 | 1.031136  | -1.273758 |
| 1           | -2.702073 | 1.281431  | -1.103246 |
| 1           | -3.931002 | 0.892812  | -0.357168 |

---

---

| <b>atom</b> | <b>x</b>  | <b>y</b>  | <b>z</b>  |
|-------------|-----------|-----------|-----------|
| 16          | -0.426223 | -1.018329 | -0.432270 |
| 8           | -0.054935 | 0.021995  | -1.435996 |
| 8           | -0.284313 | -0.418089 | 0.949693  |
| 8           | -1.849173 | -1.412066 | -0.629843 |
| 8           | 0.456126  | -2.190382 | -0.550905 |
| 8           | 2.363205  | -0.511142 | 1.917258  |
| 1           | 2.783202  | -0.974148 | 1.166352  |
| 1           | 1.413341  | -0.547011 | 1.677818  |
| 8           | -1.638451 | 2.298225  | -1.426953 |
| 1           | -1.044621 | 1.524275  | -1.549018 |
| 1           | -2.447622 | 1.879669  | -1.084084 |
| 8           | -2.799195 | -0.961533 | 2.066273  |
| 1           | -2.836878 | -1.473624 | 1.243887  |
| 1           | -1.880795 | -0.639029 | 1.977520  |
| 8           | 2.576165  | 2.173496  | 1.025712  |
| 1           | 2.597713  | 1.276914  | 1.419849  |
| 1           | 1.620479  | 2.386698  | 1.020571  |
| 8           | -3.707395 | 0.553359  | -0.398784 |
| 1           | -3.061307 | -0.148756 | -0.656302 |
| 1           | -3.636045 | 0.504957  | 0.564475  |
| 8           | 2.582724  | 0.920324  | -1.568349 |
| 1           | 2.643223  | 1.439213  | -0.743853 |
| 1           | 1.647633  | 0.622426  | -1.582225 |
| 8           | 3.176223  | -1.676244 | -0.562737 |
| 1           | 2.237776  | -1.965197 | -0.606842 |
| 1           | 3.139665  | -0.796371 | -0.987386 |
| 8           | -0.244167 | 2.359636  | 1.080393  |
| 1           | -0.695597 | 2.564379  | 0.241211  |
| 1           | -0.275118 | 1.378227  | 1.088256  |

---

8.8.8-8

## 8.9.7-1

---

| <b>atom</b> | <b>x</b>  | <b>y</b>  | <b>z</b>  |
|-------------|-----------|-----------|-----------|
| 8           | 0.307826  | -0.345701 | 1.221621  |
| 16          | 0.200380  | 0.508947  | 0.002231  |
| 8           | 1.286180  | 1.520710  | -0.001458 |
| 8           | -1.125309 | 1.199224  | 0.000243  |
| 8           | 0.306633  | -0.351779 | -1.211907 |
| 1           | -0.914856 | -1.702970 | -1.336117 |
| 8           | -1.681887 | -2.312841 | -1.276040 |
| 1           | -1.800724 | -2.399778 | -0.310723 |
| 1           | -3.712056 | 0.140643  | 0.338250  |
| 8           | -3.461868 | 0.320302  | 1.262269  |
| 1           | -2.583043 | 0.724522  | 1.116159  |
| 1           | 1.966377  | -0.998632 | -1.578132 |
| 8           | 2.898098  | -1.307186 | -1.618722 |
| 1           | 3.381758  | -0.579387 | -1.194393 |
| 1           | -2.532510 | -1.361766 | 1.586660  |
| 8           | -1.855554 | -2.061642 | 1.578771  |
| 1           | -1.025433 | -1.539863 | 1.516589  |
| 1           | 2.734267  | -1.982569 | 0.303545  |
| 8           | 2.663287  | -1.849617 | 1.263450  |
| 1           | 1.812277  | -1.366036 | 1.345205  |
| 1           | -2.467108 | 0.575659  | -1.264899 |
| 8           | -3.220673 | 0.041331  | -1.580448 |
| 1           | -2.826045 | -0.854093 | -1.595068 |
| 1           | 0.577878  | 3.368448  | -0.007266 |
| 8           | -0.194720 | 3.959847  | -0.010431 |
| 1           | -0.882184 | 3.276444  | -0.010466 |
| 8           | 3.879029  | 0.642353  | 0.362145  |
| 1           | 2.996024  | 1.059050  | 0.246437  |
| 1           | 3.660966  | -0.142815 | 0.892590  |

---

## 8.9.7-2

---

| <b>atom</b> | <b>x</b>  | <b>y</b>  | <b>z</b>  |
|-------------|-----------|-----------|-----------|
| 16          | 0.081642  | -0.379238 | -0.695826 |
| 8           | 0.401260  | -1.816406 | -0.891329 |
| 8           | -1.184021 | -0.038292 | -1.407435 |
| 8           | -0.104332 | -0.120995 | 0.773825  |
| 8           | 1.182660  | 0.472093  | -1.214939 |
| 8           | 0.708922  | 3.153504  | -0.470685 |
| 1           | -0.264470 | 3.097336  | -0.450829 |
| 1           | 0.955390  | 2.276420  | -0.829736 |
| 8           | -3.328203 | -1.387296 | -0.235829 |
| 1           | -2.778955 | -2.037068 | 0.238227  |
| 1           | -2.655381 | -0.921023 | -0.778424 |
| 8           | 3.102759  | -2.455758 | 0.025905  |
| 1           | 3.384306  | -1.546102 | 0.218757  |
| 1           | 2.189546  | -2.330509 | -0.289377 |
| 8           | 3.558286  | 0.443256  | 0.228445  |
| 1           | 3.114292  | 0.890592  | 0.970401  |
| 1           | 2.825358  | 0.410198  | -0.420633 |
| 8           | -2.613599 | 0.754710  | 1.594752  |
| 1           | -3.084005 | 0.082842  | 1.069615  |
| 1           | -1.678824 | 0.524422  | 1.403954  |
| 8           | -2.102044 | 2.488732  | -0.655547 |
| 1           | -1.780436 | 1.669715  | -1.089634 |
| 1           | -2.397274 | 2.131143  | 0.200816  |
| 8           | -1.214508 | -2.866028 | 1.095814  |
| 1           | -0.992842 | -2.050527 | 1.566843  |
| 1           | -0.635366 | -2.746443 | 0.311266  |
| 8           | 1.604534  | 1.766945  | 1.921149  |
| 1           | 1.027388  | 1.024457  | 1.645602  |
| 1           | 1.371306  | 2.436642  | 1.253367  |

---



## 8.9.7-3

---

| <b>atom</b> | <b>x</b>  | <b>y</b>  | <b>z</b>  |
|-------------|-----------|-----------|-----------|
| 16          | 0.201442  | 0.502728  | -0.005758 |
| 8           | 0.310356  | -0.355514 | -1.221325 |
| 8           | -1.123287 | 1.194888  | -0.008807 |
| 8           | 0.304151  | -0.354831 | 1.212090  |
| 8           | 1.288183  | 1.513496  | -0.000156 |
| 8           | 2.684714  | -1.834339 | -1.265586 |
| 1           | 2.747029  | -1.977189 | -0.306547 |
| 1           | 1.830490  | -1.357041 | -1.350169 |
| 8           | -0.189225 | 3.954473  | 0.011178  |
| 1           | 0.582321  | 3.361674  | 0.008806  |
| 1           | -0.877877 | 3.272339  | 0.003154  |
| 8           | -3.246759 | 0.074248  | -1.567580 |
| 1           | -2.486299 | 0.600174  | -1.253970 |
| 1           | -2.857766 | -0.823527 | -1.593221 |
| 8           | -1.718301 | -2.285567 | -1.298346 |
| 1           | -1.823017 | -2.386718 | -0.332695 |
| 1           | -0.945076 | -1.684318 | -1.359974 |
| 8           | 2.890531  | -1.319302 | 1.624413  |
| 1           | 3.377763  | -0.588308 | 1.209617  |
| 1           | 1.959367  | -1.009461 | 1.579757  |
| 8           | -3.444060 | 0.310641  | 1.284254  |
| 1           | -2.565640 | 0.712802  | 1.130798  |
| 1           | -3.709096 | 0.145986  | 0.361636  |
| 8           | -1.844664 | -2.081815 | 1.561202  |
| 1           | -1.014389 | -1.559716 | 1.498105  |
| 1           | -2.520001 | -1.380712 | 1.585037  |
| 8           | 3.888215  | 0.646668  | -0.330697 |
| 1           | 3.677526  | -0.134315 | -0.870382 |
| 1           | 3.002761  | 1.060325  | -0.222957 |

---

## 8.9.7-4

---

| <b>atom</b> | <b>x</b>  | <b>y</b>  | <b>z</b>  |
|-------------|-----------|-----------|-----------|
| 16          | 0.000548  | 0.245843  | -0.526765 |
| 8           | -0.044667 | -1.135804 | -1.078977 |
| 8           | 0.012482  | 0.170386  | 0.974953  |
| 8           | 1.230465  | 0.939361  | -0.990078 |
| 8           | -1.194891 | 1.011952  | -0.964114 |
| 8           | 3.666768  | -0.051953 | -0.135052 |
| 1           | 2.858231  | 0.387432  | -0.480106 |
| 1           | 3.360195  | -0.385531 | 0.725026  |
| 8           | -3.674385 | -0.188415 | -0.703416 |
| 1           | -2.843024 | 0.311782  | -0.858266 |
| 1           | -3.372090 | -1.110214 | -0.768048 |
| 8           | 0.095987  | 3.535586  | -1.018726 |
| 1           | -0.659300 | 2.921689  | -1.058067 |
| 1           | 0.808346  | 2.873708  | -1.078675 |
| 8           | -2.220549 | -2.682863 | -0.267578 |
| 1           | -1.425314 | -2.229410 | -0.621281 |
| 1           | -2.281982 | -2.309443 | 0.628312  |
| 8           | -2.465811 | -0.784529 | 1.926073  |
| 1           | -1.578605 | -0.431656 | 1.702912  |
| 1           | -3.029892 | -0.396327 | 1.237445  |
| 8           | 0.138692  | 2.975805  | 1.909343  |
| 1           | 0.101902  | 2.018298  | 1.739969  |
| 1           | 0.132621  | 3.341223  | 1.010864  |
| 8           | 2.351847  | -2.556788 | -0.864835 |
| 1           | 2.955398  | -1.795064 | -0.835289 |
| 1           | 1.481496  | -2.131980 | -1.021233 |
| 8           | 2.106586  | -1.483090 | 1.876497  |
| 1           | 2.115544  | -2.097085 | 1.124057  |
| 1           | 1.347521  | -0.898106 | 1.667901  |

---

## 8.9.7-5

---

| <b>atom</b> | <b>x</b>  | <b>y</b>  | <b>z</b>  |
|-------------|-----------|-----------|-----------|
| 16          | 0.101089  | 0.571234  | 0.000000  |
| 8           | 1.552038  | 0.237865  | 0.000000  |
| 8           | -0.689717 | -0.707391 | 0.000000  |
| 8           | -0.241847 | 1.358295  | 1.212709  |
| 8           | -0.241847 | 1.358295  | -1.212709 |
| 8           | 0.064082  | 0.166157  | 3.686753  |
| 1           | -0.085237 | 0.678935  | 2.861678  |
| 1           | -0.163142 | -0.735117 | 3.401641  |
| 8           | 0.064082  | 0.166157  | -3.686753 |
| 1           | -0.163142 | -0.735117 | -3.401641 |
| 1           | -0.085237 | 0.678935  | -2.861678 |
| 8           | -2.354183 | 2.815191  | 0.000000  |
| 1           | -1.796408 | 2.501614  | -0.734407 |
| 1           | -1.796408 | 2.501614  | 0.734407  |
| 8           | 2.536050  | -0.742931 | -2.417176 |
| 1           | 1.897740  | -0.304755 | -3.005287 |
| 1           | 2.295842  | -0.381328 | -1.536923 |
| 8           | 0.064082  | -2.333343 | -2.187744 |
| 1           | -0.275606 | -1.849904 | -1.405670 |
| 1           | 1.002386  | -2.082307 | -2.201066 |
| 8           | -3.527746 | 0.070743  | 0.000000  |
| 1           | -2.634860 | -0.317316 | 0.000000  |
| 1           | -3.334739 | 1.021189  | 0.000000  |
| 8           | 2.536050  | -0.742931 | 2.417176  |
| 1           | 1.897740  | -0.304755 | 3.005287  |
| 1           | 2.295842  | -0.381328 | 1.536923  |
| 8           | 0.064082  | -2.333343 | 2.187744  |
| 1           | 1.002386  | -2.082307 | 2.201066  |
| 1           | -0.275606 | -1.849904 | 1.405670  |

---

## 8.9.7-6

---

| <b>atom</b> | <b>x</b>  | <b>y</b>  | <b>z</b>  |
|-------------|-----------|-----------|-----------|
| 16          | 0.111556  | -0.232792 | -0.604659 |
| 8           | -0.969186 | -1.218867 | -0.846943 |
| 8           | 0.354214  | -0.100851 | 0.869845  |
| 8           | 1.363362  | -0.656703 | -1.275938 |
| 8           | -0.306875 | 1.107835  | -1.130800 |
| 8           | 1.263625  | 2.827993  | 0.292046  |
| 1           | 0.661115  | 2.340808  | -0.319967 |
| 1           | 1.212582  | 2.260552  | 1.070493  |
| 8           | 3.092994  | -2.632851 | -0.104374 |
| 1           | 2.427227  | -2.142137 | -0.619499 |
| 1           | 3.226682  | -2.025760 | 0.641276  |
| 8           | 3.024081  | -0.306198 | 1.708790  |
| 1           | 2.062585  | -0.316717 | 1.518047  |
| 1           | 3.366275  | 0.221019  | 0.964884  |
| 8           | 3.412919  | 1.197495  | -0.747209 |
| 1           | 2.816009  | 1.907198  | -0.450517 |
| 1           | 2.779688  | 0.520484  | -1.067592 |
| 8           | -1.971337 | 0.726375  | 2.175575  |
| 1           | -2.363346 | 1.216917  | 1.428052  |
| 1           | -1.096531 | 0.460032  | 1.817256  |
| 8           | -3.684238 | -0.771322 | -1.227244 |
| 1           | -2.721456 | -0.853688 | -1.388862 |
| 1           | -3.729667 | -1.164962 | -0.337739 |
| 8           | -2.860702 | 1.847075  | -0.325515 |
| 1           | -3.320970 | 1.052526  | -0.649899 |
| 1           | -1.941604 | 1.690805  | -0.637369 |
| 8           | -2.782017 | -1.843774 | 1.275179  |
| 1           | -2.626053 | -1.003142 | 1.749284  |
| 1           | -2.032151 | -1.848909 | 0.649402  |

---

## 8.9.7-7

---

| <b>atom</b> | <b>x</b>  | <b>y</b>  | <b>z</b>  |
|-------------|-----------|-----------|-----------|
| 16          | -0.113407 | -0.200652 | -0.602102 |
| 8           | -0.363838 | -0.070449 | 0.873538  |
| 8           | 0.961532  | -1.194136 | -0.839685 |
| 8           | -1.364816 | -0.619131 | -1.277953 |
| 8           | 0.314600  | 1.137163  | -1.122153 |
| 8           | 1.999262  | 0.338065  | 2.286256  |
| 1           | 2.448365  | -0.473033 | 1.988029  |
| 1           | 1.110971  | 0.241423  | 1.876430  |
| 8           | 3.621642  | -0.360871 | -1.372370 |
| 1           | 3.509096  | 0.505512  | -0.932724 |
| 1           | 2.692139  | -0.655855 | -1.441859 |
| 8           | -3.030799 | -0.361127 | 1.703251  |
| 1           | -3.381268 | 0.176222  | 0.970499  |
| 1           | -2.069012 | -0.348888 | 1.514746  |
| 8           | -3.439859 | 1.189477  | -0.721123 |
| 1           | -2.850707 | 1.900348  | -0.411957 |
| 1           | -2.797167 | 0.526662  | -1.052813 |
| 8           | -1.295713 | 2.807159  | 0.344013  |
| 1           | -1.229637 | 2.186932  | 1.080989  |
| 1           | -0.685651 | 2.371129  | -0.295656 |
| 8           | 2.980172  | -2.003871 | 0.904735  |
| 1           | 2.104048  | -1.931060 | 0.474398  |
| 1           | 3.520091  | -1.523863 | 0.252442  |
| 8           | 2.738019  | 1.939520  | 0.020634  |
| 1           | 1.885974  | 1.767343  | -0.435835 |
| 1           | 2.593858  | 1.508170  | 0.885021  |
| 8           | -3.050455 | -2.656159 | -0.147843 |
| 1           | -2.395990 | -2.142421 | -0.655003 |
| 1           | -3.198596 | -2.063304 | 0.606513  |

---

## 8.9.7-8

---

| <b>atom</b> | <b>x</b>  | <b>y</b>  | <b>z</b>  |
|-------------|-----------|-----------|-----------|
| 16          | 0.123217  | 0.322975  | -0.591750 |
| 8           | 0.255508  | 0.590994  | 0.882954  |
| 8           | -1.146628 | 0.912871  | -1.081287 |
| 8           | 1.279031  | 0.936967  | -1.294498 |
| 8           | 0.111419  | -1.150876 | -0.819335 |
| 8           | -3.425590 | -0.743142 | -1.464793 |
| 1           | -2.607181 | -0.221847 | -1.582113 |
| 1           | -3.123385 | -1.423767 | -0.830456 |
| 8           | -2.092990 | -2.336546 | 0.458413  |
| 1           | -1.274944 | -2.047729 | 0.000716  |
| 1           | -2.150219 | -1.699630 | 1.196549  |
| 8           | 1.595632  | 3.249034  | 0.366195  |
| 1           | 1.110373  | 2.678879  | 0.977660  |
| 1           | 1.628705  | 2.650916  | -0.401857 |
| 8           | 2.742105  | -0.296445 | 1.835958  |
| 1           | 3.266889  | -0.061348 | 1.053536  |
| 1           | 1.848080  | 0.032572  | 1.599334  |
| 8           | 3.755572  | -0.276902 | -0.955429 |
| 1           | 3.433862  | -1.181445 | -0.801004 |
| 1           | 2.923799  | 0.205997  | -1.154597 |
| 8           | -3.458425 | 1.483445  | 0.358188  |
| 1           | -2.558918 | 1.561150  | -0.020709 |
| 1           | -3.790243 | 0.735715  | -0.169419 |
| 8           | 2.316053  | -2.581920 | 0.086300  |
| 1           | 1.504215  | -2.174815 | -0.287933 |
| 1           | 2.455613  | -2.043929 | 0.884229  |
| 8           | -2.034935 | -0.127856 | 2.292178  |
| 1           | -2.645922 | 0.439872  | 1.789366  |
| 1           | -1.166218 | 0.104816  | 1.895947  |

---

---

| <b>atom</b> | <b>x</b>  | <b>y</b>  | <b>z</b>  |
|-------------|-----------|-----------|-----------|
| 16          | 0.169726  | 0.246427  | -0.266438 |
| 8           | -0.121228 | -0.609911 | 0.927126  |
| 8           | 0.527123  | -0.627709 | -1.416288 |
| 8           | -1.043525 | 1.049502  | -0.595912 |
| 8           | 1.309096  | 1.163811  | 0.040490  |
| 8           | -3.087164 | -0.750578 | -1.474034 |
| 1           | -2.441690 | -0.047379 | -1.260164 |
| 1           | -2.558933 | -1.556899 | -1.337712 |
| 8           | 3.285659  | -0.136014 | -1.558398 |
| 1           | 2.442837  | -0.595620 | -1.730107 |
| 1           | 2.927409  | 0.581858  | -1.009060 |
| 8           | 2.321759  | -0.203593 | 2.307655  |
| 1           | 1.495343  | -0.670807 | 2.093377  |
| 1           | 2.229417  | 0.520944  | 1.663573  |
| 8           | -2.312304 | 0.766318  | 2.008563  |
| 1           | -2.183607 | 1.273706  | 1.192724  |
| 1           | -1.572845 | 0.137168  | 1.897314  |
| 8           | -1.098951 | -2.775113 | -0.837639 |
| 1           | -1.037928 | -2.440361 | 0.068856  |
| 1           | -0.458844 | -2.164364 | -1.262536 |
| 8           | 0.152739  | 3.672899  | -0.792291 |
| 1           | 0.836648  | 3.073355  | -0.452228 |
| 1           | -0.556235 | 3.018856  | -0.897663 |
| 8           | -4.675236 | -0.510149 | 0.915850  |
| 1           | -4.249780 | -0.650999 | 0.049297  |
| 1           | -3.950352 | -0.114041 | 1.431198  |
| 8           | 4.535021  | -1.318938 | 0.786816  |
| 1           | 3.825533  | -1.048683 | 1.396779  |
| 1           | 4.193503  | -1.023750 | -0.076145 |

---

8.11.5-1

## 8.12.4-1

---

| <b>atom</b> | <b>x</b>  | <b>y</b>  | <b>z</b>  |
|-------------|-----------|-----------|-----------|
| 16          | -0.000001 | 0.293586  | -0.000009 |
| 8           | 0.000012  | -0.560943 | -1.219198 |
| 8           | -0.000016 | -0.560973 | 1.219160  |
| 8           | 1.217000  | 1.166477  | 0.000016  |
| 8           | -1.216998 | 1.166481  | -0.000012 |
| 8           | 2.735354  | -0.044617 | 2.012764  |
| 1           | 2.416153  | 0.610350  | 1.362626  |
| 1           | 1.931407  | -0.584600 | 2.060776  |
| 1           | -1.931411 | -0.584553 | 2.060762  |
| 8           | -2.735364 | -0.044577 | 2.012756  |
| 1           | -2.416175 | 0.610387  | 1.362612  |
| 1           | -1.931454 | -0.584590 | -2.060779 |
| 8           | -2.735395 | -0.044603 | -2.012728 |
| 1           | -2.416168 | 0.610351  | -1.362590 |
| 1           | 2.416182  | 0.610379  | -1.362573 |
| 8           | 2.735405  | -0.044567 | -2.012721 |
| 1           | 1.931463  | -0.584552 | -2.060774 |
| 1           | 0.000016  | -2.549230 | -0.730824 |
| 8           | 0.000000  | -3.186588 | -0.000069 |
| 1           | -0.000017 | -2.549274 | 0.730724  |
| 1           | -0.731309 | 3.147050  | -0.000029 |
| 8           | 0.000003  | 3.784901  | -0.000024 |
| 1           | 0.731315  | 3.147051  | -0.000008 |
| 1           | 4.057781  | -0.785952 | 0.759902  |
| 8           | 4.629112  | -0.993769 | 0.000035  |
| 1           | 4.057801  | -0.785933 | -0.759843 |
| 1           | -4.057796 | -0.785948 | -0.759843 |
| 8           | -4.629111 | -0.993770 | 0.000035  |
| 1           | -4.057784 | -0.785938 | 0.759902  |

---



## 8.12.4-2

---

| <b>atom</b> | <b>x</b>  | <b>y</b>  | <b>z</b>  |
|-------------|-----------|-----------|-----------|
| 16          | -0.654658 | 0.000005  | -0.126717 |
| 8           | -1.458730 | -1.222115 | -0.396169 |
| 8           | -0.182767 | 0.000019  | 1.285455  |
| 8           | 0.542833  | -0.000008 | -1.045340 |
| 8           | -1.458723 | 1.222123  | -0.396196 |
| 8           | 2.584477  | -0.000028 | 0.809333  |
| 1           | 2.105739  | -0.000025 | -0.044634 |
| 1           | 1.799731  | -0.000013 | 1.386289  |
| 8           | -1.730307 | 2.317356  | 2.228125  |
| 1           | -1.104038 | 1.593018  | 2.371321  |
| 1           | -1.888740 | 2.173812  | 1.279799  |
| 8           | -3.684251 | 0.000002  | -1.783068 |
| 1           | -3.142259 | -0.731947 | -1.447462 |
| 1           | -3.142248 | 0.731948  | -1.447474 |
| 8           | 0.784247  | -2.737441 | -1.528670 |
| 1           | 0.869408  | -1.765304 | -1.591593 |
| 1           | -0.051910 | -2.773458 | -1.042094 |
| 8           | -1.730372 | -2.317249 | 2.228189  |
| 1           | -1.888784 | -2.173738 | 1.279854  |
| 1           | -1.104093 | -1.592918 | 2.371370  |
| 8           | 0.784315  | 2.737411  | -1.528684 |
| 1           | -0.051842 | 2.773477  | -1.042114 |
| 1           | 0.869436  | 1.765268  | -1.591586 |
| 8           | 3.169148  | -2.834103 | 0.146402  |
| 1           | 3.085632  | -1.931614 | 0.494953  |
| 1           | 2.359988  | -2.938043 | -0.385071 |
| 8           | 3.169222  | 2.834026  | 0.146382  |
| 1           | 2.360064  | 2.937981  | -0.385091 |
| 1           | 3.085684  | 1.931541  | 0.494939  |

---
